# Supplementary material for: Comparing the Fate and Transport of MS2 Bacteriophage and Sodium Fluorescein in a Karstic Chalk Aquifer
Source: MDPI journal article supplement (doi:10.3390/pathogens13020168), 2024-02-13
Supplement: s1 [file s1]

# PEST RUN RECORD: CASE mfit

PEST Version: 16.1

PEST run mode:-

Parameter estimation mode

Case dimensions:-

|                                 |   |     |
|---------------------------------|---|-----|
| Number of parameters            | : | 12  |
| Number of adjustable parameters | : | 12  |
| Number of parameter groups      | : | 1   |
| Number of observations          | : | 500 |
| Number of prior estimates       | : | 0   |

Model command line(s):-

MDP\_2RNE

Jacobian command line:-

MDP\_2RNE /d  
Jacobian read from file Deriv.txt  
This is an ASCII file.

Model interface files:-

Templates:  
MFIT.tpl  
for model input files:  
Input.txt  
  
(Parameter values written using single precision protocol.)  
(Decimal point always included.)  
  
Instruction files:  
MFIT.ins  
for reading model output files:  
Output.txt

PEST-to-model message file:-

na

Singular value decomposition:-

|                                          |   |              |
|------------------------------------------|---|--------------|
| Perform SVD on $XtQX$ or $Q^{(1/2)}X$    | : | $Q^{(1/2)}X$ |
| Max. number of singular values to employ | : | 12           |
| Ratio of lowest/highest singular value   | : | 5.000000E-07 |
| Record eigenvectors in SVD file          | : | yes          |

Derivatives calculation:-

| Param group | Increment type | Increment  | Increment low bound | Forward or central switch | Multiplier (central) | Method (central) |
|-------------|----------------|------------|---------------------|---------------------------|----------------------|------------------|
| pgnam       | relative       | 1.0000E-02 | none                | switch                    | 1.500                | parabolic        |

Parameter definitions:-

| Name | Trans-formation | Change limit | Initial value | Lower bound | Upper bound |
|------|-----------------|--------------|---------------|-------------|-------------|
|------|-----------------|--------------|---------------|-------------|-------------|

|    |    |     |        |              |              |              |
|----|----|-----|--------|--------------|--------------|--------------|
| 74 | h1 | log | factor | 80.0000      | 80.0000      | 110.000      |
| 75 | s1 | log | factor | 2500.00      | 1.00000      | 5000.00      |
| 76 | p1 | log | factor | 0.850000     | 0.100000     | 0.999000     |
| 77 | o1 | log | factor | 3.300000E-04 | 1.000000E-10 | 1.000000E-02 |
| 78 | h2 | log | factor | 130.000      | 120.000      | 140.000      |
| 79 | s2 | log | factor | 750.000      | 1.00000      | 5000.00      |
| 80 | p2 | log | factor | 0.780000     | 0.100000     | 0.999000     |
| 81 | o2 | log | factor | 1.600000E-05 | 1.000000E-10 | 1.000000E-02 |
| 82 | h3 | log | factor | 170.000      | 160.000      | 180.000      |
| 83 | s3 | log | factor | 800.000      | 1.00000      | 5000.00      |
| 84 | p3 | log | factor | 0.300000     | 0.100000     | 0.999000     |
| 85 | o3 | log | factor | 3.500000E-05 | 1.000000E-10 | 1.000000E-02 |

|    |      |       |         |         |       |                |
|----|------|-------|---------|---------|-------|----------------|
| 86 |      |       |         |         |       |                |
| 87 | Name | Group | Scale   | Offset  | Model | command number |
| 88 | h1   | pgnam | 1.00000 | 0.00000 | 1     |                |
| 89 | s1   | pgnam | 1.00000 | 0.00000 | 0     |                |
| 90 | p1   | pgnam | 1.00000 | 0.00000 | 1     |                |
| 91 | o1   | pgnam | 1.00000 | 0.00000 | 0     |                |
| 92 | h2   | pgnam | 1.00000 | 0.00000 | 1     |                |
| 93 | s2   | pgnam | 1.00000 | 0.00000 | 0     |                |
| 94 | p2   | pgnam | 1.00000 | 0.00000 | 1     |                |
| 95 | o2   | pgnam | 1.00000 | 0.00000 | 0     |                |
| 96 | h3   | pgnam | 1.00000 | 0.00000 | 1     |                |
| 97 | s3   | pgnam | 1.00000 | 0.00000 | 0     |                |
| 98 | p3   | pgnam | 1.00000 | 0.00000 | 1     |                |
| 99 | o3   | pgnam | 1.00000 | 0.00000 | 0     |                |

100

101

102 Prior information:-

103

104 No prior information supplied

105

106

107 Observations:-

108

|     |                  |              |        |       |
|-----|------------------|--------------|--------|-------|
| 109 | Observation name | Observation  | Weight | Group |
| 110 | o1               | 1.762070E-39 | 1.000  | conc  |
| 111 | o2               | 2.325900E-39 | 1.000  | conc  |
| 112 | o3               | 0.00000      | 1.000  | conc  |
| 113 | o4               | 0.00000      | 1.000  | conc  |
| 114 | o5               | 3.238130E-38 | 1.000  | conc  |
| 115 | o6               | 0.00000      | 1.000  | conc  |
| 116 | o7               | 0.00000      | 1.000  | conc  |
| 117 | o8               | 1.655480E-37 | 1.000  | conc  |
| 118 | o9               | 4.515590E-37 | 1.000  | conc  |
| 119 | o10              | 0.00000      | 1.000  | conc  |
| 120 | o11              | 0.00000      | 1.000  | conc  |
| 121 | o12              | 5.727360E-36 | 1.000  | conc  |
| 122 | o13              | 3.627010E-37 | 1.000  | conc  |
| 123 | o14              | 0.00000      | 1.000  | conc  |
| 124 | o15              | 2.050830E-35 | 1.000  | conc  |
| 125 | o16              | 9.343950E-35 | 1.000  | conc  |
| 126 | o17              | 0.00000      | 1.000  | conc  |
| 127 | o18              | 0.00000      | 1.000  | conc  |
| 128 | o19              | 9.801770E-34 | 1.000  | conc  |
| 129 | o20              | 4.660000E-34 | 1.000  | conc  |
| 130 | o21              | 0.00000      | 1.000  | conc  |
| 131 | o22              | 1.878980E-33 | 1.000  | conc  |
| 132 | o23              | 1.850280E-32 | 1.000  | conc  |
| 133 | o24              | 0.00000      | 1.000  | conc  |
| 134 | o25              | 0.00000      | 1.000  | conc  |
| 135 | o26              | 1.611970E-31 | 1.000  | conc  |
| 136 | o27              | 1.509350E-31 | 1.000  | conc  |
| 137 | o28              | 0.00000      | 1.000  | conc  |
| 138 | o29              | 4.918830E-33 | 1.000  | conc  |
| 139 | o30              | 3.533770E-30 | 1.000  | conc  |
| 140 | o31              | 0.00000      | 1.000  | conc  |
| 141 | o32              | 0.00000      | 1.000  | conc  |
| 142 | o33              | 2.521790E-29 | 1.000  | conc  |
| 143 | o34              | 3.813090E-29 | 1.000  | conc  |
| 144 | o35              | 0.00000      | 1.000  | conc  |
| 145 | o36              | 0.00000      | 1.000  | conc  |
| 146 | o37              | 0.00000      | 1.000  | conc  |

|     |      |              |       |      |
|-----|------|--------------|-------|------|
| 147 | o38  | 0.00000      | 1.000 | conc |
| 148 | o39  | 0.00000      | 1.000 | conc |
| 149 | o40  | 2.530210E-28 | 1.000 | conc |
| 150 | o41  | 9.860960E-28 | 1.000 | conc |
| 151 | o42  | 0.00000      | 1.000 | conc |
| 152 | o43  | 0.00000      | 1.000 | conc |
| 153 | o44  | 9.379650E-27 | 1.000 | conc |
| 154 | o45  | 4.815690E-27 | 1.000 | conc |
| 155 | o46  | 0.00000      | 1.000 | conc |
| 156 | o47  | 1.648990E-26 | 1.000 | conc |
| 157 | o48  | 1.792110E-25 | 1.000 | conc |
| 158 | o49  | 0.00000      | 1.000 | conc |
| 159 | o50  | 0.00000      | 1.000 | conc |
| 160 | o51  | 1.535060E-24 | 1.000 | conc |
| 161 | o52  | 1.506930E-24 | 1.000 | conc |
| 162 | o53  | 0.00000      | 1.000 | conc |
| 163 | o54  | 0.00000      | 1.000 | conc |
| 164 | o55  | 3.412410E-23 | 1.000 | conc |
| 165 | o56  | 0.00000      | 1.000 | conc |
| 166 | o57  | 0.00000      | 1.000 | conc |
| 167 | o58  | 2.389050E-22 | 1.000 | conc |
| 168 | o59  | 3.756800E-22 | 1.000 | conc |
| 169 | o60  | 0.00000      | 1.000 | conc |
| 170 | o61  | 0.00000      | 1.000 | conc |
| 171 | o62  | 6.290950E-21 | 1.000 | conc |
| 172 | o63  | 0.00000      | 1.000 | conc |
| 173 | o64  | 0.00000      | 1.000 | conc |
| 174 | o65  | 3.461990E-20 | 1.000 | conc |
| 175 | o66  | 8.413140E-20 | 1.000 | conc |
| 176 | o67  | 0.00000      | 1.000 | conc |
| 177 | o68  | 0.00000      | 1.000 | conc |
| 178 | o69  | 1.123570E-18 | 1.000 | conc |
| 179 | o70  | 0.00000      | 1.000 | conc |
| 180 | o71  | 0.00000      | 1.000 | conc |
| 181 | o72  | 4.475000E-18 | 1.000 | conc |
| 182 | o73  | 1.764230E-17 | 1.000 | conc |
| 183 | o74  | 0.00000      | 1.000 | conc |
| 184 | o75  | 0.00000      | 1.000 | conc |
| 185 | o76  | 1.940590E-16 | 1.000 | conc |
| 186 | o77  | 7.127540E-17 | 1.000 | conc |
| 187 | o78  | 0.00000      | 1.000 | conc |
| 188 | o79  | 4.578440E-16 | 1.000 | conc |
| 189 | o80  | 3.529640E-15 | 1.000 | conc |
| 190 | o81  | 0.00000      | 1.000 | conc |
| 191 | o82  | 0.00000      | 1.000 | conc |
| 192 | o83  | 5.591460E-15 | 1.000 | conc |
| 193 | o84  | 5.097810E-14 | 1.000 | conc |
| 194 | o85  | 0.00000      | 1.000 | conc |
| 195 | o86  | 0.00000      | 1.000 | conc |
| 196 | o87  | 4.356530E-13 | 1.000 | conc |
| 197 | o88  | 4.052020E-13 | 1.000 | conc |
| 198 | o89  | 0.00000      | 1.000 | conc |
| 199 | o90  | 2.400000E-14 | 1.000 | conc |
| 200 | o91  | 9.530250E-12 | 1.000 | conc |
| 201 | o92  | 0.00000      | 1.000 | conc |
| 202 | o93  | 0.00000      | 1.000 | conc |
| 203 | o94  | 6.818530E-11 | 1.000 | conc |
| 204 | o95  | 1.025520E-10 | 1.000 | conc |
| 205 | o96  | 0.00000      | 1.000 | conc |
| 206 | o97  | 0.00000      | 1.000 | conc |
| 207 | o98  | 1.762580E-09 | 1.000 | conc |
| 208 | o99  | 0.00000      | 1.000 | conc |
| 209 | o100 | 0.00000      | 1.000 | conc |
| 210 | o101 | 9.966190E-09 | 1.000 | conc |
| 211 | o102 | 2.315860E-08 | 1.000 | conc |
| 212 | o103 | 0.00000      | 1.000 | conc |
| 213 | o104 | 0.00000      | 1.000 | conc |
| 214 | o105 | 3.158230E-07 | 1.000 | conc |
| 215 | o106 | 0.00000      | 1.000 | conc |
| 216 | o107 | 0.00000      | 1.000 | conc |
| 217 | o108 | 1.307490E-06 | 1.000 | conc |
| 218 | o109 | 4.883490E-06 | 1.000 | conc |
| 219 | o110 | 0.00000      | 1.000 | conc |

|     |      |              |       |      |
|-----|------|--------------|-------|------|
| 220 | o111 | 0.00000      | 1.000 | conc |
| 221 | o112 | 5.474160E-05 | 1.000 | conc |
| 222 | o113 | 1.780180E-05 | 1.000 | conc |
| 223 | o114 | 0.00000      | 1.000 | conc |
| 224 | o115 | 1.385330E-04 | 1.000 | conc |
| 225 | o116 | 9.811610E-04 | 1.000 | conc |
| 226 | o117 | 0.00000      | 1.000 | conc |
| 227 | o118 | 0.00000      | 1.000 | conc |
| 228 | o119 | 9.139440E-03 | 1.000 | conc |
| 229 | o120 | 6.972520E-03 | 1.000 | conc |
| 230 | o121 | 0.00000      | 1.000 | conc |
| 231 | o122 | 0.166320     | 1.000 | conc |
| 232 | o123 | 0.00000      | 1.000 | conc |
| 233 | o124 | 0.00000      | 1.000 | conc |
| 234 | o125 | 0.776139     | 1.000 | conc |
| 235 | o126 | 2.73776      | 1.000 | conc |
| 236 | o127 | 0.00000      | 1.000 | conc |
| 237 | o128 | 0.00000      | 1.000 | conc |
| 238 | o129 | 31.3458      | 1.000 | conc |
| 239 | o130 | 8.75085      | 1.000 | conc |
| 240 | o131 | 0.00000      | 1.000 | conc |
| 241 | o132 | 86.1408      | 1.000 | conc |
| 242 | o133 | 963.476      | 1.000 | conc |
| 243 | o134 | 1747.51      | 1.000 | conc |
| 244 | o135 | 3591.21      | 1.000 | conc |
| 245 | o136 | 9918.59      | 1.000 | conc |
| 246 | o137 | 15848.6      | 1.000 | conc |
| 247 | o138 | 15510.6      | 1.000 | conc |
| 248 | o139 | 40579.2      | 1.000 | conc |
| 249 | o140 | 107955.      | 1.000 | conc |
| 250 | o141 | 130437.      | 1.000 | conc |
| 251 | o142 | 87393.5      | 1.000 | conc |
| 252 | o143 | 113899.      | 1.000 | conc |
| 253 | o144 | 212482.      | 1.000 | conc |
| 254 | o145 | 250810.      | 1.000 | conc |
| 255 | o146 | 238335.      | 1.000 | conc |
| 256 | o147 | 246662.      | 1.000 | conc |
| 257 | o148 | 253421.      | 1.000 | conc |
| 258 | o149 | 228386.      | 1.000 | conc |
| 259 | o150 | 189898.      | 1.000 | conc |
| 260 | o151 | 171060.      | 1.000 | conc |
| 261 | o152 | 209249.      | 1.000 | conc |
| 262 | o153 | 263462.      | 1.000 | conc |
| 263 | o154 | 253026.      | 1.000 | conc |
| 264 | o155 | 213009.      | 1.000 | conc |
| 265 | o156 | 206588.      | 1.000 | conc |
| 266 | o157 | 237117.      | 1.000 | conc |
| 267 | o158 | 281729.      | 1.000 | conc |
| 268 | o159 | 295557.      | 1.000 | conc |
| 269 | o160 | 280600.      | 1.000 | conc |
| 270 | o161 | 280690.      | 1.000 | conc |
| 271 | o162 | 292713.      | 1.000 | conc |
| 272 | o163 | 292851.      | 1.000 | conc |
| 273 | o164 | 279875.      | 1.000 | conc |
| 274 | o165 | 258901.      | 1.000 | conc |
| 275 | o166 | 235046.      | 1.000 | conc |
| 276 | o167 | 213428.      | 1.000 | conc |
| 277 | o168 | 199164.      | 1.000 | conc |
| 278 | o169 | 197371.      | 1.000 | conc |
| 279 | o170 | 203306.      | 1.000 | conc |
| 280 | o171 | 170565.      | 1.000 | conc |
| 281 | o172 | 94276.1      | 1.000 | conc |
| 282 | o173 | 82388.0      | 1.000 | conc |
| 283 | o174 | 144291.      | 1.000 | conc |
| 284 | o175 | 161528.      | 1.000 | conc |
| 285 | o176 | 128019.      | 1.000 | conc |
| 286 | o177 | 108437.      | 1.000 | conc |
| 287 | o178 | 110262.      | 1.000 | conc |
| 288 | o179 | 121310.      | 1.000 | conc |
| 289 | o180 | 133760.      | 1.000 | conc |
| 290 | o181 | 139392.      | 1.000 | conc |
| 291 | o182 | 129247.      | 1.000 | conc |
| 292 | o183 | 116109.      | 1.000 | conc |

|     |      |         |       |      |
|-----|------|---------|-------|------|
| 293 | o184 | 126217. | 1.000 | conc |
| 294 | o185 | 139498. | 1.000 | conc |
| 295 | o186 | 126431. | 1.000 | conc |
| 296 | o187 | 110561. | 1.000 | conc |
| 297 | o188 | 110899. | 1.000 | conc |
| 298 | o189 | 109252. | 1.000 | conc |
| 299 | o190 | 99126.8 | 1.000 | conc |
| 300 | o191 | 92048.0 | 1.000 | conc |
| 301 | o192 | 89688.8 | 1.000 | conc |
| 302 | o193 | 88557.5 | 1.000 | conc |
| 303 | o194 | 94958.0 | 1.000 | conc |
| 304 | o195 | 107079. | 1.000 | conc |
| 305 | o196 | 91369.6 | 1.000 | conc |
| 306 | o197 | 46576.9 | 1.000 | conc |
| 307 | o198 | 25748.9 | 1.000 | conc |
| 308 | o199 | 33799.4 | 1.000 | conc |
| 309 | o200 | 35631.0 | 1.000 | conc |
| 310 | o201 | 28383.7 | 1.000 | conc |
| 311 | o202 | 23252.8 | 1.000 | conc |
| 312 | o203 | 26145.9 | 1.000 | conc |
| 313 | o204 | 36201.1 | 1.000 | conc |
| 314 | o205 | 41993.2 | 1.000 | conc |
| 315 | o206 | 42503.4 | 1.000 | conc |
| 316 | o207 | 49159.4 | 1.000 | conc |
| 317 | o208 | 59113.1 | 1.000 | conc |
| 318 | o209 | 53550.1 | 1.000 | conc |
| 319 | o210 | 42313.1 | 1.000 | conc |
| 320 | o211 | 49127.3 | 1.000 | conc |
| 321 | o212 | 59932.4 | 1.000 | conc |
| 322 | o213 | 57765.5 | 1.000 | conc |
| 323 | o214 | 59051.1 | 1.000 | conc |
| 324 | o215 | 71289.7 | 1.000 | conc |
| 325 | o216 | 78099.1 | 1.000 | conc |
| 326 | o217 | 74866.7 | 1.000 | conc |
| 327 | o218 | 69517.8 | 1.000 | conc |
| 328 | o219 | 70436.8 | 1.000 | conc |
| 329 | o220 | 82025.2 | 1.000 | conc |
| 330 | o221 | 92322.6 | 1.000 | conc |
| 331 | o222 | 93098.2 | 1.000 | conc |
| 332 | o223 | 93041.5 | 1.000 | conc |
| 333 | o224 | 100680. | 1.000 | conc |
| 334 | o225 | 120120. | 1.000 | conc |
| 335 | o226 | 135730. | 1.000 | conc |
| 336 | o227 | 127404. | 1.000 | conc |
| 337 | o228 | 121217. | 1.000 | conc |
| 338 | o229 | 136763. | 1.000 | conc |
| 339 | o230 | 129342. | 1.000 | conc |
| 340 | o231 | 88468.1 | 1.000 | conc |
| 341 | o232 | 70850.2 | 1.000 | conc |
| 342 | o233 | 80996.3 | 1.000 | conc |
| 343 | o234 | 79578.4 | 1.000 | conc |
| 344 | o235 | 71476.0 | 1.000 | conc |
| 345 | o236 | 74543.8 | 1.000 | conc |
| 346 | o237 | 73858.3 | 1.000 | conc |
| 347 | o238 | 60598.7 | 1.000 | conc |
| 348 | o239 | 54071.0 | 1.000 | conc |
| 349 | o240 | 58191.7 | 1.000 | conc |
| 350 | o241 | 57334.7 | 1.000 | conc |
| 351 | o242 | 52277.3 | 1.000 | conc |
| 352 | o243 | 52213.6 | 1.000 | conc |
| 353 | o244 | 53457.5 | 1.000 | conc |
| 354 | o245 | 51425.7 | 1.000 | conc |
| 355 | o246 | 50764.7 | 1.000 | conc |
| 356 | o247 | 52332.4 | 1.000 | conc |
| 357 | o248 | 49494.8 | 1.000 | conc |
| 358 | o249 | 41204.9 | 1.000 | conc |
| 359 | o250 | 31483.7 | 1.000 | conc |
| 360 | o251 | 24486.3 | 1.000 | conc |
| 361 | o252 | 21590.2 | 1.000 | conc |
| 362 | o253 | 18193.9 | 1.000 | conc |
| 363 | o254 | 13790.9 | 1.000 | conc |
| 364 | o255 | 13243.4 | 1.000 | conc |
| 365 | o256 | 14937.6 | 1.000 | conc |

|     |      |         |       |      |
|-----|------|---------|-------|------|
| 366 | o257 | 13632.5 | 1.000 | conc |
| 367 | o258 | 9520.91 | 1.000 | conc |
| 368 | o259 | 5061.07 | 1.000 | conc |
| 369 | o260 | 3493.82 | 1.000 | conc |
| 370 | o261 | 5447.37 | 1.000 | conc |
| 371 | o262 | 7290.70 | 1.000 | conc |
| 372 | o263 | 7251.73 | 1.000 | conc |
| 373 | o264 | 5666.69 | 1.000 | conc |
| 374 | o265 | 4002.47 | 1.000 | conc |
| 375 | o266 | 3705.62 | 1.000 | conc |
| 376 | o267 | 4079.18 | 1.000 | conc |
| 377 | o268 | 4342.79 | 1.000 | conc |
| 378 | o269 | 4657.45 | 1.000 | conc |
| 379 | o270 | 4709.12 | 1.000 | conc |
| 380 | o271 | 3662.07 | 1.000 | conc |
| 381 | o272 | 2533.16 | 1.000 | conc |
| 382 | o273 | 2971.71 | 1.000 | conc |
| 383 | o274 | 3480.80 | 1.000 | conc |
| 384 | o275 | 2837.98 | 1.000 | conc |
| 385 | o276 | 3585.37 | 1.000 | conc |
| 386 | o277 | 5772.33 | 1.000 | conc |
| 387 | o278 | 5009.78 | 1.000 | conc |
| 388 | o279 | 2281.37 | 1.000 | conc |
| 389 | o280 | 2563.73 | 1.000 | conc |
| 390 | o281 | 4521.34 | 1.000 | conc |
| 391 | o282 | 4986.85 | 1.000 | conc |
| 392 | o283 | 5110.52 | 1.000 | conc |
| 393 | o284 | 6018.91 | 1.000 | conc |
| 394 | o285 | 6769.64 | 1.000 | conc |
| 395 | o286 | 7514.82 | 1.000 | conc |
| 396 | o287 | 9606.69 | 1.000 | conc |
| 397 | o288 | 11461.7 | 1.000 | conc |
| 398 | o289 | 10743.1 | 1.000 | conc |
| 399 | o290 | 10720.9 | 1.000 | conc |
| 400 | o291 | 13733.1 | 1.000 | conc |
| 401 | o292 | 14813.8 | 1.000 | conc |
| 402 | o293 | 11710.4 | 1.000 | conc |
| 403 | o294 | 7841.36 | 1.000 | conc |
| 404 | o295 | 6105.19 | 1.000 | conc |
| 405 | o296 | 6112.11 | 1.000 | conc |
| 406 | o297 | 6769.24 | 1.000 | conc |
| 407 | o298 | 7018.63 | 1.000 | conc |
| 408 | o299 | 6603.01 | 1.000 | conc |
| 409 | o300 | 6064.89 | 1.000 | conc |
| 410 | o301 | 5981.44 | 1.000 | conc |
| 411 | o302 | 6769.91 | 1.000 | conc |
| 412 | o303 | 8101.42 | 1.000 | conc |
| 413 | o304 | 9429.78 | 1.000 | conc |
| 414 | o305 | 10216.6 | 1.000 | conc |
| 415 | o306 | 10232.1 | 1.000 | conc |
| 416 | o307 | 9650.45 | 1.000 | conc |
| 417 | o308 | 8673.18 | 1.000 | conc |
| 418 | o309 | 7502.49 | 1.000 | conc |
| 419 | o310 | 6345.57 | 1.000 | conc |
| 420 | o311 | 5411.55 | 1.000 | conc |
| 421 | o312 | 4907.69 | 1.000 | conc |
| 422 | o313 | 4888.55 | 1.000 | conc |
| 423 | o314 | 5145.72 | 1.000 | conc |
| 424 | o315 | 5444.77 | 1.000 | conc |
| 425 | o316 | 5566.72 | 1.000 | conc |
| 426 | o317 | 5430.42 | 1.000 | conc |
| 427 | o318 | 5027.17 | 1.000 | conc |
| 428 | o319 | 4349.18 | 1.000 | conc |
| 429 | o320 | 3446.13 | 1.000 | conc |
| 430 | o321 | 2499.34 | 1.000 | conc |
| 431 | o322 | 1708.47 | 1.000 | conc |
| 432 | o323 | 1259.21 | 1.000 | conc |
| 433 | o324 | 1157.75 | 1.000 | conc |
| 434 | o325 | 1285.64 | 1.000 | conc |
| 435 | o326 | 1521.98 | 1.000 | conc |
| 436 | o327 | 1760.85 | 1.000 | conc |
| 437 | o328 | 1942.61 | 1.000 | conc |
| 438 | o329 | 2016.51 | 1.000 | conc |

|     |      |         |       |      |
|-----|------|---------|-------|------|
| 439 | o330 | 1934.51 | 1.000 | conc |
| 440 | o331 | 1702.19 | 1.000 | conc |
| 441 | o332 | 1373.90 | 1.000 | conc |
| 442 | o333 | 1005.74 | 1.000 | conc |
| 443 | o334 | 649.533 | 1.000 | conc |
| 444 | o335 | 339.055 | 1.000 | conc |
| 445 | o336 | 103.355 | 1.000 | conc |
| 446 | o337 | 0.00000 | 1.000 | conc |
| 447 | o338 | 0.00000 | 1.000 | conc |
| 448 | o339 | 0.00000 | 1.000 | conc |
| 449 | o340 | 0.00000 | 1.000 | conc |
| 450 | o341 | 0.00000 | 1.000 | conc |
| 451 | o342 | 0.00000 | 1.000 | conc |
| 452 | o343 | 0.00000 | 1.000 | conc |
| 453 | o344 | 24.6039 | 1.000 | conc |
| 454 | o345 | 189.070 | 1.000 | conc |
| 455 | o346 | 371.669 | 1.000 | conc |
| 456 | o347 | 489.454 | 1.000 | conc |
| 457 | o348 | 467.298 | 1.000 | conc |
| 458 | o349 | 323.288 | 1.000 | conc |
| 459 | o350 | 136.783 | 1.000 | conc |
| 460 | o351 | 0.00000 | 1.000 | conc |
| 461 | o352 | 0.00000 | 1.000 | conc |
| 462 | o353 | 0.00000 | 1.000 | conc |
| 463 | o354 | 0.00000 | 1.000 | conc |
| 464 | o355 | 15.9872 | 1.000 | conc |
| 465 | o356 | 27.6263 | 1.000 | conc |
| 466 | o357 | 20.8621 | 1.000 | conc |
| 467 | o358 | 0.00000 | 1.000 | conc |
| 468 | o359 | 0.00000 | 1.000 | conc |
| 469 | o360 | 0.00000 | 1.000 | conc |
| 470 | o361 | 0.00000 | 1.000 | conc |
| 471 | o362 | 38.6360 | 1.000 | conc |
| 472 | o363 | 161.098 | 1.000 | conc |
| 473 | o364 | 316.812 | 1.000 | conc |
| 474 | o365 | 483.800 | 1.000 | conc |
| 475 | o366 | 642.739 | 1.000 | conc |
| 476 | o367 | 788.596 | 1.000 | conc |
| 477 | o368 | 921.125 | 1.000 | conc |
| 478 | o369 | 1039.77 | 1.000 | conc |
| 479 | o370 | 1127.28 | 1.000 | conc |
| 480 | o371 | 1141.63 | 1.000 | conc |
| 481 | o372 | 1038.82 | 1.000 | conc |
| 482 | o373 | 787.834 | 1.000 | conc |
| 483 | o374 | 454.309 | 1.000 | conc |
| 484 | o375 | 147.371 | 1.000 | conc |
| 485 | o376 | 0.00000 | 1.000 | conc |
| 486 | o377 | 0.00000 | 1.000 | conc |
| 487 | o378 | 178.614 | 1.000 | conc |
| 488 | o379 | 464.396 | 1.000 | conc |
| 489 | o380 | 806.740 | 1.000 | conc |
| 490 | o381 | 1155.84 | 1.000 | conc |
| 491 | o382 | 1461.89 | 1.000 | conc |
| 492 | o383 | 1676.50 | 1.000 | conc |
| 493 | o384 | 1760.11 | 1.000 | conc |
| 494 | o385 | 1676.55 | 1.000 | conc |
| 495 | o386 | 1390.50 | 1.000 | conc |
| 496 | o387 | 931.442 | 1.000 | conc |
| 497 | o388 | 437.972 | 1.000 | conc |
| 498 | o389 | 59.1618 | 1.000 | conc |
| 499 | o390 | 0.00000 | 1.000 | conc |
| 500 | o391 | 26.7570 | 1.000 | conc |
| 501 | o392 | 267.289 | 1.000 | conc |
| 502 | o393 | 557.398 | 1.000 | conc |
| 503 | o394 | 817.031 | 1.000 | conc |
| 504 | o395 | 991.351 | 1.000 | conc |
| 505 | o396 | 1028.94 | 1.000 | conc |
| 506 | o397 | 885.073 | 1.000 | conc |
| 507 | o398 | 598.276 | 1.000 | conc |
| 508 | o399 | 263.623 | 1.000 | conc |
| 509 | o400 | 0.00000 | 1.000 | conc |
| 510 | o401 | 0.00000 | 1.000 | conc |
| 511 | o402 | 0.00000 | 1.000 | conc |

|     |      |         |       |      |
|-----|------|---------|-------|------|
| 512 | o403 | 0.00000 | 1.000 | conc |
| 513 | o404 | 152.637 | 1.000 | conc |
| 514 | o405 | 486.728 | 1.000 | conc |
| 515 | o406 | 803.196 | 1.000 | conc |
| 516 | o407 | 999.271 | 1.000 | conc |
| 517 | o408 | 1001.11 | 1.000 | conc |
| 518 | o409 | 853.094 | 1.000 | conc |
| 519 | o410 | 629.831 | 1.000 | conc |
| 520 | o411 | 404.922 | 1.000 | conc |
| 521 | o412 | 221.358 | 1.000 | conc |
| 522 | o413 | 86.4305 | 1.000 | conc |
| 523 | o414 | 5.41412 | 1.000 | conc |
| 524 | o415 | 0.00000 | 1.000 | conc |
| 525 | o416 | 0.00000 | 1.000 | conc |
| 526 | o417 | 1.83637 | 1.000 | conc |
| 527 | o418 | 0.00000 | 1.000 | conc |
| 528 | o419 | 20.0022 | 1.000 | conc |
| 529 | o420 | 167.357 | 1.000 | conc |
| 530 | o421 | 356.022 | 1.000 | conc |
| 531 | o422 | 487.104 | 1.000 | conc |
| 532 | o423 | 472.761 | 1.000 | conc |
| 533 | o424 | 331.322 | 1.000 | conc |
| 534 | o425 | 140.303 | 1.000 | conc |
| 535 | o426 | 0.00000 | 1.000 | conc |
| 536 | o427 | 0.00000 | 1.000 | conc |
| 537 | o428 | 0.00000 | 1.000 | conc |
| 538 | o429 | 0.00000 | 1.000 | conc |
| 539 | o430 | 77.2770 | 1.000 | conc |
| 540 | o431 | 224.980 | 1.000 | conc |
| 541 | o432 | 377.267 | 1.000 | conc |
| 542 | o433 | 507.381 | 1.000 | conc |
| 543 | o434 | 591.128 | 1.000 | conc |
| 544 | o435 | 612.737 | 1.000 | conc |
| 545 | o436 | 558.166 | 1.000 | conc |
| 546 | o437 | 415.570 | 1.000 | conc |
| 547 | o438 | 220.447 | 1.000 | conc |
| 548 | o439 | 53.8837 | 1.000 | conc |
| 549 | o440 | 0.00000 | 1.000 | conc |
| 550 | o441 | 108.455 | 1.000 | conc |
| 551 | o442 | 303.139 | 1.000 | conc |
| 552 | o443 | 466.067 | 1.000 | conc |
| 553 | o444 | 483.141 | 1.000 | conc |
| 554 | o445 | 338.699 | 1.000 | conc |
| 555 | o446 | 141.219 | 1.000 | conc |
| 556 | o447 | 7.10519 | 1.000 | conc |
| 557 | o448 | 31.8670 | 1.000 | conc |
| 558 | o449 | 183.043 | 1.000 | conc |
| 559 | o450 | 379.758 | 1.000 | conc |
| 560 | o451 | 541.471 | 1.000 | conc |
| 561 | o452 | 618.586 | 1.000 | conc |
| 562 | o453 | 612.838 | 1.000 | conc |
| 563 | o454 | 530.791 | 1.000 | conc |
| 564 | o455 | 382.484 | 1.000 | conc |
| 565 | o456 | 207.541 | 1.000 | conc |
| 566 | o457 | 60.5508 | 1.000 | conc |
| 567 | o458 | 0.00000 | 1.000 | conc |
| 568 | o459 | 46.1642 | 1.000 | conc |
| 569 | o460 | 192.871 | 1.000 | conc |
| 570 | o461 | 411.737 | 1.000 | conc |
| 571 | o462 | 675.194 | 1.000 | conc |
| 572 | o463 | 918.134 | 1.000 | conc |
| 573 | o464 | 1050.34 | 1.000 | conc |
| 574 | o465 | 981.197 | 1.000 | conc |
| 575 | o466 | 681.595 | 1.000 | conc |
| 576 | o467 | 304.360 | 1.000 | conc |
| 577 | o468 | 35.7788 | 1.000 | conc |
| 578 | o469 | 51.8214 | 1.000 | conc |
| 579 | o470 | 338.819 | 1.000 | conc |
| 580 | o471 | 716.697 | 1.000 | conc |
| 581 | o472 | 999.732 | 1.000 | conc |
| 582 | o473 | 1047.59 | 1.000 | conc |
| 583 | o474 | 902.303 | 1.000 | conc |
| 584 | o475 | 651.723 | 1.000 | conc |



|     |      |         |       |      |
|-----|------|---------|-------|------|
| 585 | o476 | 382.911 | 1.000 | conc |
| 586 | o477 | 159.502 | 1.000 | conc |
| 587 | o478 | 18.2148 | 1.000 | conc |
| 588 | o479 | 0.00000 | 1.000 | conc |
| 589 | o480 | 107.393 | 1.000 | conc |
| 590 | o481 | 291.838 | 1.000 | conc |
| 591 | o482 | 452.788 | 1.000 | conc |
| 592 | o483 | 496.542 | 1.000 | conc |
| 593 | o484 | 393.985 | 1.000 | conc |
| 594 | o485 | 213.383 | 1.000 | conc |
| 595 | o486 | 31.0702 | 1.000 | conc |
| 596 | o487 | 0.00000 | 1.000 | conc |
| 597 | o488 | 0.00000 | 1.000 | conc |
| 598 | o489 | 0.00000 | 1.000 | conc |
| 599 | o490 | 30.4946 | 1.000 | conc |
| 600 | o491 | 180.699 | 1.000 | conc |
| 601 | o492 | 340.231 | 1.000 | conc |
| 602 | o493 | 471.098 | 1.000 | conc |
| 603 | o494 | 538.884 | 1.000 | conc |
| 604 | o495 | 547.549 | 1.000 | conc |
| 605 | o496 | 524.384 | 1.000 | conc |
| 606 | o497 | 496.995 | 1.000 | conc |
| 607 | o498 | 484.919 | 1.000 | conc |
| 608 | o499 | 486.180 | 1.000 | conc |
| 609 | o500 | 495.254 | 1.000 | conc |

610  
611

612 Control settings:-

613

|     |                                                              |               |
|-----|--------------------------------------------------------------|---------------|
| 614 | Initial lambda                                               | : 10.000      |
| 615 | Lambda adjustment factor                                     | : 2.0000      |
| 616 | Sufficient new/old phi ratio per optimisation iteration      | : 0.30000     |
| 617 | Limiting relative phi reduction between lambdas              | : 1.00000E-02 |
| 618 | Maximum trial lambdas per iteration                          | : 8           |
| 619 | Forgive model run failure during lamda testing               | : yes         |
| 620 | Forgive model run failure during Jacobian runs               | : yes         |
| 621 |                                                              |               |
| 622 | Perform Broyden's update of Jacobian matrix                  | : no          |
| 623 | Undertake observation re-referencing                         | : no          |
| 624 |                                                              |               |
| 625 | Maximum factor parameter change (factor-limited changes)     | : 10.000      |
| 626 | Maximum relative parameter change (relative-limited changes) | : na          |
| 627 | Fraction of initial parameter values used in computing       |               |
| 628 | change limit for near-zero parameters                        | : 1.00000E-03 |
| 629 | Allow bending of parameter upgrade vector                    | : no          |
| 630 | Allow parameters to stick to their bounds                    | : no          |
| 631 |                                                              |               |
| 632 | Relative phi reduction below which to begin use of           |               |
| 633 | central derivatives                                          | : 0.10000     |
| 634 | Iteration at which to first consider derivatives switch      | : 1           |
| 635 |                                                              |               |
| 636 | Relative phi reduction indicating convergence                | : 0.50000E-02 |
| 637 | Number of phi values required within this range              | : 4           |
| 638 | Maximum number of consecutive failures to lower phi          | : 4           |
| 639 | Minimal relative parameter change indicating convergence     | : 0.50000E-02 |
| 640 | Number of consecutive iterations with minimal param change   | : 4           |
| 641 | Maximum number of optimisation iterations                    | : 200         |
| 642 |                                                              |               |
| 643 | Attempt automatic user intervention                          | : no          |
| 644 |                                                              |               |
| 645 | Attempt reuse of parameter sensitivities                     | : no          |
| 646 |                                                              |               |
| 647 | Scale parameters by their bounds                             | : yes         |

648  
649

650 File saving options: -

651

|     |                         |       |
|-----|-------------------------|-------|
| 652 | Save best JCO file      | : yes |
| 653 | Save multiple JCO files | : no  |
| 654 | Save multiple REI files | : no  |
| 655 | Save multiple PAR files | : yes |

656  
657

# OPTIMISATION RECORD

## INITIAL CONDITIONS:

Sum of squared weighted residuals (ie phi) = 1.02166E+11

### Current parameter values

|    |              |
|----|--------------|
| h1 | 80.0000      |
| s1 | 2500.00      |
| p1 | 0.850000     |
| o1 | 3.300000E-04 |
| h2 | 130.000      |
| s2 | 750.000      |
| p2 | 0.780000     |
| o2 | 1.600000E-05 |
| h3 | 170.000      |
| s3 | 800.000      |
| p3 | 0.300000     |
| o3 | 3.500000E-05 |

OPTIMISATION ITERATION NO. : 1

Model calls so far : 1

Derivative model calls so far : 0

Starting phi for this iteration: 1.02166E+11

Lambda = 10.000 ----->

Phi = 8.52511E+10 ( 0.834 of starting phi)

Lambda = 5.0000 ----->

Phi = 8.52511E+10 ( 0.834 of starting phi)

No more lambdas: relative phi reduction between lambdas less than 0.0100

Lowest phi this iteration: 8.52511E+10

### Current parameter values

|    |              |
|----|--------------|
| h1 | 80.5239      |
| s1 | 5000.00      |
| p1 | 0.852430     |
| o1 | 3.556670E-04 |
| h2 | 129.535      |
| s2 | 710.842      |
| p2 | 0.800274     |
| o2 | 1.532551E-05 |
| h3 | 167.684      |
| s3 | 782.079      |
| p3 | 0.299536     |
| o3 | 3.762602E-05 |

### Previous parameter values

|    |              |
|----|--------------|
| h1 | 80.0000      |
| s1 | 2500.00      |
| p1 | 0.850000     |
| o1 | 3.300000E-04 |
| h2 | 130.000      |
| s2 | 750.000      |
| p2 | 0.780000     |
| o2 | 1.600000E-05 |
| h3 | 170.000      |
| s3 | 800.000      |
| p3 | 0.300000     |
| o3 | 3.500000E-05 |

Maximum factor change: 2.000 ["s1"]

Maximum relative change: 1.000 ["s1"]

OPTIMISATION ITERATION NO. : 2

Model calls so far : 9

Derivative model calls so far : 1

Starting phi for this iteration: 8.52511E+10

param "s1" frozen: gradient and update vectors out of bounds

Lambda = 5.0000 ----->

Phi = 8.46248E+10 ( 0.993 of starting phi)

Lambda = 2.5000 ----->

Phi = 8.46248E+10 ( 0.993 of starting phi)

No more lambdas: relative phi reduction between lambdas less than 0.0100

Lowest phi this iteration: 8.46248E+10

Relative phi reduction between optimisation iterations less than 0.1000

Switch to higher order derivatives calculation

### Current parameter values

|    |          |
|----|----------|
| h1 | 80.8050  |
| s1 | 5000.00  |
| p1 | 0.855389 |

### Previous parameter values

|    |          |
|----|----------|
| h1 | 80.5239  |
| s1 | 5000.00  |
| p1 | 0.852430 |

```

731      o1      3.357590E-04      o1      3.556670E-04
732      h2      129.564      h2      129.535
733      s2      737.552      s2      710.842
734      p2      0.777974      p2      0.800274
735      o2      1.624590E-05      o2      1.532551E-05
736      h3      167.733      h3      167.684
737      s3      806.636      s3      782.079
738      p3      0.299353      p3      0.299536
739      o3      3.474980E-05      o3      3.762602E-05
740      Maximum factor change: 1.083      ["o3"]
741      Maximum relative change: 7.6442E-02      ["o3"]
742
743
744      OPTIMISATION ITERATION NO.      : 3
745      Model calls so far      : 17
746      Derivative model calls so far      : 2
747      Starting phi for this iteration: 8.46248E+10
748      All frozen parameters freed.
749
750      Lambda = 2.5000      ----->
751      Phi = 8.46678E+10      ( 1.001 times starting phi)
752
753      Lambda = 1.2500      ----->
754      Phi = 8.46678E+10      ( 1.001 times starting phi)
755
756      No more lambdas: relative phi reduction between lambdas less than 0.0100
757      Lowest phi this iteration: 8.46678E+10
758
759      Current parameter values      Previous parameter values
760      h1      80.9645      h1      80.8050
761      s1      4675.20      s1      5000.00
762      p1      0.856556      p1      0.855389
763      o1      3.258279E-04      o1      3.357590E-04
764      h2      129.573      h2      129.564
765      s2      743.722      s2      737.552
766      p2      0.764592      p2      0.777974
767      o2      1.670360E-05      o2      1.624590E-05
768      h3      167.726      h3      167.733
769      s3      805.880      s3      806.636
770      p3      0.299232      p3      0.299353
771      o3      3.459782E-05      o3      3.474980E-05
772      Maximum factor change: 1.069      ["s1"]
773      Maximum relative change: 6.4960E-02      ["s1"]
774
775
776      OPTIMISATION ITERATION NO.      : 4
777      Model calls so far      : 31
778      Derivative model calls so far      : 3
779      Starting phi for this iteration: 8.46678E+10
780
781      Lambda = 1.2500      ----->
782      Phi = 8.46335E+10      ( 1.000 of starting phi)
783
784      Lambda = 0.62500      ----->
785      Phi = 8.46335E+10      ( 1.000 of starting phi)
786
787      No more lambdas: relative phi reduction between lambdas less than 0.0100
788      Lowest phi this iteration: 8.46335E+10
789
790      Current parameter values      Previous parameter values
791      h1      80.9315      h1      80.9645
792      s1      4834.87      s1      4675.20
793      p1      0.856226      p1      0.856556
794      o1      3.276094E-04      o1      3.258279E-04
795      h2      129.570      h2      129.573
796      s2      743.251      s2      743.722
797      p2      0.764466      p2      0.764592
798      o2      1.664407E-05      o2      1.670360E-05
799      h3      167.726      h3      167.726
800      s3      804.159      s3      805.880
801      p3      0.299229      p3      0.299232
802      o3      3.444588E-05      o3      3.459782E-05
803      Maximum factor change: 1.034      ["s1"]

```

```

804 Maximum relative change: 3.4153E-02 ["s1"]
805
806
807 OPTIMISATION ITERATION NO. : 5
808 Model calls so far : 45
809 Derivative model calls so far : 4
810 Starting phi for this iteration: 8.46335E+10
811
812 Lambda = 0.62500 ----->
813 Phi = 8.46235E+10 ( 1.000 of starting phi)
814
815 Lambda = 0.31250 ----->
816 Phi = 8.46235E+10 ( 1.000 of starting phi)
817
818 No more lambdas: relative phi reduction between lambdas less than 0.0100
819 Lowest phi this iteration: 8.46235E+10
820
821 Current parameter values Previous parameter values
822 h1 80.9145 h1 80.9315
823 s1 4974.34 s1 4834.87
824 p1 0.856013 p1 0.856226
825 o1 3.285186E-04 o1 3.276094E-04
826 h2 129.568 h2 129.570
827 s2 743.390 s2 743.251
828 p2 0.761307 p2 0.764466
829 o2 1.663139E-05 o2 1.664407E-05
830 h3 167.725 h3 167.726
831 s3 799.611 s3 804.159
832 p3 0.299194 p3 0.299229
833 o3 3.407141E-05 o3 3.444588E-05
834 Maximum factor change: 1.029 ["s1"]
835 Maximum relative change: 2.8846E-02 ["s1"]
836
837 Optimisation complete: the 4 lowest phi's are within a relative distance
838 of eachother of 5.000E-03
839 Total model calls: 59
840
841 The model has been run one final time using best parameters.
842 Thus all model input files contain best parameter values, and model
843 output files contain model results based on these parameters.
844
845
846 OPTIMISATION RESULTS
847
848 Covariance matrix and parameter confidence intervals cannot be determined:-
849 Memory conservation is operative so that covariance matrix is not calculated.
850
851
852 Parameters ----->
853
854 Parameter Estimated value
855 h1 80.9145
856 s1 4974.34
857 p1 0.856013
858 o1 3.285186E-04
859 h2 129.568
860 s2 743.390
861 p2 0.761307
862 o2 1.663139E-05
863 h3 167.725
864 s3 799.611
865 p3 0.299194
866 o3 3.407141E-05
867
868 See file mfit.sen for parameter sensitivities.
869
870
871 Observations ----->
872
873 Observation Measured Calculated Residual Weight Group
874 value value
875 o1 1.762070E-39 0.00000 1.762070E-39 1.000
876 conc

```

|     |      |              |         |              |       |
|-----|------|--------------|---------|--------------|-------|
| 876 | o2   | 2.325900E-39 | 0.00000 | 2.325900E-39 | 1.000 |
|     | conc |              |         |              |       |
| 877 | o3   | 0.00000      | 0.00000 | 0.00000      | 1.000 |
|     | conc |              |         |              |       |
| 878 | o4   | 0.00000      | 0.00000 | 0.00000      | 1.000 |
|     | conc |              |         |              |       |
| 879 | o5   | 3.238130E-38 | 0.00000 | 3.238130E-38 | 1.000 |
|     | conc |              |         |              |       |
| 880 | o6   | 0.00000      | 0.00000 | 0.00000      | 1.000 |
|     | conc |              |         |              |       |
| 881 | o7   | 0.00000      | 0.00000 | 0.00000      | 1.000 |
|     | conc |              |         |              |       |
| 882 | o8   | 1.655480E-37 | 0.00000 | 1.655480E-37 | 1.000 |
|     | conc |              |         |              |       |
| 883 | o9   | 4.515590E-37 | 0.00000 | 4.515590E-37 | 1.000 |
|     | conc |              |         |              |       |
| 884 | o10  | 0.00000      | 0.00000 | 0.00000      | 1.000 |
|     | conc |              |         |              |       |
| 885 | o11  | 0.00000      | 0.00000 | 0.00000      | 1.000 |
|     | conc |              |         |              |       |
| 886 | o12  | 5.727360E-36 | 0.00000 | 5.727360E-36 | 1.000 |
|     | conc |              |         |              |       |
| 887 | o13  | 3.627010E-37 | 0.00000 | 3.627010E-37 | 1.000 |
|     | conc |              |         |              |       |
| 888 | o14  | 0.00000      | 0.00000 | 0.00000      | 1.000 |
|     | conc |              |         |              |       |
| 889 | o15  | 2.050830E-35 | 0.00000 | 2.050830E-35 | 1.000 |
|     | conc |              |         |              |       |
| 890 | o16  | 9.343950E-35 | 0.00000 | 9.343950E-35 | 1.000 |
|     | conc |              |         |              |       |
| 891 | o17  | 0.00000      | 0.00000 | 0.00000      | 1.000 |
|     | conc |              |         |              |       |
| 892 | o18  | 0.00000      | 0.00000 | 0.00000      | 1.000 |
|     | conc |              |         |              |       |
| 893 | o19  | 9.801770E-34 | 0.00000 | 9.801770E-34 | 1.000 |
|     | conc |              |         |              |       |
| 894 | o20  | 4.660000E-34 | 0.00000 | 4.660000E-34 | 1.000 |
|     | conc |              |         |              |       |
| 895 | o21  | 0.00000      | 0.00000 | 0.00000      | 1.000 |
|     | conc |              |         |              |       |
| 896 | o22  | 1.878980E-33 | 0.00000 | 1.878980E-33 | 1.000 |
|     | conc |              |         |              |       |
| 897 | o23  | 1.850280E-32 | 0.00000 | 1.850280E-32 | 1.000 |
|     | conc |              |         |              |       |
| 898 | o24  | 0.00000      | 0.00000 | 0.00000      | 1.000 |
|     | conc |              |         |              |       |
| 899 | o25  | 0.00000      | 0.00000 | 0.00000      | 1.000 |
|     | conc |              |         |              |       |
| 900 | o26  | 1.611970E-31 | 0.00000 | 1.611970E-31 | 1.000 |
|     | conc |              |         |              |       |
| 901 | o27  | 1.509350E-31 | 0.00000 | 1.509350E-31 | 1.000 |
|     | conc |              |         |              |       |
| 902 | o28  | 0.00000      | 0.00000 | 0.00000      | 1.000 |
|     | conc |              |         |              |       |
| 903 | o29  | 4.918830E-33 | 0.00000 | 4.918830E-33 | 1.000 |
|     | conc |              |         |              |       |
| 904 | o30  | 3.533770E-30 | 0.00000 | 3.533770E-30 | 1.000 |
|     | conc |              |         |              |       |
| 905 | o31  | 0.00000      | 0.00000 | 0.00000      | 1.000 |
|     | conc |              |         |              |       |
| 906 | o32  | 0.00000      | 0.00000 | 0.00000      | 1.000 |
|     | conc |              |         |              |       |
| 907 | o33  | 2.521790E-29 | 0.00000 | 2.521790E-29 | 1.000 |
|     | conc |              |         |              |       |
| 908 | o34  | 3.813090E-29 | 0.00000 | 3.813090E-29 | 1.000 |
|     | conc |              |         |              |       |
| 909 | o35  | 0.00000      | 0.00000 | 0.00000      | 1.000 |
|     | conc |              |         |              |       |
| 910 | o36  | 0.00000      | 0.00000 | 0.00000      | 1.000 |
|     | conc |              |         |              |       |
| 911 | o37  | 0.00000      | 0.00000 | 0.00000      | 1.000 |
|     | conc |              |         |              |       |
| 912 | o38  | 0.00000      | 0.00000 | 0.00000      | 1.000 |

|     |             |              |              |               |       |
|-----|-------------|--------------|--------------|---------------|-------|
| 913 | conc<br>o39 | 0.00000      | 6.035659-314 | -6.035659-314 | 1.000 |
| 914 | conc<br>o40 | 2.530210E-28 | 7.305196-303 | 2.530210E-28  | 1.000 |
| 915 | conc<br>o41 | 9.860960E-28 | 2.504729-292 | 9.860960E-28  | 1.000 |
| 916 | conc<br>o42 | 0.00000      | 2.657874-282 | -2.657874-282 | 1.000 |
| 917 | conc<br>o43 | 0.00000      | 9.459494-273 | -9.459494-273 | 1.000 |
| 918 | conc<br>o44 | 9.379650E-27 | 1.214945-263 | 9.379650E-27  | 1.000 |
| 919 | conc<br>o45 | 4.815690E-27 | 6.020295-255 | 4.815690E-27  | 1.000 |
| 920 | conc<br>o46 | 0.00000      | 1.223449-246 | -1.223449-246 | 1.000 |
| 921 | conc<br>o47 | 1.648990E-26 | 1.078387-238 | 1.648990E-26  | 1.000 |
| 922 | conc<br>o48 | 1.792110E-25 | 4.340129-231 | 1.792110E-25  | 1.000 |
| 923 | conc<br>o49 | 0.00000      | 8.361718-224 | -8.361718-224 | 1.000 |
| 924 | conc<br>o50 | 0.00000      | 8.054920-217 | -8.054920-217 | 1.000 |
| 925 | conc<br>o51 | 1.535060E-24 | 4.038750-210 | 1.535060E-24  | 1.000 |
| 926 | conc<br>o52 | 1.506930E-24 | 1.093899-203 | 1.506930E-24  | 1.000 |
| 927 | conc<br>o53 | 0.00000      | 1.656445-197 | -1.656445-197 | 1.000 |
| 928 | conc<br>o54 | 0.00000      | 1.447710-191 | -1.447710-191 | 1.000 |
| 929 | conc<br>o55 | 3.412410E-23 | 7.521997-186 | 3.412410E-23  | 1.000 |
| 930 | conc<br>o56 | 0.00000      | 2.388194-180 | -2.388194-180 | 1.000 |
| 931 | conc<br>o57 | 0.00000      | 4.753374-175 | -4.753374-175 | 1.000 |
| 932 | conc<br>o58 | 2.389050E-22 | 6.074144-170 | 2.389050E-22  | 1.000 |
| 933 | conc<br>o59 | 3.756800E-22 | 5.095428-165 | 3.756800E-22  | 1.000 |
| 934 | conc<br>o60 | 0.00000      | 2.864933-160 | -2.864933-160 | 1.000 |
| 935 | conc<br>o61 | 0.00000      | 1.100849-155 | -1.100849-155 | 1.000 |
| 936 | conc<br>o62 | 6.290950E-21 | 2.943906-151 | 6.290950E-21  | 1.000 |
| 937 | conc<br>o63 | 0.00000      | 5.573274-147 | -5.573274-147 | 1.000 |
| 938 | conc<br>o64 | 0.00000      | 7.589918-143 | -7.589918-143 | 1.000 |
| 939 | conc<br>o65 | 3.461990E-20 | 7.547990-139 | 3.461990E-20  | 1.000 |
| 940 | conc<br>o66 | 8.413140E-20 | 5.559419-135 | 8.413140E-20  | 1.000 |
| 941 | conc<br>o67 | 0.00000      | 3.073301-131 | -3.073301-131 | 1.000 |
| 942 | conc<br>o68 | 0.00000      | 1.291210-127 | -1.291210-127 | 1.000 |
| 943 | conc<br>o69 | 1.123570E-18 | 4.171870-124 | 1.123570E-18  | 1.000 |
| 944 | conc<br>o70 | 0.00000      | 1.048198-120 | -1.048198-120 | 1.000 |
| 945 | conc<br>o71 | 0.00000      | 2.069672-117 | -2.069672-117 | 1.000 |
| 946 | conc<br>o72 | 4.475000E-18 | 3.243555-114 | 4.475000E-18  | 1.000 |
| 947 | conc<br>o73 | 1.764230E-17 | 4.072719-111 | 1.764230E-17  | 1.000 |
| 948 | conc<br>o74 | 0.00000      | 4.133847-108 | -4.133847-108 | 1.000 |

|     |              |              |              |               |       |
|-----|--------------|--------------|--------------|---------------|-------|
| 949 | o75<br>conc  | 0.00000      | 3.420508-105 | -3.420508-105 | 1.000 |
| 950 | o76<br>conc  | 1.940590E-16 | 2.325743-102 | 1.940590E-16  | 1.000 |
| 951 | o77<br>conc  | 7.127540E-17 | 1.309358E-99 | 7.127540E-17  | 1.000 |
| 952 | o78<br>conc  | 0.00000      | 6.147568E-97 | -6.147568E-97 | 1.000 |
| 953 | o79<br>conc  | 4.578440E-16 | 2.423614E-94 | 4.578440E-16  | 1.000 |
| 954 | o80<br>conc  | 3.529640E-15 | 8.075294E-92 | 3.529640E-15  | 1.000 |
| 955 | o81<br>conc  | 0.00000      | 2.288072E-89 | -2.288072E-89 | 1.000 |
| 956 | o82<br>conc  | 0.00000      | 5.545611E-87 | -5.545611E-87 | 1.000 |
| 957 | o83<br>conc  | 5.591460E-15 | 1.156186E-84 | 5.591460E-15  | 1.000 |
| 958 | o84<br>conc  | 5.097810E-14 | 2.084589E-82 | 5.097810E-14  | 1.000 |
| 959 | o85<br>conc  | 0.00000      | 3.266892E-80 | -3.266892E-80 | 1.000 |
| 960 | o86<br>conc  | 0.00000      | 4.471739E-78 | -4.471739E-78 | 1.000 |
| 961 | o87<br>conc  | 4.356530E-13 | 5.371000E-76 | 4.356530E-13  | 1.000 |
| 962 | o88<br>conc  | 4.052020E-13 | 5.685782E-74 | 4.052020E-13  | 1.000 |
| 963 | o89<br>conc  | 0.00000      | 5.327397E-72 | -5.327397E-72 | 1.000 |
| 964 | o90<br>conc  | 2.400000E-14 | 4.435909E-70 | 2.400000E-14  | 1.000 |
| 965 | o91<br>conc  | 9.530250E-12 | 3.295105E-68 | 9.530250E-12  | 1.000 |
| 966 | o92<br>conc  | 0.00000      | 2.191690E-66 | -2.191690E-66 | 1.000 |
| 967 | o93<br>conc  | 0.00000      | 1.309929E-64 | -1.309929E-64 | 1.000 |
| 968 | o94<br>conc  | 6.818530E-11 | 7.059044E-63 | 6.818530E-11  | 1.000 |
| 969 | o95<br>conc  | 1.025520E-10 | 3.440988E-61 | 1.025520E-10  | 1.000 |
| 970 | o96<br>conc  | 0.00000      | 1.521986E-59 | -1.521986E-59 | 1.000 |
| 971 | o97<br>conc  | 0.00000      | 6.126662E-58 | -6.126662E-58 | 1.000 |
| 972 | o98<br>conc  | 1.762580E-09 | 2.250954E-56 | 1.762580E-09  | 1.000 |
| 973 | o99<br>conc  | 0.00000      | 7.568886E-55 | -7.568886E-55 | 1.000 |
| 974 | o100<br>conc | 0.00000      | 2.335426E-53 | -2.335426E-53 | 1.000 |
| 975 | o101<br>conc | 9.966190E-09 | 6.629340E-52 | 9.966190E-09  | 1.000 |
| 976 | o102<br>conc | 2.315860E-08 | 1.735413E-50 | 2.315860E-08  | 1.000 |
| 977 | o103<br>conc | 0.00000      | 4.199768E-49 | -4.199768E-49 | 1.000 |
| 978 | o104<br>conc | 0.00000      | 9.515132E-48 | -9.515132E-48 | 1.000 |
| 979 | o105<br>conc | 3.158230E-07 | 3.666833E-46 | 3.158230E-07  | 1.000 |
| 980 | o106<br>conc | 0.00000      | 2.172860E-43 | -2.172860E-43 | 1.000 |
| 981 | o107<br>conc | 0.00000      | 1.991626E-40 | -1.991626E-40 | 1.000 |
| 982 | o108<br>conc | 1.307490E-06 | 1.395963E-37 | 1.307490E-06  | 1.000 |
| 983 | o109<br>conc | 4.883490E-06 | 7.416672E-35 | 4.883490E-06  | 1.000 |
| 984 | o110<br>conc | 0.00000      | 3.008470E-32 | -3.008470E-32 | 1.000 |
| 985 | o111         | 0.00000      | 9.385026E-30 | -9.385026E-30 | 1.000 |

|      |              |              |              |               |       |
|------|--------------|--------------|--------------|---------------|-------|
| 986  | conc<br>o112 | 5.474160E-05 | 2.267373E-27 | 5.474160E-05  | 1.000 |
| 987  | conc<br>o113 | 1.780180E-05 | 4.271168E-25 | 1.780180E-05  | 1.000 |
| 988  | conc<br>o114 | 0.00000      | 6.314578E-23 | -6.314578E-23 | 1.000 |
| 989  | conc<br>o115 | 1.385330E-04 | 7.373218E-21 | 1.385330E-04  | 1.000 |
| 990  | conc<br>o116 | 9.811610E-04 | 6.841230E-19 | 9.811610E-04  | 1.000 |
| 991  | conc<br>o117 | 0.00000      | 5.073846E-17 | -5.073846E-17 | 1.000 |
| 992  | conc<br>o118 | 0.00000      | 3.025131E-15 | -3.025131E-15 | 1.000 |
| 993  | conc<br>o119 | 9.139440E-03 | 1.457985E-13 | 9.139440E-03  | 1.000 |
| 994  | conc<br>o120 | 6.972520E-03 | 5.710664E-12 | 6.972520E-03  | 1.000 |
| 995  | conc<br>o121 | 0.00000      | 1.827237E-10 | -1.827237E-10 | 1.000 |
| 996  | conc<br>o122 | 0.166320     | 4.800216E-09 | 0.166320      | 1.000 |
| 997  | conc<br>o123 | 0.00000      | 1.040404E-07 | -1.040404E-07 | 1.000 |
| 998  | conc<br>o124 | 0.00000      | 1.869291E-06 | -1.869291E-06 | 1.000 |
| 999  | conc<br>o125 | 0.776139     | 2.796963E-05 | 0.776111      | 1.000 |
| 1000 | conc<br>o126 | 2.73776      | 3.500918E-04 | 2.73741       | 1.000 |
| 1001 | conc<br>o127 | 0.00000      | 3.681848E-03 | -3.681848E-03 | 1.000 |
| 1002 | conc<br>o128 | 0.00000      | 3.267388E-02 | -3.267388E-02 | 1.000 |
| 1003 | conc<br>o129 | 31.3458      | 0.245705     | 31.1001       | 1.000 |
| 1004 | conc<br>o130 | 8.75085      | 1.57220      | 7.17865       | 1.000 |
| 1005 | conc<br>o131 | 0.00000      | 8.59533      | -8.59533      | 1.000 |
| 1006 | conc<br>o132 | 86.1408      | 40.3144      | 45.8264       | 1.000 |
| 1007 | conc<br>o133 | 963.476      | 162.888      | 800.588       | 1.000 |
| 1008 | conc<br>o134 | 1747.51      | 569.344      | 1178.17       | 1.000 |
| 1009 | conc<br>o135 | 3591.21      | 1729.02      | 1862.19       | 1.000 |
| 1010 | conc<br>o136 | 9918.59      | 4583.00      | 5335.59       | 1.000 |
| 1011 | conc<br>o137 | 15848.6      | 10655.4      | 5193.20       | 1.000 |
| 1012 | conc<br>o138 | 15510.6      | 21849.1      | -6338.54      | 1.000 |
| 1013 | conc<br>o139 | 40579.2      | 39760.4      | 818.777       | 1.000 |
| 1014 | conc<br>o140 | 107955.      | 64683.6      | 43271.4       | 1.000 |
| 1015 | conc<br>o141 | 130437.      | 94899.5      | 35537.5       | 1.000 |
| 1016 | conc<br>o142 | 87393.5      | 126898.      | -39504.6      | 1.000 |
| 1017 | conc<br>o143 | 113899.      | 156630.      | -42731.4      | 1.000 |
| 1018 | conc<br>o144 | 212482.      | 181097.      | 31384.9       | 1.000 |
| 1019 | conc<br>o145 | 250810.      | 199296.      | 51513.7       | 1.000 |
| 1020 | conc<br>o146 | 238335.      | 212057.      | 26277.8       | 1.000 |
| 1021 | conc<br>o147 | 246662.      | 221096.      | 25566.5       | 1.000 |
|      | conc         |              |              |               |       |



|      |              |         |         |          |       |
|------|--------------|---------|---------|----------|-------|
| 1022 | o148<br>conc | 253421. | 228026. | 25395.4  | 1.000 |
| 1023 | o149<br>conc | 228386. | 233845. | -5458.91 | 1.000 |
| 1024 | o150<br>conc | 189898. | 238929. | -49031.5 | 1.000 |
| 1025 | o151<br>conc | 171060. | 243285. | -72225.3 | 1.000 |
| 1026 | o152<br>conc | 209249. | 246799. | -37550.3 | 1.000 |
| 1027 | o153<br>conc | 263462. | 249380. | 14082.2  | 1.000 |
| 1028 | o154<br>conc | 253026. | 250996. | 2030.04  | 1.000 |
| 1029 | o155<br>conc | 213009. | 251668. | -38658.8 | 1.000 |
| 1030 | o156<br>conc | 206588. | 251445. | -44857.2 | 1.000 |
| 1031 | o157<br>conc | 237117. | 250392. | -13274.6 | 1.000 |
| 1032 | o158<br>conc | 281729. | 248575. | 33154.0  | 1.000 |
| 1033 | o159<br>conc | 295557. | 246064. | 49493.0  | 1.000 |
| 1034 | o160<br>conc | 280600. | 242926. | 37673.9  | 1.000 |
| 1035 | o161<br>conc | 280690. | 239226. | 41463.7  | 1.000 |
| 1036 | o162<br>conc | 292713. | 235028. | 57685.3  | 1.000 |
| 1037 | o163<br>conc | 292851. | 230390. | 62460.9  | 1.000 |
| 1038 | o164<br>conc | 279875. | 225371. | 54504.2  | 1.000 |
| 1039 | o165<br>conc | 258901. | 220024. | 38877.4  | 1.000 |
| 1040 | o166<br>conc | 235046. | 214400. | 20646.4  | 1.000 |
| 1041 | o167<br>conc | 213428. | 208546. | 4881.77  | 1.000 |
| 1042 | o168<br>conc | 199164. | 202508. | -3344.04 | 1.000 |
| 1043 | o169<br>conc | 197371. | 196326. | 1044.77  | 1.000 |
| 1044 | o170<br>conc | 203306. | 190039. | 13267.1  | 1.000 |
| 1045 | o171<br>conc | 170565. | 183681. | -13116.1 | 1.000 |
| 1046 | o172<br>conc | 94276.1 | 177285. | -83008.8 | 1.000 |
| 1047 | o173<br>conc | 82388.0 | 170879. | -88491.4 | 1.000 |
| 1048 | o174<br>conc | 144291. | 164491. | -20200.1 | 1.000 |
| 1049 | o175<br>conc | 161528. | 158144. | 3384.35  | 1.000 |
| 1050 | o176<br>conc | 128019. | 151858. | -23839.4 | 1.000 |
| 1051 | o177<br>conc | 108437. | 145654. | -37217.3 | 1.000 |
| 1052 | o178<br>conc | 110262. | 139548. | -29286.0 | 1.000 |
| 1053 | o179<br>conc | 121310. | 133554. | -12244.2 | 1.000 |
| 1054 | o180<br>conc | 133760. | 127685. | 6074.57  | 1.000 |
| 1055 | o181<br>conc | 139392. | 121953. | 17439.2  | 1.000 |
| 1056 | o182<br>conc | 129247. | 116366. | 12881.4  | 1.000 |
| 1057 | o183<br>conc | 116109. | 110932. | 5177.12  | 1.000 |
| 1058 | o184         | 126217. | 105658. | 20558.7  | 1.000 |

|      |              |         |         |          |       |
|------|--------------|---------|---------|----------|-------|
| 1059 | conc<br>o185 | 139498. | 100550. | 38947.5  | 1.000 |
| 1060 | conc<br>o186 | 126431. | 95613.4 | 30817.6  | 1.000 |
| 1061 | conc<br>o187 | 110561. | 90851.3 | 19709.7  | 1.000 |
| 1062 | conc<br>o188 | 110899. | 86268.3 | 24630.7  | 1.000 |
| 1063 | conc<br>o189 | 109252. | 81868.0 | 27384.0  | 1.000 |
| 1064 | conc<br>o190 | 99126.8 | 77654.8 | 21472.0  | 1.000 |
| 1065 | conc<br>o191 | 92048.0 | 73633.4 | 18414.6  | 1.000 |
| 1066 | conc<br>o192 | 89688.8 | 69809.3 | 19879.5  | 1.000 |
| 1067 | conc<br>o193 | 88557.5 | 66189.3 | 22368.2  | 1.000 |
| 1068 | conc<br>o194 | 94958.0 | 62781.8 | 32176.2  | 1.000 |
| 1069 | conc<br>o195 | 107079. | 59597.0 | 47482.0  | 1.000 |
| 1070 | conc<br>o196 | 91369.6 | 56647.1 | 34722.5  | 1.000 |
| 1071 | conc<br>o197 | 46576.9 | 53946.5 | -7369.56 | 1.000 |
| 1072 | conc<br>o198 | 25748.9 | 51511.9 | -25763.0 | 1.000 |
| 1073 | conc<br>o199 | 33799.4 | 49362.4 | -15563.0 | 1.000 |
| 1074 | conc<br>o200 | 35631.0 | 47519.0 | -11888.0 | 1.000 |
| 1075 | conc<br>o201 | 28383.7 | 46004.2 | -17620.5 | 1.000 |
| 1076 | conc<br>o202 | 23252.8 | 44841.7 | -21588.9 | 1.000 |
| 1077 | conc<br>o203 | 26145.9 | 44055.3 | -17909.4 | 1.000 |
| 1078 | conc<br>o204 | 36201.1 | 43668.2 | -7467.12 | 1.000 |
| 1079 | conc<br>o205 | 41993.2 | 43701.6 | -1708.43 | 1.000 |
| 1080 | conc<br>o206 | 42503.4 | 44173.6 | -1670.19 | 1.000 |
| 1081 | conc<br>o207 | 49159.4 | 45097.5 | 4061.86  | 1.000 |
| 1082 | conc<br>o208 | 59113.1 | 46480.9 | 12632.2  | 1.000 |
| 1083 | conc<br>o209 | 53550.1 | 48323.7 | 5226.42  | 1.000 |
| 1084 | conc<br>o210 | 42313.1 | 50617.2 | -8304.11 | 1.000 |
| 1085 | conc<br>o211 | 49127.3 | 53343.1 | -4215.77 | 1.000 |
| 1086 | conc<br>o212 | 59932.4 | 56472.3 | 3460.11  | 1.000 |
| 1087 | conc<br>o213 | 57765.5 | 59964.9 | -2199.44 | 1.000 |
| 1088 | conc<br>o214 | 59051.1 | 63770.1 | -4718.98 | 1.000 |
| 1089 | conc<br>o215 | 71289.7 | 67826.2 | 3463.47  | 1.000 |
| 1090 | conc<br>o216 | 78099.1 | 72062.3 | 6036.84  | 1.000 |
| 1091 | conc<br>o217 | 74866.7 | 76398.8 | -1532.08 | 1.000 |
| 1092 | conc<br>o218 | 69517.8 | 80749.9 | -11232.1 | 1.000 |
| 1093 | conc<br>o219 | 70436.8 | 85025.6 | -14588.8 | 1.000 |
| 1094 | conc<br>o220 | 82025.2 | 89133.7 | -7108.51 | 1.000 |
|      | conc         |         |         |          |       |

|      |              |         |         |          |       |
|------|--------------|---------|---------|----------|-------|
| 1095 | o221<br>conc | 92322.6 | 92983.2 | -660.646 | 1.000 |
| 1096 | o222<br>conc | 93098.2 | 96486.6 | -3388.37 | 1.000 |
| 1097 | o223<br>conc | 93041.5 | 99562.3 | -6520.77 | 1.000 |
| 1098 | o224<br>conc | 100680. | 102138. | -1457.67 | 1.000 |
| 1099 | o225<br>conc | 120120. | 104151. | 15969.1  | 1.000 |
| 1100 | o226<br>conc | 135730. | 105553. | 30177.0  | 1.000 |
| 1101 | o227<br>conc | 127404. | 106309. | 21095.2  | 1.000 |
| 1102 | o228<br>conc | 121217. | 106398. | 14818.8  | 1.000 |
| 1103 | o229<br>conc | 136763. | 105816. | 30946.6  | 1.000 |
| 1104 | o230<br>conc | 129342. | 104573. | 24768.6  | 1.000 |
| 1105 | o231<br>conc | 88468.1 | 102694. | -14225.4 | 1.000 |
| 1106 | o232<br>conc | 70850.2 | 100214. | -29364.0 | 1.000 |
| 1107 | o233<br>conc | 80996.3 | 97184.2 | -16187.9 | 1.000 |
| 1108 | o234<br>conc | 79578.4 | 93661.8 | -14083.4 | 1.000 |
| 1109 | o235<br>conc | 71476.0 | 89712.8 | -18236.8 | 1.000 |
| 1110 | o236<br>conc | 74543.8 | 85408.2 | -10864.4 | 1.000 |
| 1111 | o237<br>conc | 73858.3 | 80821.7 | -6963.44 | 1.000 |
| 1112 | o238<br>conc | 60598.7 | 76028.3 | -15429.6 | 1.000 |
| 1113 | o239<br>conc | 54071.0 | 71101.3 | -17030.3 | 1.000 |
| 1114 | o240<br>conc | 58191.7 | 66111.2 | -7919.53 | 1.000 |
| 1115 | o241<br>conc | 57334.7 | 61124.0 | -3789.34 | 1.000 |
| 1116 | o242<br>conc | 52277.3 | 56199.9 | -3922.55 | 1.000 |
| 1117 | o243<br>conc | 52213.6 | 51392.1 | 821.543  | 1.000 |
| 1118 | o244<br>conc | 53457.5 | 46746.7 | 6710.81  | 1.000 |
| 1119 | o245<br>conc | 51425.7 | 42302.1 | 9123.59  | 1.000 |
| 1120 | o246<br>conc | 50764.7 | 38089.0 | 12675.7  | 1.000 |
| 1121 | o247<br>conc | 52332.4 | 34130.3 | 18202.1  | 1.000 |
| 1122 | o248<br>conc | 49494.8 | 30442.1 | 19052.7  | 1.000 |
| 1123 | o249<br>conc | 41204.9 | 27033.6 | 14171.3  | 1.000 |
| 1124 | o250<br>conc | 31483.7 | 23908.4 | 7575.33  | 1.000 |
| 1125 | o251<br>conc | 24486.3 | 21064.6 | 3421.69  | 1.000 |
| 1126 | o252<br>conc | 21590.2 | 18496.2 | 3093.97  | 1.000 |
| 1127 | o253<br>conc | 18193.9 | 16193.6 | 2000.32  | 1.000 |
| 1128 | o254<br>conc | 13790.9 | 14144.2 | -353.305 | 1.000 |
| 1129 | o255<br>conc | 13243.4 | 12333.6 | 909.761  | 1.000 |
| 1130 | o256<br>conc | 14937.6 | 10746.0 | 4191.56  | 1.000 |
| 1131 | o257         | 13632.5 | 9364.79 | 4267.71  | 1.000 |

|      |              |         |         |          |       |
|------|--------------|---------|---------|----------|-------|
| 1132 | conc<br>o258 | 9520.91 | 8173.04 | 1347.87  | 1.000 |
| 1133 | conc<br>o259 | 5061.07 | 7154.14 | -2093.07 | 1.000 |
| 1134 | conc<br>o260 | 3493.82 | 6291.94 | -2798.12 | 1.000 |
| 1135 | conc<br>o261 | 5447.37 | 5571.14 | -123.769 | 1.000 |
| 1136 | conc<br>o262 | 7290.70 | 4977.40 | 2313.30  | 1.000 |
| 1137 | conc<br>o263 | 7251.73 | 4497.52 | 2754.21  | 1.000 |
| 1138 | conc<br>o264 | 5666.69 | 4119.46 | 1547.23  | 1.000 |
| 1139 | conc<br>o265 | 4002.47 | 3832.40 | 170.074  | 1.000 |
| 1140 | conc<br>o266 | 3705.62 | 3626.64 | 78.9758  | 1.000 |
| 1141 | conc<br>o267 | 4079.18 | 3493.62 | 585.560  | 1.000 |
| 1142 | conc<br>o268 | 4342.79 | 3425.74 | 917.050  | 1.000 |
| 1143 | conc<br>o269 | 4657.45 | 3416.31 | 1241.14  | 1.000 |
| 1144 | conc<br>o270 | 4709.12 | 3459.41 | 1249.71  | 1.000 |
| 1145 | conc<br>o271 | 3662.07 | 3549.75 | 112.317  | 1.000 |
| 1146 | conc<br>o272 | 2533.16 | 3682.59 | -1149.43 | 1.000 |
| 1147 | conc<br>o273 | 2971.71 | 3853.54 | -881.827 | 1.000 |
| 1148 | conc<br>o274 | 3480.80 | 4058.53 | -577.727 | 1.000 |
| 1149 | conc<br>o275 | 2837.98 | 4293.65 | -1455.67 | 1.000 |
| 1150 | conc<br>o276 | 3585.37 | 4555.12 | -969.747 | 1.000 |
| 1151 | conc<br>o277 | 5772.33 | 4839.13 | 933.195  | 1.000 |
| 1152 | conc<br>o278 | 5009.78 | 5141.90 | -132.117 | 1.000 |
| 1153 | conc<br>o279 | 2281.37 | 5459.53 | -3178.16 | 1.000 |
| 1154 | conc<br>o280 | 2563.73 | 5788.06 | -3224.33 | 1.000 |
| 1155 | conc<br>o281 | 4521.34 | 6123.45 | -1602.11 | 1.000 |
| 1156 | conc<br>o282 | 4986.85 | 6461.54 | -1474.69 | 1.000 |
| 1157 | conc<br>o283 | 5110.52 | 6798.16 | -1687.64 | 1.000 |
| 1158 | conc<br>o284 | 6018.91 | 7129.10 | -1110.19 | 1.000 |
| 1159 | conc<br>o285 | 6769.64 | 7450.19 | -680.553 | 1.000 |
| 1160 | conc<br>o286 | 7514.82 | 7757.34 | -242.524 | 1.000 |
| 1161 | conc<br>o287 | 9606.69 | 8046.62 | 1560.07  | 1.000 |
| 1162 | conc<br>o288 | 11461.7 | 8314.29 | 3147.41  | 1.000 |
| 1163 | conc<br>o289 | 10743.1 | 8556.91 | 2186.19  | 1.000 |
| 1164 | conc<br>o290 | 10720.9 | 8771.33 | 1949.57  | 1.000 |
| 1165 | conc<br>o291 | 13733.1 | 8954.84 | 4778.26  | 1.000 |
| 1166 | conc<br>o292 | 14813.8 | 9105.11 | 5708.69  | 1.000 |
| 1167 | conc<br>o293 | 11710.4 | 9220.33 | 2490.07  | 1.000 |
|      | conc         |         |         |          |       |

|      |              |         |         |          |       |
|------|--------------|---------|---------|----------|-------|
| 1168 | o294<br>conc | 7841.36 | 9299.16 | -1457.80 | 1.000 |
| 1169 | o295<br>conc | 6105.19 | 9340.79 | -3235.60 | 1.000 |
| 1170 | o296<br>conc | 6112.11 | 9344.95 | -3232.84 | 1.000 |
| 1171 | o297<br>conc | 6769.24 | 9311.87 | -2542.63 | 1.000 |
| 1172 | o298<br>conc | 7018.63 | 9242.30 | -2223.67 | 1.000 |
| 1173 | o299<br>conc | 6603.01 | 9137.47 | -2534.46 | 1.000 |
| 1174 | o300<br>conc | 6064.89 | 8999.04 | -2934.15 | 1.000 |
| 1175 | o301<br>conc | 5981.44 | 8829.10 | -2847.66 | 1.000 |
| 1176 | o302<br>conc | 6769.91 | 8630.06 | -1860.15 | 1.000 |
| 1177 | o303<br>conc | 8101.42 | 8404.63 | -303.209 | 1.000 |
| 1178 | o304<br>conc | 9429.78 | 8155.74 | 1274.04  | 1.000 |
| 1179 | o305<br>conc | 10216.6 | 7886.52 | 2330.08  | 1.000 |
| 1180 | o306<br>conc | 10232.1 | 7600.16 | 2631.94  | 1.000 |
| 1181 | o307<br>conc | 9650.45 | 7299.94 | 2350.51  | 1.000 |
| 1182 | o308<br>conc | 8673.18 | 6989.11 | 1684.07  | 1.000 |
| 1183 | o309<br>conc | 7502.49 | 6670.86 | 831.634  | 1.000 |
| 1184 | o310<br>conc | 6345.57 | 6348.24 | -2.67393 | 1.000 |
| 1185 | o311<br>conc | 5411.55 | 6024.19 | -612.644 | 1.000 |
| 1186 | o312<br>conc | 4907.69 | 5701.43 | -793.739 | 1.000 |
| 1187 | o313<br>conc | 4888.55 | 5382.45 | -493.902 | 1.000 |
| 1188 | o314<br>conc | 5145.72 | 5069.52 | 76.2003  | 1.000 |
| 1189 | o315<br>conc | 5444.77 | 4764.63 | 680.138  | 1.000 |
| 1190 | o316<br>conc | 5566.72 | 4469.52 | 1097.20  | 1.000 |
| 1191 | o317<br>conc | 5430.42 | 4185.64 | 1244.78  | 1.000 |
| 1192 | o318<br>conc | 5027.17 | 3914.19 | 1112.98  | 1.000 |
| 1193 | o319<br>conc | 4349.18 | 3656.10 | 693.077  | 1.000 |
| 1194 | o320<br>conc | 3446.13 | 3412.06 | 34.0730  | 1.000 |
| 1195 | o321<br>conc | 2499.34 | 3182.51 | -683.166 | 1.000 |
| 1196 | o322<br>conc | 1708.47 | 2967.69 | -1259.22 | 1.000 |
| 1197 | o323<br>conc | 1259.21 | 2767.65 | -1508.44 | 1.000 |
| 1198 | o324<br>conc | 1157.75 | 2582.25 | -1424.50 | 1.000 |
| 1199 | o325<br>conc | 1285.64 | 2411.23 | -1125.59 | 1.000 |
| 1200 | o326<br>conc | 1521.98 | 2254.17 | -732.193 | 1.000 |
| 1201 | o327<br>conc | 1760.85 | 2110.57 | -349.716 | 1.000 |
| 1202 | o328<br>conc | 1942.61 | 1979.81 | -37.2040 | 1.000 |
| 1203 | o329<br>conc | 2016.51 | 1861.25 | 155.256  | 1.000 |
| 1204 | o330         | 1934.51 | 1754.18 | 180.332  | 1.000 |

|      |              |         |         |          |       |
|------|--------------|---------|---------|----------|-------|
| 1205 | conc<br>o331 | 1702.19 | 1657.85 | 44.3446  | 1.000 |
| 1206 | conc<br>o332 | 1373.90 | 1571.50 | -197.602 | 1.000 |
| 1207 | conc<br>o333 | 1005.74 | 1494.39 | -488.651 | 1.000 |
| 1208 | conc<br>o334 | 649.533 | 1425.76 | -776.230 | 1.000 |
| 1209 | conc<br>o335 | 339.055 | 1364.89 | -1025.83 | 1.000 |
| 1210 | conc<br>o336 | 103.355 | 1311.06 | -1207.70 | 1.000 |
| 1211 | conc<br>o337 | 0.00000 | 1263.60 | -1263.60 | 1.000 |
| 1212 | conc<br>o338 | 0.00000 | 1221.89 | -1221.89 | 1.000 |
| 1213 | conc<br>o339 | 0.00000 | 1185.31 | -1185.31 | 1.000 |
| 1214 | conc<br>o340 | 0.00000 | 1153.31 | -1153.31 | 1.000 |
| 1215 | conc<br>o341 | 0.00000 | 1125.37 | -1125.37 | 1.000 |
| 1216 | conc<br>o342 | 0.00000 | 1101.03 | -1101.03 | 1.000 |
| 1217 | conc<br>o343 | 0.00000 | 1079.85 | -1079.85 | 1.000 |
| 1218 | conc<br>o344 | 24.6039 | 1061.44 | -1036.83 | 1.000 |
| 1219 | conc<br>o345 | 189.070 | 1045.44 | -856.374 | 1.000 |
| 1220 | conc<br>o346 | 371.669 | 1031.55 | -659.883 | 1.000 |
| 1221 | conc<br>o347 | 489.454 | 1019.48 | -530.024 | 1.000 |
| 1222 | conc<br>o348 | 467.298 | 1008.97 | -541.676 | 1.000 |
| 1223 | conc<br>o349 | 323.288 | 999.819 | -676.531 | 1.000 |
| 1224 | conc<br>o350 | 136.783 | 991.819 | -855.036 | 1.000 |
| 1225 | conc<br>o351 | 0.00000 | 984.804 | -984.804 | 1.000 |
| 1226 | conc<br>o352 | 0.00000 | 978.628 | -978.628 | 1.000 |
| 1227 | conc<br>o353 | 0.00000 | 973.162 | -973.162 | 1.000 |
| 1228 | conc<br>o354 | 0.00000 | 968.296 | -968.296 | 1.000 |
| 1229 | conc<br>o355 | 15.9872 | 963.936 | -947.949 | 1.000 |
| 1230 | conc<br>o356 | 27.6263 | 960.000 | -932.374 | 1.000 |
| 1231 | conc<br>o357 | 20.8621 | 956.419 | -935.557 | 1.000 |
| 1232 | conc<br>o358 | 0.00000 | 953.135 | -953.135 | 1.000 |
| 1233 | conc<br>o359 | 0.00000 | 950.098 | -950.098 | 1.000 |
| 1234 | conc<br>o360 | 0.00000 | 947.266 | -947.266 | 1.000 |
| 1235 | conc<br>o361 | 0.00000 | 944.604 | -944.604 | 1.000 |
| 1236 | conc<br>o362 | 38.6360 | 942.083 | -903.447 | 1.000 |
| 1237 | conc<br>o363 | 161.098 | 939.677 | -778.579 | 1.000 |
| 1238 | conc<br>o364 | 316.812 | 937.367 | -620.555 | 1.000 |
| 1239 | conc<br>o365 | 483.800 | 935.136 | -451.336 | 1.000 |
| 1240 | conc<br>o366 | 642.739 | 932.969 | -290.230 | 1.000 |
|      | conc         |         |         |          |       |

|      |              |         |         |          |       |
|------|--------------|---------|---------|----------|-------|
| 1241 | o367<br>conc | 788.596 | 930.856 | -142.260 | 1.000 |
| 1242 | o368<br>conc | 921.125 | 928.787 | -7.66157 | 1.000 |
| 1243 | o369<br>conc | 1039.77 | 926.753 | 113.017  | 1.000 |
| 1244 | o370<br>conc | 1127.28 | 924.750 | 202.530  | 1.000 |
| 1245 | o371<br>conc | 1141.63 | 922.771 | 218.859  | 1.000 |
| 1246 | o372<br>conc | 1038.82 | 920.813 | 118.007  | 1.000 |
| 1247 | o373<br>conc | 787.834 | 918.872 | -131.038 | 1.000 |
| 1248 | o374<br>conc | 454.309 | 916.946 | -462.637 | 1.000 |
| 1249 | o375<br>conc | 147.371 | 915.032 | -767.661 | 1.000 |
| 1250 | o376<br>conc | 0.00000 | 913.129 | -913.129 | 1.000 |
| 1251 | o377<br>conc | 0.00000 | 911.235 | -911.235 | 1.000 |
| 1252 | o378<br>conc | 178.614 | 909.350 | -730.736 | 1.000 |
| 1253 | o379<br>conc | 464.396 | 907.471 | -443.075 | 1.000 |
| 1254 | o380<br>conc | 806.740 | 905.599 | -98.8592 | 1.000 |
| 1255 | o381<br>conc | 1155.84 | 903.733 | 252.107  | 1.000 |
| 1256 | o382<br>conc | 1461.89 | 901.873 | 560.017  | 1.000 |
| 1257 | o383<br>conc | 1676.50 | 900.018 | 776.482  | 1.000 |
| 1258 | o384<br>conc | 1760.11 | 898.167 | 861.943  | 1.000 |
| 1259 | o385<br>conc | 1676.55 | 896.322 | 780.228  | 1.000 |
| 1260 | o386<br>conc | 1390.50 | 894.480 | 496.020  | 1.000 |
| 1261 | o387<br>conc | 931.442 | 892.644 | 38.7983  | 1.000 |
| 1262 | o388<br>conc | 437.972 | 890.811 | -452.839 | 1.000 |
| 1263 | o389<br>conc | 59.1618 | 888.983 | -829.821 | 1.000 |
| 1264 | o390<br>conc | 0.00000 | 887.159 | -887.159 | 1.000 |
| 1265 | o391<br>conc | 26.7570 | 885.339 | -858.582 | 1.000 |
| 1266 | o392<br>conc | 267.289 | 883.523 | -616.234 | 1.000 |
| 1267 | o393<br>conc | 557.398 | 881.710 | -324.312 | 1.000 |
| 1268 | o394<br>conc | 817.031 | 879.902 | -62.8713 | 1.000 |
| 1269 | o395<br>conc | 991.351 | 878.098 | 113.253  | 1.000 |
| 1270 | o396<br>conc | 1028.94 | 876.298 | 152.642  | 1.000 |
| 1271 | o397<br>conc | 885.073 | 874.501 | 10.5719  | 1.000 |
| 1272 | o398<br>conc | 598.276 | 872.708 | -274.432 | 1.000 |
| 1273 | o399<br>conc | 263.623 | 870.920 | -607.297 | 1.000 |
| 1274 | o400<br>conc | 0.00000 | 869.135 | -869.135 | 1.000 |
| 1275 | o401<br>conc | 0.00000 | 867.353 | -867.353 | 1.000 |
| 1276 | o402<br>conc | 0.00000 | 865.576 | -865.576 | 1.000 |
| 1277 | o403         | 0.00000 | 863.803 | -863.803 | 1.000 |

|      |              |         |         |           |       |
|------|--------------|---------|---------|-----------|-------|
| 1278 | conc<br>o404 | 152.637 | 862.033 | -709.396  | 1.000 |
| 1279 | conc<br>o405 | 486.728 | 860.267 | -373.539  | 1.000 |
| 1280 | conc<br>o406 | 803.196 | 858.504 | -55.3085  | 1.000 |
| 1281 | conc<br>o407 | 999.271 | 856.746 | 142.525   | 1.000 |
| 1282 | conc<br>o408 | 1001.11 | 854.991 | 146.119   | 1.000 |
| 1283 | conc<br>o409 | 853.094 | 853.240 | -0.146196 | 1.000 |
| 1284 | conc<br>o410 | 629.831 | 851.493 | -221.662  | 1.000 |
| 1285 | conc<br>o411 | 404.922 | 849.749 | -444.827  | 1.000 |
| 1286 | conc<br>o412 | 221.358 | 848.009 | -626.651  | 1.000 |
| 1287 | conc<br>o413 | 86.4305 | 846.273 | -759.843  | 1.000 |
| 1288 | conc<br>o414 | 5.41412 | 844.541 | -839.127  | 1.000 |
| 1289 | conc<br>o415 | 0.00000 | 842.812 | -842.812  | 1.000 |
| 1290 | conc<br>o416 | 0.00000 | 841.087 | -841.087  | 1.000 |
| 1291 | conc<br>o417 | 1.83637 | 839.365 | -837.529  | 1.000 |
| 1292 | conc<br>o418 | 0.00000 | 837.648 | -837.648  | 1.000 |
| 1293 | conc<br>o419 | 20.0022 | 835.934 | -815.931  | 1.000 |
| 1294 | conc<br>o420 | 167.357 | 834.223 | -666.866  | 1.000 |
| 1295 | conc<br>o421 | 356.022 | 832.516 | -476.494  | 1.000 |
| 1296 | conc<br>o422 | 487.104 | 830.813 | -343.709  | 1.000 |
| 1297 | conc<br>o423 | 472.761 | 829.113 | -356.352  | 1.000 |
| 1298 | conc<br>o424 | 331.322 | 827.417 | -496.095  | 1.000 |
| 1299 | conc<br>o425 | 140.303 | 825.725 | -685.422  | 1.000 |
| 1300 | conc<br>o426 | 0.00000 | 824.036 | -824.036  | 1.000 |
| 1301 | conc<br>o427 | 0.00000 | 822.351 | -822.351  | 1.000 |
| 1302 | conc<br>o428 | 0.00000 | 820.669 | -820.669  | 1.000 |
| 1303 | conc<br>o429 | 0.00000 | 818.991 | -818.991  | 1.000 |
| 1304 | conc<br>o430 | 77.2770 | 817.317 | -740.040  | 1.000 |
| 1305 | conc<br>o431 | 224.980 | 815.646 | -590.666  | 1.000 |
| 1306 | conc<br>o432 | 377.267 | 813.978 | -436.711  | 1.000 |
| 1307 | conc<br>o433 | 507.381 | 812.315 | -304.934  | 1.000 |
| 1308 | conc<br>o434 | 591.128 | 810.654 | -219.526  | 1.000 |
| 1309 | conc<br>o435 | 612.737 | 808.998 | -196.261  | 1.000 |
| 1310 | conc<br>o436 | 558.166 | 807.344 | -249.178  | 1.000 |
| 1311 | conc<br>o437 | 415.570 | 805.695 | -390.125  | 1.000 |
| 1312 | conc<br>o438 | 220.447 | 804.048 | -583.601  | 1.000 |
| 1313 | conc<br>o439 | 53.8837 | 802.406 | -748.522  | 1.000 |
|      | conc         |         |         |           |       |



|      |              |         |         |          |       |
|------|--------------|---------|---------|----------|-------|
| 1314 | o440         | 0.00000 | 800.766 | -800.766 | 1.000 |
| 1315 | conc<br>o441 | 108.455 | 799.131 | -690.676 | 1.000 |
| 1316 | conc<br>o442 | 303.139 | 797.498 | -494.359 | 1.000 |
| 1317 | conc<br>o443 | 466.067 | 795.869 | -329.802 | 1.000 |
| 1318 | conc<br>o444 | 483.141 | 794.244 | -311.103 | 1.000 |
| 1319 | conc<br>o445 | 338.699 | 792.622 | -453.923 | 1.000 |
| 1320 | conc<br>o446 | 141.219 | 791.004 | -649.785 | 1.000 |
| 1321 | conc<br>o447 | 7.10519 | 789.389 | -782.283 | 1.000 |
| 1322 | conc<br>o448 | 31.8670 | 787.777 | -755.910 | 1.000 |
| 1323 | conc<br>o449 | 183.043 | 786.169 | -603.126 | 1.000 |
| 1324 | conc<br>o450 | 379.758 | 784.564 | -404.806 | 1.000 |
| 1325 | conc<br>o451 | 541.471 | 782.963 | -241.492 | 1.000 |
| 1326 | conc<br>o452 | 618.586 | 781.365 | -162.779 | 1.000 |
| 1327 | conc<br>o453 | 612.838 | 779.770 | -166.932 | 1.000 |
| 1328 | conc<br>o454 | 530.791 | 778.179 | -247.388 | 1.000 |
| 1329 | conc<br>o455 | 382.484 | 776.591 | -394.107 | 1.000 |
| 1330 | conc<br>o456 | 207.541 | 775.007 | -567.466 | 1.000 |
| 1331 | conc<br>o457 | 60.5508 | 773.426 | -712.875 | 1.000 |
| 1332 | conc<br>o458 | 0.00000 | 771.848 | -771.848 | 1.000 |
| 1333 | conc<br>o459 | 46.1642 | 770.274 | -724.109 | 1.000 |
| 1334 | conc<br>o460 | 192.871 | 768.703 | -575.832 | 1.000 |
| 1335 | conc<br>o461 | 411.737 | 767.135 | -355.398 | 1.000 |
| 1336 | conc<br>o462 | 675.194 | 765.571 | -90.3766 | 1.000 |
| 1337 | conc<br>o463 | 918.134 | 764.010 | 154.124  | 1.000 |
| 1338 | conc<br>o464 | 1050.34 | 762.452 | 287.888  | 1.000 |
| 1339 | conc<br>o465 | 981.197 | 760.897 | 220.300  | 1.000 |
| 1340 | conc<br>o466 | 681.595 | 759.346 | -77.7513 | 1.000 |
| 1341 | conc<br>o467 | 304.360 | 757.798 | -453.438 | 1.000 |
| 1342 | conc<br>o468 | 35.7788 | 756.254 | -720.475 | 1.000 |
| 1343 | conc<br>o469 | 51.8214 | 754.713 | -702.891 | 1.000 |
| 1344 | conc<br>o470 | 338.819 | 753.175 | -414.356 | 1.000 |
| 1345 | conc<br>o471 | 716.697 | 751.640 | -34.9430 | 1.000 |
| 1346 | conc<br>o472 | 999.732 | 750.109 | 249.623  | 1.000 |
| 1347 | conc<br>o473 | 1047.59 | 748.580 | 299.010  | 1.000 |
| 1348 | conc<br>o474 | 902.303 | 747.055 | 155.248  | 1.000 |
| 1349 | conc<br>o475 | 651.723 | 745.534 | -93.8107 | 1.000 |
| 1350 | conc<br>o476 | 382.911 | 744.015 | -361.104 | 1.000 |

|      |              |         |         |          |       |
|------|--------------|---------|---------|----------|-------|
| 1351 | conc<br>o477 | 159.502 | 742.500 | -582.998 | 1.000 |
| 1352 | conc<br>o478 | 18.2148 | 740.988 | -722.773 | 1.000 |
| 1353 | conc<br>o479 | 0.00000 | 739.479 | -739.479 | 1.000 |
| 1354 | conc<br>o480 | 107.393 | 737.973 | -630.580 | 1.000 |
| 1355 | conc<br>o481 | 291.838 | 736.471 | -444.633 | 1.000 |
| 1356 | conc<br>o482 | 452.788 | 734.972 | -282.184 | 1.000 |
| 1357 | conc<br>o483 | 496.542 | 733.476 | -236.934 | 1.000 |
| 1358 | conc<br>o484 | 393.985 | 731.983 | -337.998 | 1.000 |
| 1359 | conc<br>o485 | 213.383 | 730.493 | -517.110 | 1.000 |
| 1360 | conc<br>o486 | 31.0702 | 729.007 | -697.936 | 1.000 |
| 1361 | conc<br>o487 | 0.00000 | 727.523 | -727.523 | 1.000 |
| 1362 | conc<br>o488 | 0.00000 | 726.043 | -726.043 | 1.000 |
| 1363 | conc<br>o489 | 0.00000 | 724.566 | -724.566 | 1.000 |
| 1364 | conc<br>o490 | 30.4946 | 723.092 | -692.597 | 1.000 |
| 1365 | conc<br>o491 | 180.699 | 721.621 | -540.922 | 1.000 |
| 1366 | conc<br>o492 | 340.231 | 720.153 | -379.922 | 1.000 |
| 1367 | conc<br>o493 | 471.098 | 718.689 | -247.591 | 1.000 |
| 1368 | conc<br>o494 | 538.884 | 717.227 | -178.343 | 1.000 |
| 1369 | conc<br>o495 | 547.549 | 715.769 | -168.220 | 1.000 |
| 1370 | conc<br>o496 | 524.384 | 714.313 | -189.929 | 1.000 |
| 1371 | conc<br>o497 | 496.995 | 712.861 | -215.866 | 1.000 |
| 1372 | conc<br>o498 | 484.919 | 711.412 | -226.493 | 1.000 |
| 1373 | conc<br>o499 | 486.180 | 709.966 | -223.786 | 1.000 |
| 1374 | conc<br>o500 | 495.254 | 708.523 | -213.269 | 1.000 |

1375  
1376 See file mfit.res for more details of residuals in graph-ready format.  
1377

1378 See file mfit.seo for composite observation sensitivities.  
1379

1380  
1381 Objective function ----->  
1382

1383 Sum of squared weighted residuals (ie phi) = 8.4623E+10  
1384

1385  
1386 Correlation Coefficient ----->  
1387

1388 Correlation coefficient = 0.97756  
1389

1390  
1391 Analysis of residuals ----->  
1392

1393 All residuals:-  
1394 Number of residuals with non-zero weight = 500  
1395 Mean value of non-zero weighted residuals = 539.2  
1396 Maximum weighted residual [observation "o163"] = 6.2461E+04  
1397 Minimum weighted residual [observation "o173"] = -8.8491E+04  
1398 Standard variance of weighted residuals = 1.7341E+08

```
1399 Standard error of weighted residuals = 1.3168E+04
1400
1401 Note: the above variance was obtained by dividing the objective
1402 function by the number of system degrees of freedom (ie. number of
1403 observations with non-zero weight plus number of prior information
1404 articles with non-zero weight minus the number of adjustable parameters.)
1405 If the degrees of freedom is negative the divisor becomes
1406 the number of observations with non-zero weight plus the number of
1407 prior information items with non-zero weight.
1408
1409
1410 Covariance and other statistical matrices cannot be determined:-
1411 Memory conservation is operative so that covariance matrix is not calculated.
1412
1413
```
