# Supplementary material for: Comparing the Fate and Transport of MS2 Bacteriophage and Sodium Fluorescein in a Karstic Chalk Aquifer
Source: MDPI journal article supplement (doi:10.3390/pathogens13020168), 2024-02-13
Supplement: s1 [file s1]

# PEST RUN RECORD: CASE mfit

PEST Version: 16.1

PEST run mode:-

Parameter estimation mode

Case dimensions:-

|                                 |   |     |
|---------------------------------|---|-----|
| Number of parameters            | : | 4   |
| Number of adjustable parameters | : | 4   |
| Number of parameter groups      | : | 1   |
| Number of observations          | : | 500 |
| Number of prior estimates       | : | 0   |

Model command line(s):-

MDP\_2RNE

Jacobian command line:-

MDP\_2RNE /d  
Jacobian read from file Deriv.txt  
This is an ASCII file.

Model interface files:-

Templates:  
MFIT.tpl  
for model input files:  
Input.txt  
  
(Parameter values written using single precision protocol.)  
(Decimal point always included.)  
  
Instruction files:  
MFIT.ins  
for reading model output files:  
Output.txt

PEST-to-model message file:-

na

Singular value decomposition:-

|                                          |   |              |
|------------------------------------------|---|--------------|
| Perform SVD on $XtQX$ or $Q^{(1/2)}X$    | : | $Q^{(1/2)}X$ |
| Max. number of singular values to employ | : | 4            |
| Ratio of lowest/highest singular value   | : | 5.000000E-07 |
| Record eigenvectors in SVD file          | : | yes          |

Derivatives calculation:-

| Param group | Increment type | Increment  | Increment low bound | Forward or central switch | Multiplier (central) | Method (central) |
|-------------|----------------|------------|---------------------|---------------------------|----------------------|------------------|
| pgnam       | relative       | 1.0000E-02 | none                |                           | 1.500                | parabolic        |

Parameter definitions:-

| Name | Trans-formation | Change limit | Initial value | Lower bound | Upper bound |
|------|-----------------|--------------|---------------|-------------|-------------|
|------|-----------------|--------------|---------------|-------------|-------------|

|     |                               |              |         |              |                      |              |
|-----|-------------------------------|--------------|---------|--------------|----------------------|--------------|
| 74  | h1                            | log          | factor  | 33.0000      | 30.0000              | 50.0000      |
| 75  | s1                            | log          | factor  | 510.000      | 1.00000              | 5000.00      |
| 76  | p1                            | log          | factor  | 0.800000     | 0.100000             | 0.999000     |
| 77  | o1                            | log          | factor  | 7.500000E-04 | 1.000000E-10         | 1.000000E-02 |
| 78  |                               |              |         |              |                      |              |
| 79  | Name                          | Group        | Scale   | Offset       | Model command number |              |
| 80  | h1                            | pgram        | 1.00000 | 0.00000      | 1                    |              |
| 81  | s1                            | pgram        | 1.00000 | 0.00000      | 0                    |              |
| 82  | p1                            | pgram        | 1.00000 | 0.00000      | 1                    |              |
| 83  | o1                            | pgram        | 1.00000 | 0.00000      | 0                    |              |
| 84  |                               |              |         |              |                      |              |
| 85  |                               |              |         |              |                      |              |
| 86  | Prior information:-           |              |         |              |                      |              |
| 87  |                               |              |         |              |                      |              |
| 88  | No prior information supplied |              |         |              |                      |              |
| 89  |                               |              |         |              |                      |              |
| 90  |                               |              |         |              |                      |              |
| 91  | Observations:-                |              |         |              |                      |              |
| 92  |                               |              |         |              |                      |              |
| 93  | Observation name              | Observation  | Weight  | Group        |                      |              |
| 94  | o1                            | 5.186150E-16 | 1.000   | conc         |                      |              |
| 95  | o2                            | 6.614330E-16 | 1.000   | conc         |                      |              |
| 96  | o3                            | 6.755630E-16 | 1.000   | conc         |                      |              |
| 97  | o4                            | 2.107200E-14 | 1.000   | conc         |                      |              |
| 98  | o5                            | 0.00000      | 1.000   | conc         |                      |              |
| 99  | o6                            | 3.543900E-13 | 1.000   | conc         |                      |              |
| 100 | o7                            | 0.00000      | 1.000   | conc         |                      |              |
| 101 | o8                            | 4.614550E-12 | 1.000   | conc         |                      |              |
| 102 | o9                            | 0.00000      | 1.000   | conc         |                      |              |
| 103 | o10                           | 4.829760E-11 | 1.000   | conc         |                      |              |
| 104 | o11                           | 0.00000      | 1.000   | conc         |                      |              |
| 105 | o12                           | 3.682830E-10 | 1.000   | conc         |                      |              |
| 106 | o13                           | 2.847080E-10 | 1.000   | conc         |                      |              |
| 107 | o14                           | 1.012680E-09 | 1.000   | conc         |                      |              |
| 108 | o15                           | 1.234790E-08 | 1.000   | conc         |                      |              |
| 109 | o16                           | 0.00000      | 1.000   | conc         |                      |              |
| 110 | o17                           | 2.207160E-07 | 1.000   | conc         |                      |              |
| 111 | o18                           | 0.00000      | 1.000   | conc         |                      |              |
| 112 | o19                           | 2.982970E-06 | 1.000   | conc         |                      |              |
| 113 | o20                           | 0.00000      | 1.000   | conc         |                      |              |
| 114 | o21                           | 3.844780E-05 | 1.000   | conc         |                      |              |
| 115 | o22                           | 1.332810E-04 | 1.000   | conc         |                      |              |
| 116 | o23                           | 4.524700E-05 | 1.000   | conc         |                      |              |
| 117 | o24                           | 0.00000      | 1.000   | conc         |                      |              |
| 118 | o25                           | 0.00000      | 1.000   | conc         |                      |              |
| 119 | o26                           | 3.313920E-03 | 1.000   | conc         |                      |              |
| 120 | o27                           | 4.709680E-03 | 1.000   | conc         |                      |              |
| 121 | o28                           | 3.738630E-03 | 1.000   | conc         |                      |              |
| 122 | o29                           | 0.00000      | 1.000   | conc         |                      |              |
| 123 | o30                           | 0.795515     | 1.000   | conc         |                      |              |
| 124 | o31                           | 0.00000      | 1.000   | conc         |                      |              |
| 125 | o32                           | 18.0567      | 1.000   | conc         |                      |              |
| 126 | o33                           | 0.00000      | 1.000   | conc         |                      |              |
| 127 | o34                           | 158.617      | 1.000   | conc         |                      |              |
| 128 | o35                           | 1021.51      | 1.000   | conc         |                      |              |
| 129 | o36                           | 25461.2      | 1.000   | conc         |                      |              |
| 130 | o37                           | 54889.1      | 1.000   | conc         |                      |              |
| 131 | o38                           | 123252.      | 1.000   | conc         |                      |              |
| 132 | o39                           | 439629.      | 1.000   | conc         |                      |              |
| 133 | o40                           | 997271.      | 1.000   | conc         |                      |              |
| 134 | o41                           | 1.774430E+06 | 1.000   | conc         |                      |              |
| 135 | o42                           | 2.486710E+06 | 1.000   | conc         |                      |              |
| 136 | o43                           | 4.526740E+06 | 1.000   | conc         |                      |              |
| 137 | o44                           | 1.324490E+07 | 1.000   | conc         |                      |              |
| 138 | o45                           | 1.652660E+07 | 1.000   | conc         |                      |              |
| 139 | o46                           | 1.706350E+07 | 1.000   | conc         |                      |              |
| 140 | o47                           | 1.896430E+07 | 1.000   | conc         |                      |              |
| 141 | o48                           | 2.344730E+07 | 1.000   | conc         |                      |              |
| 142 | o49                           | 1.701390E+07 | 1.000   | conc         |                      |              |
| 143 | o50                           | 7.951230E+06 | 1.000   | conc         |                      |              |
| 144 | o51                           | 9.231250E+06 | 1.000   | conc         |                      |              |
| 145 | o52                           | 8.369040E+06 | 1.000   | conc         |                      |              |
| 146 | o53                           | 7.774150E+06 | 1.000   | conc         |                      |              |

|     |      |              |       |      |
|-----|------|--------------|-------|------|
| 147 | o54  | 1.047680E+07 | 1.000 | conc |
| 148 | o55  | 1.058310E+07 | 1.000 | conc |
| 149 | o56  | 7.333510E+06 | 1.000 | conc |
| 150 | o57  | 6.669610E+06 | 1.000 | conc |
| 151 | o58  | 5.939640E+06 | 1.000 | conc |
| 152 | o59  | 9.578960E+06 | 1.000 | conc |
| 153 | o60  | 1.000890E+07 | 1.000 | conc |
| 154 | o61  | 9.376560E+06 | 1.000 | conc |
| 155 | o62  | 1.006980E+07 | 1.000 | conc |
| 156 | o63  | 4.971070E+06 | 1.000 | conc |
| 157 | o64  | 2.447770E+06 | 1.000 | conc |
| 158 | o65  | 3.784400E+06 | 1.000 | conc |
| 159 | o66  | 9.389320E+06 | 1.000 | conc |
| 160 | o67  | 1.016350E+07 | 1.000 | conc |
| 161 | o68  | 5.345640E+06 | 1.000 | conc |
| 162 | o69  | 5.859810E+06 | 1.000 | conc |
| 163 | o70  | 5.246670E+06 | 1.000 | conc |
| 164 | o71  | 6.640150E+06 | 1.000 | conc |
| 165 | o72  | 5.332380E+06 | 1.000 | conc |
| 166 | o73  | 3.356340E+06 | 1.000 | conc |
| 167 | o74  | 2.774270E+06 | 1.000 | conc |
| 168 | o75  | 2.385890E+06 | 1.000 | conc |
| 169 | o76  | 2.952400E+06 | 1.000 | conc |
| 170 | o77  | 2.057460E+06 | 1.000 | conc |
| 171 | o78  | 1.584830E+06 | 1.000 | conc |
| 172 | o79  | 2.916260E+06 | 1.000 | conc |
| 173 | o80  | 2.096230E+06 | 1.000 | conc |
| 174 | o81  | 2.504470E+06 | 1.000 | conc |
| 175 | o82  | 1.829420E+06 | 1.000 | conc |
| 176 | o83  | 830066.      | 1.000 | conc |
| 177 | o84  | 2.518770E+06 | 1.000 | conc |
| 178 | o85  | 2.285180E+06 | 1.000 | conc |
| 179 | o86  | 1.772680E+06 | 1.000 | conc |
| 180 | o87  | 1.961070E+06 | 1.000 | conc |
| 181 | o88  | 1.718450E+06 | 1.000 | conc |
| 182 | o89  | 1.663840E+06 | 1.000 | conc |
| 183 | o90  | 1.764140E+06 | 1.000 | conc |
| 184 | o91  | 1.492310E+06 | 1.000 | conc |
| 185 | o92  | 1.283080E+06 | 1.000 | conc |
| 186 | o93  | 1.473610E+06 | 1.000 | conc |
| 187 | o94  | 1.738380E+06 | 1.000 | conc |
| 188 | o95  | 1.675570E+06 | 1.000 | conc |
| 189 | o96  | 1.604000E+06 | 1.000 | conc |
| 190 | o97  | 889930.      | 1.000 | conc |
| 191 | o98  | 0.00000      | 1.000 | conc |
| 192 | o99  | 0.00000      | 1.000 | conc |
| 193 | o100 | 955486.      | 1.000 | conc |
| 194 | o101 | 1.738130E+06 | 1.000 | conc |
| 195 | o102 | 310564.      | 1.000 | conc |
| 196 | o103 | 0.00000      | 1.000 | conc |
| 197 | o104 | 202705.      | 1.000 | conc |
| 198 | o105 | 166223.      | 1.000 | conc |
| 199 | o106 | 110561.      | 1.000 | conc |
| 200 | o107 | 86750.9      | 1.000 | conc |
| 201 | o108 | 80882.2      | 1.000 | conc |
| 202 | o109 | 89213.7      | 1.000 | conc |
| 203 | o110 | 113375.      | 1.000 | conc |
| 204 | o111 | 136223.      | 1.000 | conc |
| 205 | o112 | 138918.      | 1.000 | conc |
| 206 | o113 | 121682.      | 1.000 | conc |
| 207 | o114 | 121917.      | 1.000 | conc |
| 208 | o115 | 140363.      | 1.000 | conc |
| 209 | o116 | 138477.      | 1.000 | conc |
| 210 | o117 | 118625.      | 1.000 | conc |
| 211 | o118 | 103562.      | 1.000 | conc |
| 212 | o119 | 101237.      | 1.000 | conc |
| 213 | o120 | 107748.      | 1.000 | conc |
| 214 | o121 | 102626.      | 1.000 | conc |
| 215 | o122 | 75468.0      | 1.000 | conc |
| 216 | o123 | 61503.4      | 1.000 | conc |
| 217 | o124 | 76858.3      | 1.000 | conc |
| 218 | o125 | 83796.5      | 1.000 | conc |
| 219 | o126 | 75864.9      | 1.000 | conc |

|     |      |         |       |      |
|-----|------|---------|-------|------|
| 220 | o127 | 78627.1 | 1.000 | conc |
| 221 | o128 | 82993.1 | 1.000 | conc |
| 222 | o129 | 70929.6 | 1.000 | conc |
| 223 | o130 | 61300.5 | 1.000 | conc |
| 224 | o131 | 66857.4 | 1.000 | conc |
| 225 | o132 | 70288.6 | 1.000 | conc |
| 226 | o133 | 58739.3 | 1.000 | conc |
| 227 | o134 | 46363.6 | 1.000 | conc |
| 228 | o135 | 48146.6 | 1.000 | conc |
| 229 | o136 | 69423.2 | 1.000 | conc |
| 230 | o137 | 90789.1 | 1.000 | conc |
| 231 | o138 | 78851.6 | 1.000 | conc |
| 232 | o139 | 55522.4 | 1.000 | conc |
| 233 | o140 | 56299.4 | 1.000 | conc |
| 234 | o141 | 72537.0 | 1.000 | conc |
| 235 | o142 | 86973.6 | 1.000 | conc |
| 236 | o143 | 84790.9 | 1.000 | conc |
| 237 | o144 | 62089.3 | 1.000 | conc |
| 238 | o145 | 47548.6 | 1.000 | conc |
| 239 | o146 | 52955.3 | 1.000 | conc |
| 240 | o147 | 55351.2 | 1.000 | conc |
| 241 | o148 | 51979.7 | 1.000 | conc |
| 242 | o149 | 55427.2 | 1.000 | conc |
| 243 | o150 | 53199.8 | 1.000 | conc |
| 244 | o151 | 33000.8 | 1.000 | conc |
| 245 | o152 | 18162.2 | 1.000 | conc |
| 246 | o153 | 22739.4 | 1.000 | conc |
| 247 | o154 | 33621.3 | 1.000 | conc |
| 248 | o155 | 39197.2 | 1.000 | conc |
| 249 | o156 | 39125.2 | 1.000 | conc |
| 250 | o157 | 35025.4 | 1.000 | conc |
| 251 | o158 | 28518.2 | 1.000 | conc |
| 252 | o159 | 21223.7 | 1.000 | conc |
| 253 | o160 | 14762.2 | 1.000 | conc |
| 254 | o161 | 10753.4 | 1.000 | conc |
| 255 | o162 | 10066.4 | 1.000 | conc |
| 256 | o163 | 11344.4 | 1.000 | conc |
| 257 | o164 | 13039.5 | 1.000 | conc |
| 258 | o165 | 14764.0 | 1.000 | conc |
| 259 | o166 | 16068.4 | 1.000 | conc |
| 260 | o167 | 15455.8 | 1.000 | conc |
| 261 | o168 | 14663.3 | 1.000 | conc |
| 262 | o169 | 19091.1 | 1.000 | conc |
| 263 | o170 | 24352.6 | 1.000 | conc |
| 264 | o171 | 21494.7 | 1.000 | conc |
| 265 | o172 | 14671.8 | 1.000 | conc |
| 266 | o173 | 10655.3 | 1.000 | conc |
| 267 | o174 | 10844.5 | 1.000 | conc |
| 268 | o175 | 14963.9 | 1.000 | conc |
| 269 | o176 | 19019.4 | 1.000 | conc |
| 270 | o177 | 19892.0 | 1.000 | conc |
| 271 | o178 | 19083.0 | 1.000 | conc |
| 272 | o179 | 18695.9 | 1.000 | conc |
| 273 | o180 | 20563.9 | 1.000 | conc |
| 274 | o181 | 24196.4 | 1.000 | conc |
| 275 | o182 | 27794.8 | 1.000 | conc |
| 276 | o183 | 30310.9 | 1.000 | conc |
| 277 | o184 | 31421.3 | 1.000 | conc |
| 278 | o185 | 31982.9 | 1.000 | conc |
| 279 | o186 | 31860.6 | 1.000 | conc |
| 280 | o187 | 25884.9 | 1.000 | conc |
| 281 | o188 | 13221.5 | 1.000 | conc |
| 282 | o189 | 4834.01 | 1.000 | conc |
| 283 | o190 | 5004.64 | 1.000 | conc |
| 284 | o191 | 9007.62 | 1.000 | conc |
| 285 | o192 | 11966.3 | 1.000 | conc |
| 286 | o193 | 12294.3 | 1.000 | conc |
| 287 | o194 | 22618.7 | 1.000 | conc |
| 288 | o195 | 46542.1 | 1.000 | conc |
| 289 | o196 | 59116.4 | 1.000 | conc |
| 290 | o197 | 54086.6 | 1.000 | conc |
| 291 | o198 | 49842.9 | 1.000 | conc |
| 292 | o199 | 49878.8 | 1.000 | conc |

|     |      |         |       |      |
|-----|------|---------|-------|------|
| 293 | o200 | 48086.8 | 1.000 | conc |
| 294 | o201 | 45371.6 | 1.000 | conc |
| 295 | o202 | 48500.7 | 1.000 | conc |
| 296 | o203 | 52492.5 | 1.000 | conc |
| 297 | o204 | 49431.0 | 1.000 | conc |
| 298 | o205 | 45507.9 | 1.000 | conc |
| 299 | o206 | 45413.5 | 1.000 | conc |
| 300 | o207 | 43509.8 | 1.000 | conc |
| 301 | o208 | 39265.3 | 1.000 | conc |
| 302 | o209 | 38196.0 | 1.000 | conc |
| 303 | o210 | 39207.9 | 1.000 | conc |
| 304 | o211 | 37626.7 | 1.000 | conc |
| 305 | o212 | 34032.5 | 1.000 | conc |
| 306 | o213 | 33337.7 | 1.000 | conc |
| 307 | o214 | 36078.7 | 1.000 | conc |
| 308 | o215 | 39600.7 | 1.000 | conc |
| 309 | o216 | 37543.5 | 1.000 | conc |
| 310 | o217 | 30230.7 | 1.000 | conc |
| 311 | o218 | 31305.9 | 1.000 | conc |
| 312 | o219 | 39101.2 | 1.000 | conc |
| 313 | o220 | 37756.0 | 1.000 | conc |
| 314 | o221 | 29402.1 | 1.000 | conc |
| 315 | o222 | 25088.1 | 1.000 | conc |
| 316 | o223 | 26564.8 | 1.000 | conc |
| 317 | o224 | 28123.6 | 1.000 | conc |
| 318 | o225 | 27390.2 | 1.000 | conc |
| 319 | o226 | 24404.7 | 1.000 | conc |
| 320 | o227 | 22055.8 | 1.000 | conc |
| 321 | o228 | 21263.4 | 1.000 | conc |
| 322 | o229 | 18848.2 | 1.000 | conc |
| 323 | o230 | 16756.2 | 1.000 | conc |
| 324 | o231 | 20731.4 | 1.000 | conc |
| 325 | o232 | 27836.6 | 1.000 | conc |
| 326 | o233 | 31507.7 | 1.000 | conc |
| 327 | o234 | 32254.2 | 1.000 | conc |
| 328 | o235 | 34888.8 | 1.000 | conc |
| 329 | o236 | 36437.5 | 1.000 | conc |
| 330 | o237 | 33037.8 | 1.000 | conc |
| 331 | o238 | 27844.2 | 1.000 | conc |
| 332 | o239 | 23663.0 | 1.000 | conc |
| 333 | o240 | 20639.0 | 1.000 | conc |
| 334 | o241 | 18686.5 | 1.000 | conc |
| 335 | o242 | 17719.8 | 1.000 | conc |
| 336 | o243 | 17653.0 | 1.000 | conc |
| 337 | o244 | 18400.6 | 1.000 | conc |
| 338 | o245 | 19876.7 | 1.000 | conc |
| 339 | o246 | 21947.8 | 1.000 | conc |
| 340 | o247 | 22959.0 | 1.000 | conc |
| 341 | o248 | 19972.5 | 1.000 | conc |
| 342 | o249 | 15696.4 | 1.000 | conc |
| 343 | o250 | 14824.8 | 1.000 | conc |
| 344 | o251 | 14163.1 | 1.000 | conc |
| 345 | o252 | 10938.9 | 1.000 | conc |
| 346 | o253 | 9297.15 | 1.000 | conc |
| 347 | o254 | 10474.8 | 1.000 | conc |
| 348 | o255 | 10806.7 | 1.000 | conc |
| 349 | o256 | 8796.51 | 1.000 | conc |
| 350 | o257 | 8014.11 | 1.000 | conc |
| 351 | o258 | 9493.13 | 1.000 | conc |
| 352 | o259 | 11093.2 | 1.000 | conc |
| 353 | o260 | 13360.3 | 1.000 | conc |
| 354 | o261 | 17159.2 | 1.000 | conc |
| 355 | o262 | 17469.6 | 1.000 | conc |
| 356 | o263 | 12117.2 | 1.000 | conc |
| 357 | o264 | 8708.14 | 1.000 | conc |
| 358 | o265 | 10278.4 | 1.000 | conc |
| 359 | o266 | 13136.8 | 1.000 | conc |
| 360 | o267 | 14682.0 | 1.000 | conc |
| 361 | o268 | 15092.5 | 1.000 | conc |
| 362 | o269 | 14703.9 | 1.000 | conc |
| 363 | o270 | 13870.6 | 1.000 | conc |
| 364 | o271 | 14481.2 | 1.000 | conc |
| 365 | o272 | 17999.1 | 1.000 | conc |

|     |      |         |       |      |
|-----|------|---------|-------|------|
| 366 | o273 | 20879.1 | 1.000 | conc |
| 367 | o274 | 20813.3 | 1.000 | conc |
| 368 | o275 | 20470.0 | 1.000 | conc |
| 369 | o276 | 20325.7 | 1.000 | conc |
| 370 | o277 | 17950.9 | 1.000 | conc |
| 371 | o278 | 13279.2 | 1.000 | conc |
| 372 | o279 | 10433.2 | 1.000 | conc |
| 373 | o280 | 10368.9 | 1.000 | conc |
| 374 | o281 | 10902.9 | 1.000 | conc |
| 375 | o282 | 10993.4 | 1.000 | conc |
| 376 | o283 | 10436.0 | 1.000 | conc |
| 377 | o284 | 9908.35 | 1.000 | conc |
| 378 | o285 | 9893.18 | 1.000 | conc |
| 379 | o286 | 10141.9 | 1.000 | conc |
| 380 | o287 | 10404.2 | 1.000 | conc |
| 381 | o288 | 10507.0 | 1.000 | conc |
| 382 | o289 | 10500.4 | 1.000 | conc |
| 383 | o290 | 10687.5 | 1.000 | conc |
| 384 | o291 | 11015.6 | 1.000 | conc |
| 385 | o292 | 11336.7 | 1.000 | conc |
| 386 | o293 | 11502.8 | 1.000 | conc |
| 387 | o294 | 11425.5 | 1.000 | conc |
| 388 | o295 | 11217.6 | 1.000 | conc |
| 389 | o296 | 11033.7 | 1.000 | conc |
| 390 | o297 | 11018.9 | 1.000 | conc |
| 391 | o298 | 11137.2 | 1.000 | conc |
| 392 | o299 | 11192.9 | 1.000 | conc |
| 393 | o300 | 10984.6 | 1.000 | conc |
| 394 | o301 | 10377.9 | 1.000 | conc |
| 395 | o302 | 9476.11 | 1.000 | conc |
| 396 | o303 | 8435.45 | 1.000 | conc |
| 397 | o304 | 7412.14 | 1.000 | conc |
| 398 | o305 | 6542.14 | 1.000 | conc |
| 399 | o306 | 5899.57 | 1.000 | conc |
| 400 | o307 | 5546.75 | 1.000 | conc |
| 401 | o308 | 5538.49 | 1.000 | conc |
| 402 | o309 | 5808.09 | 1.000 | conc |
| 403 | o310 | 6190.55 | 1.000 | conc |
| 404 | o311 | 6518.06 | 1.000 | conc |
| 405 | o312 | 6669.54 | 1.000 | conc |
| 406 | o313 | 6674.79 | 1.000 | conc |
| 407 | o314 | 6594.03 | 1.000 | conc |
| 408 | o315 | 6487.49 | 1.000 | conc |
| 409 | o316 | 6423.96 | 1.000 | conc |
| 410 | o317 | 6495.94 | 1.000 | conc |
| 411 | o318 | 6800.02 | 1.000 | conc |
| 412 | o319 | 7419.38 | 1.000 | conc |
| 413 | o320 | 8246.96 | 1.000 | conc |
| 414 | o321 | 9034.60 | 1.000 | conc |
| 415 | o322 | 9530.89 | 1.000 | conc |
| 416 | o323 | 9568.11 | 1.000 | conc |
| 417 | o324 | 9223.84 | 1.000 | conc |
| 418 | o325 | 8620.39 | 1.000 | conc |
| 419 | o326 | 7880.08 | 1.000 | conc |
| 420 | o327 | 7125.52 | 1.000 | conc |
| 421 | o328 | 6480.04 | 1.000 | conc |
| 422 | o329 | 6067.10 | 1.000 | conc |
| 423 | o330 | 5990.81 | 1.000 | conc |
| 424 | o331 | 6113.39 | 1.000 | conc |
| 425 | o332 | 6132.63 | 1.000 | conc |
| 426 | o333 | 5743.19 | 1.000 | conc |
| 427 | o334 | 4692.77 | 1.000 | conc |
| 428 | o335 | 3278.84 | 1.000 | conc |
| 429 | o336 | 2124.16 | 1.000 | conc |
| 430 | o337 | 1855.75 | 1.000 | conc |
| 431 | o338 | 2987.66 | 1.000 | conc |
| 432 | o339 | 5053.39 | 1.000 | conc |
| 433 | o340 | 7082.62 | 1.000 | conc |
| 434 | o341 | 8104.81 | 1.000 | conc |
| 435 | o342 | 7667.29 | 1.000 | conc |
| 436 | o343 | 6347.40 | 1.000 | conc |
| 437 | o344 | 4844.30 | 1.000 | conc |
| 438 | o345 | 3800.34 | 1.000 | conc |

|     |      |         |       |      |
|-----|------|---------|-------|------|
| 439 | o346 | 3332.00 | 1.000 | conc |
| 440 | o347 | 3271.28 | 1.000 | conc |
| 441 | o348 | 3447.37 | 1.000 | conc |
| 442 | o349 | 3697.06 | 1.000 | conc |
| 443 | o350 | 3916.26 | 1.000 | conc |
| 444 | o351 | 4028.66 | 1.000 | conc |
| 445 | o352 | 3958.99 | 1.000 | conc |
| 446 | o353 | 3720.92 | 1.000 | conc |
| 447 | o354 | 3489.71 | 1.000 | conc |
| 448 | o355 | 3457.76 | 1.000 | conc |
| 449 | o356 | 3786.29 | 1.000 | conc |
| 450 | o357 | 4378.55 | 1.000 | conc |
| 451 | o358 | 5010.24 | 1.000 | conc |
| 452 | o359 | 5456.18 | 1.000 | conc |
| 453 | o360 | 5519.01 | 1.000 | conc |
| 454 | o361 | 5196.47 | 1.000 | conc |
| 455 | o362 | 4569.70 | 1.000 | conc |
| 456 | o363 | 3720.87 | 1.000 | conc |
| 457 | o364 | 2783.53 | 1.000 | conc |
| 458 | o365 | 1976.63 | 1.000 | conc |
| 459 | o366 | 1527.18 | 1.000 | conc |
| 460 | o367 | 1625.43 | 1.000 | conc |
| 461 | o368 | 2187.95 | 1.000 | conc |
| 462 | o369 | 3007.88 | 1.000 | conc |
| 463 | o370 | 3877.77 | 1.000 | conc |
| 464 | o371 | 4609.32 | 1.000 | conc |
| 465 | o372 | 5135.25 | 1.000 | conc |
| 466 | o373 | 5435.37 | 1.000 | conc |
| 467 | o374 | 5489.98 | 1.000 | conc |
| 468 | o375 | 5300.82 | 1.000 | conc |
| 469 | o376 | 4902.23 | 1.000 | conc |
| 470 | o377 | 4331.65 | 1.000 | conc |
| 471 | o378 | 3660.98 | 1.000 | conc |
| 472 | o379 | 3025.59 | 1.000 | conc |
| 473 | o380 | 2567.69 | 1.000 | conc |
| 474 | o381 | 2416.88 | 1.000 | conc |
| 475 | o382 | 2596.80 | 1.000 | conc |
| 476 | o383 | 3077.96 | 1.000 | conc |
| 477 | o384 | 3830.52 | 1.000 | conc |
| 478 | o385 | 4812.50 | 1.000 | conc |
| 479 | o386 | 5895.83 | 1.000 | conc |
| 480 | o387 | 6915.08 | 1.000 | conc |
| 481 | o388 | 7705.17 | 1.000 | conc |
| 482 | o389 | 8137.47 | 1.000 | conc |
| 483 | o390 | 8144.74 | 1.000 | conc |
| 484 | o391 | 7665.61 | 1.000 | conc |
| 485 | o392 | 6666.14 | 1.000 | conc |
| 486 | o393 | 5319.59 | 1.000 | conc |
| 487 | o394 | 3893.92 | 1.000 | conc |
| 488 | o395 | 2657.58 | 1.000 | conc |
| 489 | o396 | 1843.08 | 1.000 | conc |
| 490 | o397 | 1452.31 | 1.000 | conc |
| 491 | o398 | 1396.14 | 1.000 | conc |
| 492 | o399 | 1586.28 | 1.000 | conc |
| 493 | o400 | 1996.92 | 1.000 | conc |
| 494 | o401 | 2698.55 | 1.000 | conc |
| 495 | o402 | 3769.91 | 1.000 | conc |
| 496 | o403 | 5245.89 | 1.000 | conc |
| 497 | o404 | 6863.28 | 1.000 | conc |
| 498 | o405 | 8234.65 | 1.000 | conc |
| 499 | o406 | 8972.15 | 1.000 | conc |
| 500 | o407 | 8786.59 | 1.000 | conc |
| 501 | o408 | 7959.86 | 1.000 | conc |
| 502 | o409 | 6978.88 | 1.000 | conc |
| 503 | o410 | 6322.32 | 1.000 | conc |
| 504 | o411 | 6064.89 | 1.000 | conc |
| 505 | o412 | 5710.94 | 1.000 | conc |
| 506 | o413 | 4721.68 | 1.000 | conc |
| 507 | o414 | 2762.35 | 1.000 | conc |
| 508 | o415 | 750.199 | 1.000 | conc |
| 509 | o416 | 77.2322 | 1.000 | conc |
| 510 | o417 | 2136.35 | 1.000 | conc |
| 511 | o418 | 6022.50 | 1.000 | conc |

|     |      |         |       |      |
|-----|------|---------|-------|------|
| 512 | o419 | 6694.25 | 1.000 | conc |
| 513 | o420 | 5144.10 | 1.000 | conc |
| 514 | o421 | 2885.38 | 1.000 | conc |
| 515 | o422 | 1382.02 | 1.000 | conc |
| 516 | o423 | 1080.33 | 1.000 | conc |
| 517 | o424 | 1470.63 | 1.000 | conc |
| 518 | o425 | 2006.22 | 1.000 | conc |
| 519 | o426 | 2257.46 | 1.000 | conc |
| 520 | o427 | 2243.07 | 1.000 | conc |
| 521 | o428 | 2089.08 | 1.000 | conc |
| 522 | o429 | 1918.42 | 1.000 | conc |
| 523 | o430 | 1783.93 | 1.000 | conc |
| 524 | o431 | 1669.31 | 1.000 | conc |
| 525 | o432 | 1555.32 | 1.000 | conc |
| 526 | o433 | 1425.76 | 1.000 | conc |
| 527 | o434 | 1318.85 | 1.000 | conc |
| 528 | o435 | 1319.69 | 1.000 | conc |
| 529 | o436 | 1514.93 | 1.000 | conc |
| 530 | o437 | 1927.13 | 1.000 | conc |
| 531 | o438 | 2356.48 | 1.000 | conc |
| 532 | o439 | 2554.99 | 1.000 | conc |
| 533 | o440 | 2290.19 | 1.000 | conc |
| 534 | o441 | 1630.71 | 1.000 | conc |
| 535 | o442 | 917.822 | 1.000 | conc |
| 536 | o443 | 502.633 | 1.000 | conc |
| 537 | o444 | 710.489 | 1.000 | conc |
| 538 | o445 | 1465.38 | 1.000 | conc |
| 539 | o446 | 2374.01 | 1.000 | conc |
| 540 | o447 | 3034.49 | 1.000 | conc |
| 541 | o448 | 3179.19 | 1.000 | conc |
| 542 | o449 | 2963.08 | 1.000 | conc |
| 543 | o450 | 2624.07 | 1.000 | conc |
| 544 | o451 | 2389.02 | 1.000 | conc |
| 545 | o452 | 2299.28 | 1.000 | conc |
| 546 | o453 | 2242.04 | 1.000 | conc |
| 547 | o454 | 2099.86 | 1.000 | conc |
| 548 | o455 | 1768.94 | 1.000 | conc |
| 549 | o456 | 1332.86 | 1.000 | conc |
| 550 | o457 | 1010.96 | 1.000 | conc |
| 551 | o458 | 1025.49 | 1.000 | conc |
| 552 | o459 | 1485.10 | 1.000 | conc |
| 553 | o460 | 2173.72 | 1.000 | conc |
| 554 | o461 | 2817.71 | 1.000 | conc |
| 555 | o462 | 3158.16 | 1.000 | conc |
| 556 | o463 | 3153.43 | 1.000 | conc |
| 557 | o464 | 2927.44 | 1.000 | conc |
| 558 | o465 | 2608.26 | 1.000 | conc |
| 559 | o466 | 2318.46 | 1.000 | conc |
| 560 | o467 | 2114.00 | 1.000 | conc |
| 561 | o468 | 2006.63 | 1.000 | conc |
| 562 | o469 | 2007.23 | 1.000 | conc |
| 563 | o470 | 2111.33 | 1.000 | conc |
| 564 | o471 | 2274.46 | 1.000 | conc |
| 565 | o472 | 2445.72 | 1.000 | conc |
| 566 | o473 | 2576.12 | 1.000 | conc |
| 567 | o474 | 2641.08 | 1.000 | conc |
| 568 | o475 | 2633.07 | 1.000 | conc |
| 569 | o476 | 2544.91 | 1.000 | conc |
| 570 | o477 | 2374.42 | 1.000 | conc |
| 571 | o478 | 2172.82 | 1.000 | conc |
| 572 | o479 | 2023.83 | 1.000 | conc |
| 573 | o480 | 2011.43 | 1.000 | conc |
| 574 | o481 | 2162.14 | 1.000 | conc |
| 575 | o482 | 2366.61 | 1.000 | conc |
| 576 | o483 | 2495.85 | 1.000 | conc |
| 577 | o484 | 2434.78 | 1.000 | conc |
| 578 | o485 | 2228.21 | 1.000 | conc |
| 579 | o486 | 2023.19 | 1.000 | conc |
| 580 | o487 | 1968.43 | 1.000 | conc |
| 581 | o488 | 2188.95 | 1.000 | conc |
| 582 | o489 | 2582.80 | 1.000 | conc |
| 583 | o490 | 2921.79 | 1.000 | conc |
| 584 | o491 | 2977.08 | 1.000 | conc |



|     |      |         |       |      |
|-----|------|---------|-------|------|
| 585 | o492 | 2650.13 | 1.000 | conc |
| 586 | o493 | 2123.20 | 1.000 | conc |
| 587 | o494 | 1615.08 | 1.000 | conc |
| 588 | o495 | 1326.27 | 1.000 | conc |
| 589 | o496 | 1270.57 | 1.000 | conc |
| 590 | o497 | 1352.40 | 1.000 | conc |
| 591 | o498 | 1474.85 | 1.000 | conc |
| 592 | o499 | 1549.54 | 1.000 | conc |
| 593 | o500 | 1561.66 | 1.000 | conc |

594  
595

596 Control settings:-

597

|     |                                                              |   |             |
|-----|--------------------------------------------------------------|---|-------------|
| 598 | Initial lambda                                               | : | 10.000      |
| 599 | Lambda adjustment factor                                     | : | 2.0000      |
| 600 | Sufficient new/old phi ratio per optimisation iteration      | : | 0.30000     |
| 601 | Limiting relative phi reduction between lambdas              | : | 1.00000E-02 |
| 602 | Maximum trial lambdas per iteration                          | : | 8           |
| 603 | Forgive model run failure during lamda testing               | : | yes         |
| 604 | Forgive model run failure during Jacobian runs               | : | yes         |
| 605 |                                                              |   |             |
| 606 | Perform Broyden's update of Jacobian matrix                  | : | no          |
| 607 | Undertake observation re-referencing                         | : | no          |
| 608 |                                                              |   |             |
| 609 | Maximum factor parameter change (factor-limited changes)     | : | 10.000      |
| 610 | Maximum relative parameter change (relative-limited changes) | : | na          |
| 611 | Fraction of initial parameter values used in computing       |   |             |
| 612 | change limit for near-zero parameters                        | : | 1.00000E-03 |
| 613 | Allow bending of parameter upgrade vector                    | : | no          |
| 614 | Allow parameters to stick to their bounds                    | : | no          |
| 615 |                                                              |   |             |
| 616 | Relative phi reduction below which to begin use of           |   |             |
| 617 | central derivatives                                          | : | 0.10000     |
| 618 | Iteration at which to first consider derivatives switch      | : | 1           |
| 619 |                                                              |   |             |
| 620 | Relative phi reduction indicating convergence                | : | 0.50000E-02 |
| 621 | Number of phi values required within this range              | : | 4           |
| 622 | Maximum number of consecutive failures to lower phi          | : | 4           |
| 623 | Minimal relative parameter change indicating convergence     | : | 0.50000E-02 |
| 624 | Number of consecutive iterations with minimal param change   | : | 4           |
| 625 | Maximum number of optimisation iterations                    | : | 200         |
| 626 |                                                              |   |             |
| 627 | Attempt automatic user intervention                          | : | no          |
| 628 |                                                              |   |             |
| 629 | Attempt reuse of parameter sensitivities                     | : | no          |
| 630 |                                                              |   |             |
| 631 | Scale parameters by their bounds                             | : | yes         |

632  
633

634 File saving options: -

635

|     |                         |   |     |
|-----|-------------------------|---|-----|
| 636 | Save best JCO file      | : | yes |
| 637 | Save multiple JCO files | : | no  |
| 638 | Save multiple REI files | : | no  |
| 639 | Save multiple PAR files | : | yes |

640  
641

# OPTIMISATION RECORD

642  
643

644 INITIAL CONDITIONS:

645 Sum of squared weighted residuals (ie phi) = 4.78192E+14

646  
647

|     |                          |              |
|-----|--------------------------|--------------|
| 648 | Current parameter values |              |
| 649 | h1                       | 33.0000      |
| 650 | s1                       | 510.000      |
| 651 | p1                       | 0.800000     |
| 652 | o1                       | 7.500000E-04 |

653  
654

|     |                               |   |   |
|-----|-------------------------------|---|---|
| 655 | OPTIMISATION ITERATION NO.    | : | 1 |
| 656 | Model calls so far            | : | 1 |
| 657 | Derivative model calls so far | : | 0 |

```

658 Starting phi for this iteration: 4.78192E+14
659
660 Lambda = 10.000 ----->
661 Phi = 3.79929E+14 ( 0.795 of starting phi)
662
663 Lambda = 5.0000 ----->
664 Phi = 3.79929E+14 ( 0.795 of starting phi)
665
666 No more lambdas: relative phi reduction between lambdas less than 0.0100
667 Lowest phi this iteration: 3.79929E+14
668
669 Current parameter values Previous parameter values
670 h1 34.4779 h1 33.0000
671 s1 1532.35 s1 510.000
672 p1 0.810216 p1 0.800000
673 o1 4.496110E-04 o1 7.500000E-04
674 Maximum factor change: 3.005 ["s1"]
675 Maximum relative change: 2.005 ["s1"]
676
677
678 OPTIMISATION ITERATION NO. : 2
679 Model calls so far : 5
680 Derivative model calls so far : 1
681 Starting phi for this iteration: 3.79929E+14
682
683 Lambda = 5.0000 ----->
684 Phi = 2.22370E+14 ( 0.585 of starting phi)
685
686 Lambda = 2.5000 ----->
687 Phi = 2.22370E+14 ( 0.585 of starting phi)
688
689 No more lambdas: relative phi reduction between lambdas less than 0.0100
690 Lowest phi this iteration: 2.22370E+14
691
692 Current parameter values Previous parameter values
693 h1 33.7862 h1 34.4779
694 s1 1396.30 s1 1532.35
695 p1 0.800007 p1 0.810216
696 o1 5.708461E-04 o1 4.496110E-04
697 Maximum factor change: 1.270 ["o1"]
698 Maximum relative change: 0.2696 ["o1"]
699
700
701 OPTIMISATION ITERATION NO. : 3
702 Model calls so far : 9
703 Derivative model calls so far : 2
704 Starting phi for this iteration: 2.22370E+14
705
706 Lambda = 2.5000 ----->
707 Phi = 2.08110E+14 ( 0.936 of starting phi)
708
709 Lambda = 1.2500 ----->
710 Phi = 2.08110E+14 ( 0.936 of starting phi)
711
712 No more lambdas: relative phi reduction between lambdas less than 0.0100
713 Lowest phi this iteration: 2.08110E+14
714 Relative phi reduction between optimisation iterations less than 0.1000
715 Switch to higher order derivatives calculation
716
717 Current parameter values Previous parameter values
718 h1 33.6670 h1 33.7862
719 s1 1782.84 s1 1396.30
720 p1 0.795725 p1 0.800007
721 o1 5.561629E-04 o1 5.708461E-04
722 Maximum factor change: 1.277 ["s1"]
723 Maximum relative change: 0.2768 ["s1"]
724
725
726 OPTIMISATION ITERATION NO. : 4
727 Model calls so far : 13
728 Derivative model calls so far : 3
729 Starting phi for this iteration: 2.08110E+14
730

```

```

731      Lambda = 1.2500      ----->
732      Phi = 2.05750E+14 ( 0.989 of starting phi)
733
734      Lambda = 0.62500      ----->
735      Phi = 2.05750E+14 ( 0.989 of starting phi)
736
737      No more lambdas: relative phi reduction between lambdas less than 0.0100
738      Lowest phi this iteration: 2.05750E+14
739
740      Current parameter values      Previous parameter values
741      h1      33.7425      h1      33.6670
742      s1      1609.73      s1      1782.84
743      p1      0.796664      p1      0.795725
744      o1      5.389217E-04      o1      5.561629E-04
745      Maximum factor change: 1.108      ["s1"]
746      Maximum relative change: 9.7098E-02      ["s1"]
747
748
749      OPTIMISATION ITERATION NO.      : 5
750      Model calls so far      : 19
751      Derivative model calls so far : 4
752      Starting phi for this iteration: 2.05750E+14
753
754      Lambda = 0.62500      ----->
755      Phi = 2.05663E+14 ( 1.000 of starting phi)
756
757      Lambda = 0.31250      ----->
758      Phi = 2.05663E+14 ( 1.000 of starting phi)
759
760      No more lambdas: relative phi reduction between lambdas less than 0.0100
761      Lowest phi this iteration: 2.05663E+14
762
763      Current parameter values      Previous parameter values
764      h1      33.7443      h1      33.7425
765      s1      1641.24      s1      1609.73
766      p1      0.796750      p1      0.796664
767      o1      5.391827E-04      o1      5.389217E-04
768      Maximum factor change: 1.020      ["s1"]
769      Maximum relative change: 1.9577E-02      ["s1"]
770
771
772      OPTIMISATION ITERATION NO.      : 6
773      Model calls so far      : 25
774      Derivative model calls so far : 5
775      Starting phi for this iteration: 2.05663E+14
776
777      Lambda = 0.31250      ----->
778      Phi = 2.05637E+14 ( 1.000 of starting phi)
779
780      Lambda = 0.15625      ----->
781      Phi = 2.05637E+14 ( 1.000 of starting phi)
782
783      No more lambdas: relative phi reduction between lambdas less than 0.0100
784      Lowest phi this iteration: 2.05637E+14
785
786      Current parameter values      Previous parameter values
787      h1      33.7492      h1      33.7443
788      s1      1635.36      s1      1641.24
789      p1      0.796770      p1      0.796750
790      o1      5.381239E-04      o1      5.391827E-04
791      Maximum factor change: 1.004      ["s1"]
792      Maximum relative change: 3.5811E-03      ["s1"]
793
794
795      OPTIMISATION ITERATION NO.      : 7
796      Model calls so far      : 31
797      Derivative model calls so far : 6
798      Starting phi for this iteration: 2.05637E+14
799
800      Lambda = 0.15625      ----->
801      Phi = 2.05640E+14 ( 1.000 times starting phi)
802
803      Lambda = 7.81250E-02 ----->

```

```

804         Phi = 2.05640E+14 ( 1.000 times starting phi)
805
806     No more lambdas: relative phi reduction between lambdas less than 0.0100
807     Lowest phi this iteration: 2.05640E+14
808
809         Current parameter values                Previous parameter values
810         h1                33.7485                h1                33.7492
811         s1                1638.13                s1                1635.36
812         p1                0.796763                p1                0.796770
813         o1                5.383118E-04                o1                5.381239E-04
814     Maximum factor change: 1.002 ["s1"]
815     Maximum relative change: 1.6892E-03 ["s1"]
816
817     Optimisation complete: the 4 lowest phi's are within a relative distance
818                           of eachother of 5.000E-03
819     Total model calls:      37
820
821     The model has been run one final time using best parameters.
822     Thus all model input files contain best parameter values, and model
823     output files contain model results based on these parameters.
824

```

# 825 826 OPTIMISATION RESULTS

```

827
828     Covariance matrix and parameter confidence intervals cannot be determined:-
829     Memory conservation is operative so that covariance matrix is not calculated.
830

```

```

831
832     Parameters ----->
833

```

| Parameter | Estimated value |
|-----------|-----------------|
| h1        | 33.7492         |
| s1        | 1635.36         |
| p1        | 0.796770        |
| o1        | 5.381239E-04    |

```

839
840     See file mfit.sen for parameter sensitivities.
841

```

```

842
843     Observations ----->
844

```

| Observation | Measured value | Calculated value | Residual      | Weight | Group |
|-------------|----------------|------------------|---------------|--------|-------|
| o1          | 5.186150E-16   | 0.00000          | 5.186150E-16  | 1.000  |       |
| conc        |                |                  |               |        |       |
| o2          | 6.614330E-16   | 3.911353-315     | 6.614330E-16  | 1.000  |       |
| conc        |                |                  |               |        |       |
| o3          | 6.755630E-16   | 5.911513-284     | 6.755630E-16  | 1.000  |       |
| conc        |                |                  |               |        |       |
| o4          | 2.107200E-14   | 2.340870-256     | 2.107200E-14  | 1.000  |       |
| conc        |                |                  |               |        |       |
| o5          | 0.00000        | 9.636611-232     | -9.636611-232 | 1.000  |       |
| conc        |                |                  |               |        |       |
| o6          | 3.543900E-13   | 1.078024-209     | 3.543900E-13  | 1.000  |       |
| conc        |                |                  |               |        |       |
| o7          | 0.00000        | 7.218103-190     | -7.218103-190 | 1.000  |       |
| conc        |                |                  |               |        |       |
| o8          | 4.614550E-12   | 5.568550-172     | 4.614550E-12  | 1.000  |       |
| conc        |                |                  |               |        |       |
| o9          | 0.00000        | 8.560173-156     | -8.560173-156 | 1.000  |       |
| conc        |                |                  |               |        |       |
| o10         | 4.829760E-11   | 4.160521-141     | 4.829760E-11  | 1.000  |       |
| conc        |                |                  |               |        |       |
| o11         | 0.00000        | 9.460560-128     | -9.460560-128 | 1.000  |       |
| conc        |                |                  |               |        |       |
| o12         | 3.682830E-10   | 1.406593-115     | 3.682830E-10  | 1.000  |       |
| conc        |                |                  |               |        |       |
| o13         | 2.847080E-10   | 1.823221-104     | 2.847080E-10  | 1.000  |       |
| conc        |                |                  |               |        |       |
| o14         | 1.012680E-09   | 2.641774E-94     | 1.012680E-09  | 1.000  |       |
| conc        |                |                  |               |        |       |
| o15         | 1.234790E-08   | 5.310304E-85     | 1.234790E-08  | 1.000  |       |
| conc        |                |                  |               |        |       |

|     |      |              |              |               |       |
|-----|------|--------------|--------------|---------------|-------|
| 862 | o16  | 0.00000      | 1.787984E-76 | -1.787984E-76 | 1.000 |
|     | conc |              |              |               |       |
| 863 | o17  | 2.207160E-07 | 1.189573E-68 | 2.207160E-07  | 1.000 |
|     | conc |              |              |               |       |
| 864 | o18  | 0.00000      | 1.808766E-61 | -1.808766E-61 | 1.000 |
|     | conc |              |              |               |       |
| 865 | o19  | 2.982970E-06 | 7.147952E-55 | 2.982970E-06  | 1.000 |
|     | conc |              |              |               |       |
| 866 | o20  | 0.00000      | 8.228708E-49 | -8.228708E-49 | 1.000 |
|     | conc |              |              |               |       |
| 867 | o21  | 3.844780E-05 | 3.054487E-43 | 3.844780E-05  | 1.000 |
|     | conc |              |              |               |       |
| 868 | o22  | 1.332810E-04 | 4.003104E-38 | 1.332810E-04  | 1.000 |
|     | conc |              |              |               |       |
| 869 | o23  | 4.524700E-05 | 2.009114E-33 | 4.524700E-05  | 1.000 |
|     | conc |              |              |               |       |
| 870 | o24  | 0.00000      | 4.154133E-29 | -4.154133E-29 | 1.000 |
|     | conc |              |              |               |       |
| 871 | o25  | 0.00000      | 3.779267E-25 | -3.779267E-25 | 1.000 |
|     | conc |              |              |               |       |
| 872 | o26  | 3.313920E-03 | 1.605508E-21 | 3.313920E-03  | 1.000 |
|     | conc |              |              |               |       |
| 873 | o27  | 4.709680E-03 | 3.361158E-18 | 4.709680E-03  | 1.000 |
|     | conc |              |              |               |       |
| 874 | o28  | 3.738630E-03 | 3.641499E-15 | 3.738630E-03  | 1.000 |
|     | conc |              |              |               |       |
| 875 | o29  | 0.00000      | 2.134619E-12 | -2.134619E-12 | 1.000 |
|     | conc |              |              |               |       |
| 876 | o30  | 0.795515     | 7.050911E-10 | 0.795515      | 1.000 |
|     | conc |              |              |               |       |
| 877 | o31  | 0.00000      | 1.362001E-07 | -1.362001E-07 | 1.000 |
|     | conc |              |              |               |       |
| 878 | o32  | 18.0567      | 1.591792E-05 | 18.0567       | 1.000 |
|     | conc |              |              |               |       |
| 879 | o33  | 0.00000      | 1.161262E-03 | -1.161262E-03 | 1.000 |
|     | conc |              |              |               |       |
| 880 | o34  | 158.617      | 5.442290E-02 | 158.563       | 1.000 |
|     | conc |              |              |               |       |
| 881 | o35  | 1021.51      | 1.68244      | 1019.83       | 1.000 |
|     | conc |              |              |               |       |
| 882 | o36  | 25461.2      | 35.1586      | 25426.0       | 1.000 |
|     | conc |              |              |               |       |
| 883 | o37  | 54889.1      | 508.042      | 54381.1       | 1.000 |
|     | conc |              |              |               |       |
| 884 | o38  | 123252.      | 5184.37      | 118068.       | 1.000 |
|     | conc |              |              |               |       |
| 885 | o39  | 439629.      | 38103.2      | 401526.       | 1.000 |
|     | conc |              |              |               |       |
| 886 | o40  | 997271.      | 205454.      | 791817.       | 1.000 |
|     | conc |              |              |               |       |
| 887 | o41  | 1.774430E+06 | 827102.      | 947328.       | 1.000 |
|     | conc |              |              |               |       |
| 888 | o42  | 2.486710E+06 | 2.528157E+06 | -41447.1      | 1.000 |
|     | conc |              |              |               |       |
| 889 | o43  | 4.526740E+06 | 5.965732E+06 | -1.438992E+06 | 1.000 |
|     | conc |              |              |               |       |
| 890 | o44  | 1.324490E+07 | 1.105499E+07 | 2.189910E+06  | 1.000 |
|     | conc |              |              |               |       |
| 891 | o45  | 1.652660E+07 | 1.639246E+07 | 134145.       | 1.000 |
|     | conc |              |              |               |       |
| 892 | o46  | 1.706350E+07 | 1.989503E+07 | -2.831527E+06 | 1.000 |
|     | conc |              |              |               |       |
| 893 | o47  | 1.896430E+07 | 2.036653E+07 | -1.402232E+06 | 1.000 |
|     | conc |              |              |               |       |
| 894 | o48  | 2.344730E+07 | 1.834823E+07 | 5.099067E+06  | 1.000 |
|     | conc |              |              |               |       |
| 895 | o49  | 1.701390E+07 | 1.541077E+07 | 1.603128E+06  | 1.000 |
|     | conc |              |              |               |       |
| 896 | o50  | 7.951230E+06 | 1.286894E+07 | -4.917707E+06 | 1.000 |
|     | conc |              |              |               |       |
| 897 | o51  | 9.231250E+06 | 1.118894E+07 | -1.957689E+06 | 1.000 |
|     | conc |              |              |               |       |
| 898 | o52  | 8.369040E+06 | 1.022259E+07 | -1.853554E+06 | 1.000 |

|     |             |              |              |               |       |
|-----|-------------|--------------|--------------|---------------|-------|
| 899 | conc<br>o53 | 7.774150E+06 | 9.658084E+06 | -1.883934E+06 | 1.000 |
| 900 | conc<br>o54 | 1.047680E+07 | 9.266509E+06 | 1.210291E+06  | 1.000 |
| 901 | conc<br>o55 | 1.058310E+07 | 8.935110E+06 | 1.647990E+06  | 1.000 |
| 902 | conc<br>o56 | 7.333510E+06 | 8.621998E+06 | -1.288488E+06 | 1.000 |
| 903 | conc<br>o57 | 6.669610E+06 | 8.315177E+06 | -1.645567E+06 | 1.000 |
| 904 | conc<br>o58 | 5.939640E+06 | 8.012312E+06 | -2.072672E+06 | 1.000 |
| 905 | conc<br>o59 | 9.578960E+06 | 7.713532E+06 | 1.865428E+06  | 1.000 |
| 906 | conc<br>o60 | 1.000890E+07 | 7.419419E+06 | 2.589481E+06  | 1.000 |
| 907 | conc<br>o61 | 9.376560E+06 | 7.130564E+06 | 2.245996E+06  | 1.000 |
| 908 | conc<br>o62 | 1.006980E+07 | 6.847483E+06 | 3.222317E+06  | 1.000 |
| 909 | conc<br>o63 | 4.971070E+06 | 6.570614E+06 | -1.599544E+06 | 1.000 |
| 910 | conc<br>o64 | 2.447770E+06 | 6.300320E+06 | -3.852550E+06 | 1.000 |
| 911 | conc<br>o65 | 3.784400E+06 | 6.036897E+06 | -2.252497E+06 | 1.000 |
| 912 | conc<br>o66 | 9.389320E+06 | 5.780581E+06 | 3.608739E+06  | 1.000 |
| 913 | conc<br>o67 | 1.016350E+07 | 5.531553E+06 | 4.631947E+06  | 1.000 |
| 914 | conc<br>o68 | 5.345640E+06 | 5.289944E+06 | 55695.9       | 1.000 |
| 915 | conc<br>o69 | 5.859810E+06 | 5.055841E+06 | 803969.       | 1.000 |
| 916 | conc<br>o70 | 5.246670E+06 | 4.829291E+06 | 417379.       | 1.000 |
| 917 | conc<br>o71 | 6.640150E+06 | 4.610306E+06 | 2.029844E+06  | 1.000 |
| 918 | conc<br>o72 | 5.332380E+06 | 4.398868E+06 | 933512.       | 1.000 |
| 919 | conc<br>o73 | 3.356340E+06 | 4.194930E+06 | -838590.      | 1.000 |
| 920 | conc<br>o74 | 2.774270E+06 | 3.998421E+06 | -1.224151E+06 | 1.000 |
| 921 | conc<br>o75 | 2.385890E+06 | 3.809249E+06 | -1.423359E+06 | 1.000 |
| 922 | conc<br>o76 | 2.952400E+06 | 3.627303E+06 | -674903.      | 1.000 |
| 923 | conc<br>o77 | 2.057460E+06 | 3.452457E+06 | -1.394997E+06 | 1.000 |
| 924 | conc<br>o78 | 1.584830E+06 | 3.284572E+06 | -1.699742E+06 | 1.000 |
| 925 | conc<br>o79 | 2.916260E+06 | 3.123496E+06 | -207236.      | 1.000 |
| 926 | conc<br>o80 | 2.096230E+06 | 2.969069E+06 | -872839.      | 1.000 |
| 927 | conc<br>o81 | 2.504470E+06 | 2.821122E+06 | -316652.      | 1.000 |
| 928 | conc<br>o82 | 1.829420E+06 | 2.679481E+06 | -850061.      | 1.000 |
| 929 | conc<br>o83 | 830066.      | 2.543967E+06 | -1.713901E+06 | 1.000 |
| 930 | conc<br>o84 | 2.518770E+06 | 2.414397E+06 | 104373.       | 1.000 |
| 931 | conc<br>o85 | 2.285180E+06 | 2.290586E+06 | -5405.54      | 1.000 |
| 932 | conc<br>o86 | 1.772680E+06 | 2.172347E+06 | -399667.      | 1.000 |
| 933 | conc<br>o87 | 1.961070E+06 | 2.059495E+06 | -98424.8      | 1.000 |
| 934 | conc<br>o88 | 1.718450E+06 | 1.951842E+06 | -233392.      | 1.000 |

|     |              |              |              |               |       |
|-----|--------------|--------------|--------------|---------------|-------|
| 935 | o89<br>conc  | 1.663840E+06 | 1.849204E+06 | -185364.      | 1.000 |
| 936 | o90<br>conc  | 1.764140E+06 | 1.751397E+06 | 12742.9       | 1.000 |
| 937 | o91<br>conc  | 1.492310E+06 | 1.658240E+06 | -165930.      | 1.000 |
| 938 | o92<br>conc  | 1.283080E+06 | 1.569554E+06 | -286474.      | 1.000 |
| 939 | o93<br>conc  | 1.473610E+06 | 1.485164E+06 | -11553.6      | 1.000 |
| 940 | o94<br>conc  | 1.738380E+06 | 1.404897E+06 | 333483.       | 1.000 |
| 941 | o95<br>conc  | 1.675570E+06 | 1.328586E+06 | 346984.       | 1.000 |
| 942 | o96<br>conc  | 1.604000E+06 | 1.256067E+06 | 347933.       | 1.000 |
| 943 | o97<br>conc  | 889930.      | 1.187179E+06 | -297249.      | 1.000 |
| 944 | o98<br>conc  | 0.00000      | 1.121767E+06 | -1.121767E+06 | 1.000 |
| 945 | o99<br>conc  | 0.00000      | 1.059679E+06 | -1.059679E+06 | 1.000 |
| 946 | o100<br>conc | 955486.      | 1.000770E+06 | -45283.6      | 1.000 |
| 947 | o101<br>conc | 1.738130E+06 | 944895.      | 793235.       | 1.000 |
| 948 | o102<br>conc | 310564.      | 891920.      | -581356.      | 1.000 |
| 949 | o103<br>conc | 0.00000      | 841709.      | -841709.      | 1.000 |
| 950 | o104<br>conc | 202705.      | 794136.      | -591431.      | 1.000 |
| 951 | o105<br>conc | 166223.      | 749077.      | -582854.      | 1.000 |
| 952 | o106<br>conc | 110561.      | 706412.      | -595851.      | 1.000 |
| 953 | o107<br>conc | 86750.9      | 666027.      | -579276.      | 1.000 |
| 954 | o108<br>conc | 80882.2      | 627813.      | -546931.      | 1.000 |
| 955 | o109<br>conc | 89213.7      | 591663.      | -502449.      | 1.000 |
| 956 | o110<br>conc | 113375.      | 557475.      | -444100.      | 1.000 |
| 957 | o111<br>conc | 136223.      | 525154.      | -388931.      | 1.000 |
| 958 | o112<br>conc | 138918.      | 494605.      | -355687.      | 1.000 |
| 959 | o113<br>conc | 121682.      | 465738.      | -344056.      | 1.000 |
| 960 | o114<br>conc | 121917.      | 438470.      | -316553.      | 1.000 |
| 961 | o115<br>conc | 140363.      | 412718.      | -272355.      | 1.000 |
| 962 | o116<br>conc | 138477.      | 388404.      | -249927.      | 1.000 |
| 963 | o117<br>conc | 118625.      | 365453.      | -246828.      | 1.000 |
| 964 | o118<br>conc | 103562.      | 343795.      | -240233.      | 1.000 |
| 965 | o119<br>conc | 101237.      | 323361.      | -222124.      | 1.000 |
| 966 | o120<br>conc | 107748.      | 304087.      | -196339.      | 1.000 |
| 967 | o121<br>conc | 102626.      | 285912.      | -183286.      | 1.000 |
| 968 | o122<br>conc | 75468.0      | 268776.      | -193308.      | 1.000 |
| 969 | o123<br>conc | 61503.4      | 252624.      | -191121.      | 1.000 |
| 970 | o124<br>conc | 76858.3      | 237403.      | -160545.      | 1.000 |
| 971 | o125         | 83796.5      | 223062.      | -139265.      | 1.000 |

|      |              |         |         |          |       |
|------|--------------|---------|---------|----------|-------|
| 972  | conc<br>o126 | 75864.9 | 209553. | -133688. | 1.000 |
| 973  | conc<br>o127 | 78627.1 | 196830. | -118203. | 1.000 |
| 974  | conc<br>o128 | 82993.1 | 184851. | -101858. | 1.000 |
| 975  | conc<br>o129 | 70929.6 | 173573. | -102644. | 1.000 |
| 976  | conc<br>o130 | 61300.5 | 162959. | -101658. | 1.000 |
| 977  | conc<br>o131 | 66857.4 | 152970. | -86112.6 | 1.000 |
| 978  | conc<br>o132 | 70288.6 | 143572. | -73283.6 | 1.000 |
| 979  | conc<br>o133 | 58739.3 | 134732. | -75992.5 | 1.000 |
| 980  | conc<br>o134 | 46363.6 | 126417. | -80053.8 | 1.000 |
| 981  | conc<br>o135 | 48146.6 | 118599. | -70452.4 | 1.000 |
| 982  | conc<br>o136 | 69423.2 | 111248. | -41825.2 | 1.000 |
| 983  | conc<br>o137 | 90789.1 | 104339. | -13549.8 | 1.000 |
| 984  | conc<br>o138 | 78851.6 | 97845.0 | -18993.4 | 1.000 |
| 985  | conc<br>o139 | 55522.4 | 91742.9 | -36220.5 | 1.000 |
| 986  | conc<br>o140 | 56299.4 | 86009.7 | -29710.3 | 1.000 |
| 987  | conc<br>o141 | 72537.0 | 80624.2 | -8087.19 | 1.000 |
| 988  | conc<br>o142 | 86973.6 | 75566.0 | 11407.6  | 1.000 |
| 989  | conc<br>o143 | 84790.9 | 70816.0 | 13974.9  | 1.000 |
| 990  | conc<br>o144 | 62089.3 | 66356.2 | -4266.87 | 1.000 |
| 991  | conc<br>o145 | 47548.6 | 62169.4 | -14620.8 | 1.000 |
| 992  | conc<br>o146 | 52955.3 | 58239.5 | -5284.22 | 1.000 |
| 993  | conc<br>o147 | 55351.2 | 54551.4 | 799.816  | 1.000 |
| 994  | conc<br>o148 | 51979.7 | 51090.6 | 889.077  | 1.000 |
| 995  | conc<br>o149 | 55427.2 | 47843.7 | 7583.51  | 1.000 |
| 996  | conc<br>o150 | 53199.8 | 44797.8 | 8401.99  | 1.000 |
| 997  | conc<br>o151 | 33000.8 | 41940.9 | -8940.14 | 1.000 |
| 998  | conc<br>o152 | 18162.2 | 39261.7 | -21099.5 | 1.000 |
| 999  | conc<br>o153 | 22739.4 | 36749.5 | -14010.1 | 1.000 |
| 1000 | conc<br>o154 | 33621.3 | 34394.1 | -772.809 | 1.000 |
| 1001 | conc<br>o155 | 39197.2 | 32186.1 | 7011.09  | 1.000 |
| 1002 | conc<br>o156 | 39125.2 | 30116.5 | 9008.66  | 1.000 |
| 1003 | conc<br>o157 | 35025.4 | 28177.0 | 6848.42  | 1.000 |
| 1004 | conc<br>o158 | 28518.2 | 26359.5 | 2158.71  | 1.000 |
| 1005 | conc<br>o159 | 21223.7 | 24656.6 | -3432.90 | 1.000 |
| 1006 | conc<br>o160 | 14762.2 | 23061.3 | -8299.10 | 1.000 |
| 1007 | conc<br>o161 | 10753.4 | 21567.0 | -10813.6 | 1.000 |



|      |              |         |         |          |       |
|------|--------------|---------|---------|----------|-------|
| 1008 | o162<br>conc | 10066.4 | 20167.4 | -10101.0 | 1.000 |
| 1009 | o163<br>conc | 11344.4 | 18856.7 | -7512.33 | 1.000 |
| 1010 | o164<br>conc | 13039.5 | 17629.5 | -4589.96 | 1.000 |
| 1011 | o165<br>conc | 14764.0 | 16480.4 | -1716.43 | 1.000 |
| 1012 | o166<br>conc | 16068.4 | 15404.8 | 663.635  | 1.000 |
| 1013 | o167<br>conc | 15455.8 | 14397.9 | 1057.90  | 1.000 |
| 1014 | o168<br>conc | 14663.3 | 13455.6 | 1207.75  | 1.000 |
| 1015 | o169<br>conc | 19091.1 | 12573.7 | 6517.42  | 1.000 |
| 1016 | o170<br>conc | 24352.6 | 11748.5 | 12604.1  | 1.000 |
| 1017 | o171<br>conc | 21494.7 | 10976.4 | 10518.3  | 1.000 |
| 1018 | o172<br>conc | 14671.8 | 10254.2 | 4417.64  | 1.000 |
| 1019 | o173<br>conc | 10655.3 | 9578.53 | 1076.77  | 1.000 |
| 1020 | o174<br>conc | 10844.5 | 8946.61 | 1897.89  | 1.000 |
| 1021 | o175<br>conc | 14963.9 | 8355.63 | 6608.27  | 1.000 |
| 1022 | o176<br>conc | 19019.4 | 7802.99 | 11216.4  | 1.000 |
| 1023 | o177<br>conc | 19892.0 | 7286.26 | 12605.7  | 1.000 |
| 1024 | o178<br>conc | 19083.0 | 6803.15 | 12279.8  | 1.000 |
| 1025 | o179<br>conc | 18695.9 | 6351.53 | 12344.4  | 1.000 |
| 1026 | o180<br>conc | 20563.9 | 5929.38 | 14634.5  | 1.000 |
| 1027 | o181<br>conc | 24196.4 | 5534.82 | 18661.6  | 1.000 |
| 1028 | o182<br>conc | 27794.8 | 5166.09 | 22628.7  | 1.000 |
| 1029 | o183<br>conc | 30310.9 | 4821.51 | 25489.4  | 1.000 |
| 1030 | o184<br>conc | 31421.3 | 4499.55 | 26921.7  | 1.000 |
| 1031 | o185<br>conc | 31982.9 | 4198.75 | 27784.2  | 1.000 |
| 1032 | o186<br>conc | 31860.6 | 3917.73 | 27942.9  | 1.000 |
| 1033 | o187<br>conc | 25884.9 | 3655.24 | 22229.7  | 1.000 |
| 1034 | o188<br>conc | 13221.5 | 3410.06 | 9811.44  | 1.000 |
| 1035 | o189<br>conc | 4834.01 | 3181.07 | 1652.94  | 1.000 |
| 1036 | o190<br>conc | 5004.64 | 2967.23 | 2037.41  | 1.000 |
| 1037 | o191<br>conc | 9007.62 | 2767.55 | 6240.07  | 1.000 |
| 1038 | o192<br>conc | 11966.3 | 2581.11 | 9385.19  | 1.000 |
| 1039 | o193<br>conc | 12294.3 | 2407.05 | 9887.25  | 1.000 |
| 1040 | o194<br>conc | 22618.7 | 2244.56 | 20374.1  | 1.000 |
| 1041 | o195<br>conc | 46542.1 | 2092.88 | 44449.2  | 1.000 |
| 1042 | o196<br>conc | 59116.4 | 1951.30 | 57165.1  | 1.000 |
| 1043 | o197<br>conc | 54086.6 | 1819.17 | 52267.4  | 1.000 |
| 1044 | o198         | 49842.9 | 1695.87 | 48147.0  | 1.000 |

|      |              |         |         |         |       |
|------|--------------|---------|---------|---------|-------|
| 1045 | conc<br>o199 | 49878.8 | 1580.81 | 48298.0 | 1.000 |
| 1046 | conc<br>o200 | 48086.8 | 1473.45 | 46613.4 | 1.000 |
| 1047 | conc<br>o201 | 45371.6 | 1373.28 | 43998.3 | 1.000 |
| 1048 | conc<br>o202 | 48500.7 | 1279.83 | 47220.9 | 1.000 |
| 1049 | conc<br>o203 | 52492.5 | 1192.66 | 51299.8 | 1.000 |
| 1050 | conc<br>o204 | 49431.0 | 1111.35 | 48319.7 | 1.000 |
| 1051 | conc<br>o205 | 45507.9 | 1035.51 | 44472.4 | 1.000 |
| 1052 | conc<br>o206 | 45413.5 | 964.783 | 44448.7 | 1.000 |
| 1053 | conc<br>o207 | 43509.8 | 898.825 | 42611.0 | 1.000 |
| 1054 | conc<br>o208 | 39265.3 | 837.320 | 38428.0 | 1.000 |
| 1055 | conc<br>o209 | 38196.0 | 779.972 | 37416.0 | 1.000 |
| 1056 | conc<br>o210 | 39207.9 | 726.504 | 38481.4 | 1.000 |
| 1057 | conc<br>o211 | 37626.7 | 676.658 | 36950.0 | 1.000 |
| 1058 | conc<br>o212 | 34032.5 | 630.190 | 33402.3 | 1.000 |
| 1059 | conc<br>o213 | 33337.7 | 586.876 | 32750.8 | 1.000 |
| 1060 | conc<br>o214 | 36078.7 | 546.504 | 35532.2 | 1.000 |
| 1061 | conc<br>o215 | 39600.7 | 508.877 | 39091.8 | 1.000 |
| 1062 | conc<br>o216 | 37543.5 | 473.811 | 37069.7 | 1.000 |
| 1063 | conc<br>o217 | 30230.7 | 441.134 | 29789.6 | 1.000 |
| 1064 | conc<br>o218 | 31305.9 | 410.686 | 30895.2 | 1.000 |
| 1065 | conc<br>o219 | 39101.2 | 382.315 | 38718.9 | 1.000 |
| 1066 | conc<br>o220 | 37756.0 | 355.883 | 37400.1 | 1.000 |
| 1067 | conc<br>o221 | 29402.1 | 331.258 | 29070.8 | 1.000 |
| 1068 | conc<br>o222 | 25088.1 | 308.319 | 24779.8 | 1.000 |
| 1069 | conc<br>o223 | 26564.8 | 286.951 | 26277.8 | 1.000 |
| 1070 | conc<br>o224 | 28123.6 | 267.048 | 27856.6 | 1.000 |
| 1071 | conc<br>o225 | 27390.2 | 248.511 | 27141.7 | 1.000 |
| 1072 | conc<br>o226 | 24404.7 | 231.247 | 24173.5 | 1.000 |
| 1073 | conc<br>o227 | 22055.8 | 215.171 | 21840.6 | 1.000 |
| 1074 | conc<br>o228 | 21263.4 | 200.200 | 21063.2 | 1.000 |
| 1075 | conc<br>o229 | 18848.2 | 186.260 | 18661.9 | 1.000 |
| 1076 | conc<br>o230 | 16756.2 | 173.282 | 16582.9 | 1.000 |
| 1077 | conc<br>o231 | 20731.4 | 161.198 | 20570.2 | 1.000 |
| 1078 | conc<br>o232 | 27836.6 | 149.949 | 27686.7 | 1.000 |
| 1079 | conc<br>o233 | 31507.7 | 139.477 | 31368.2 | 1.000 |
| 1080 | conc<br>o234 | 32254.2 | 129.730 | 32124.5 | 1.000 |
|      | conc         |         |         |         |       |

|      |              |         |         |         |       |
|------|--------------|---------|---------|---------|-------|
| 1081 | o235<br>conc | 34888.8 | 120.657 | 34768.1 | 1.000 |
| 1082 | o236<br>conc | 36437.5 | 112.212 | 36325.3 | 1.000 |
| 1083 | o237<br>conc | 33037.8 | 104.353 | 32933.4 | 1.000 |
| 1084 | o238<br>conc | 27844.2 | 97.0390 | 27747.2 | 1.000 |
| 1085 | o239<br>conc | 23663.0 | 90.2330 | 23572.8 | 1.000 |
| 1086 | o240<br>conc | 20639.0 | 83.8999 | 20555.1 | 1.000 |
| 1087 | o241<br>conc | 18686.5 | 78.0072 | 18608.5 | 1.000 |
| 1088 | o242<br>conc | 17719.8 | 72.5247 | 17647.3 | 1.000 |
| 1089 | o243<br>conc | 17653.0 | 67.4239 | 17585.6 | 1.000 |
| 1090 | o244<br>conc | 18400.6 | 62.6788 | 18337.9 | 1.000 |
| 1091 | o245<br>conc | 19876.7 | 58.2646 | 19818.4 | 1.000 |
| 1092 | o246<br>conc | 21947.8 | 54.1585 | 21893.6 | 1.000 |
| 1093 | o247<br>conc | 22959.0 | 50.3393 | 22908.7 | 1.000 |
| 1094 | o248<br>conc | 19972.5 | 46.7871 | 19925.7 | 1.000 |
| 1095 | o249<br>conc | 15696.4 | 43.4834 | 15652.9 | 1.000 |
| 1096 | o250<br>conc | 14824.8 | 40.4109 | 14784.4 | 1.000 |
| 1097 | o251<br>conc | 14163.1 | 37.5538 | 14125.5 | 1.000 |
| 1098 | o252<br>conc | 10938.9 | 34.8969 | 10904.0 | 1.000 |
| 1099 | o253<br>conc | 9297.15 | 32.4265 | 9264.72 | 1.000 |
| 1100 | o254<br>conc | 10474.8 | 30.1295 | 10444.7 | 1.000 |
| 1101 | o255<br>conc | 10806.7 | 27.9938 | 10778.7 | 1.000 |
| 1102 | o256<br>conc | 8796.51 | 26.0084 | 8770.50 | 1.000 |
| 1103 | o257<br>conc | 8014.11 | 24.1626 | 7989.95 | 1.000 |
| 1104 | o258<br>conc | 9493.13 | 22.4467 | 9470.68 | 1.000 |
| 1105 | o259<br>conc | 11093.2 | 20.8517 | 11072.3 | 1.000 |
| 1106 | o260<br>conc | 13360.3 | 19.3692 | 13340.9 | 1.000 |
| 1107 | o261<br>conc | 17159.2 | 17.9913 | 17141.2 | 1.000 |
| 1108 | o262<br>conc | 17469.6 | 16.7106 | 17452.9 | 1.000 |
| 1109 | o263<br>conc | 12117.2 | 15.5204 | 12101.7 | 1.000 |
| 1110 | o264<br>conc | 8708.14 | 14.4143 | 8693.73 | 1.000 |
| 1111 | o265<br>conc | 10278.4 | 13.3864 | 10265.0 | 1.000 |
| 1112 | o266<br>conc | 13136.8 | 12.4313 | 13124.4 | 1.000 |
| 1113 | o267<br>conc | 14682.0 | 11.5438 | 14670.5 | 1.000 |
| 1114 | o268<br>conc | 15092.5 | 10.7192 | 15081.8 | 1.000 |
| 1115 | o269<br>conc | 14703.9 | 9.95306 | 14693.9 | 1.000 |
| 1116 | o270<br>conc | 13870.6 | 9.24129 | 13861.4 | 1.000 |
| 1117 | o271         | 14481.2 | 8.58004 | 14472.6 | 1.000 |

|      |              |         |          |         |       |
|------|--------------|---------|----------|---------|-------|
| 1118 | conc<br>o272 | 17999.1 | 7.96577  | 17991.1 | 1.000 |
| 1119 | conc<br>o273 | 20879.1 | 7.39517  | 20871.7 | 1.000 |
| 1120 | conc<br>o274 | 20813.3 | 6.86514  | 20806.4 | 1.000 |
| 1121 | conc<br>o275 | 20470.0 | 6.37284  | 20463.6 | 1.000 |
| 1122 | conc<br>o276 | 20325.7 | 5.91559  | 20319.8 | 1.000 |
| 1123 | conc<br>o277 | 17950.9 | 5.49092  | 17945.4 | 1.000 |
| 1124 | conc<br>o278 | 13279.2 | 5.09652  | 13274.1 | 1.000 |
| 1125 | conc<br>o279 | 10433.2 | 4.73026  | 10428.5 | 1.000 |
| 1126 | conc<br>o280 | 10368.9 | 4.39014  | 10364.5 | 1.000 |
| 1127 | conc<br>o281 | 10902.9 | 4.07431  | 10898.8 | 1.000 |
| 1128 | conc<br>o282 | 10993.4 | 3.78105  | 10989.6 | 1.000 |
| 1129 | conc<br>o283 | 10436.0 | 3.50875  | 10432.5 | 1.000 |
| 1130 | conc<br>o284 | 9908.35 | 3.25594  | 9905.09 | 1.000 |
| 1131 | conc<br>o285 | 9893.18 | 3.02122  | 9890.16 | 1.000 |
| 1132 | conc<br>o286 | 10141.9 | 2.80331  | 10139.1 | 1.000 |
| 1133 | conc<br>o287 | 10404.2 | 2.60102  | 10401.6 | 1.000 |
| 1134 | conc<br>o288 | 10507.0 | 2.41322  | 10504.6 | 1.000 |
| 1135 | conc<br>o289 | 10500.4 | 2.23891  | 10498.2 | 1.000 |
| 1136 | conc<br>o290 | 10687.5 | 2.07710  | 10685.4 | 1.000 |
| 1137 | conc<br>o291 | 11015.6 | 1.92691  | 11013.7 | 1.000 |
| 1138 | conc<br>o292 | 11336.7 | 1.78751  | 11334.9 | 1.000 |
| 1139 | conc<br>o293 | 11502.8 | 1.65814  | 11501.1 | 1.000 |
| 1140 | conc<br>o294 | 11425.5 | 1.53807  | 11424.0 | 1.000 |
| 1141 | conc<br>o295 | 11217.6 | 1.42664  | 11216.2 | 1.000 |
| 1142 | conc<br>o296 | 11033.7 | 1.32323  | 11032.4 | 1.000 |
| 1143 | conc<br>o297 | 11018.9 | 1.22728  | 11017.7 | 1.000 |
| 1144 | conc<br>o298 | 11137.2 | 1.13824  | 11136.1 | 1.000 |
| 1145 | conc<br>o299 | 11192.9 | 1.05562  | 11191.8 | 1.000 |
| 1146 | conc<br>o300 | 10984.6 | 0.978960 | 10983.6 | 1.000 |
| 1147 | conc<br>o301 | 10377.9 | 0.907836 | 10377.0 | 1.000 |
| 1148 | conc<br>o302 | 9476.11 | 0.841849 | 9475.27 | 1.000 |
| 1149 | conc<br>o303 | 8435.45 | 0.780630 | 8434.67 | 1.000 |
| 1150 | conc<br>o304 | 7412.14 | 0.723837 | 7411.42 | 1.000 |
| 1151 | conc<br>o305 | 6542.14 | 0.671152 | 6541.47 | 1.000 |
| 1152 | conc<br>o306 | 5899.57 | 0.622279 | 5898.95 | 1.000 |
| 1153 | conc<br>o307 | 5546.75 | 0.576945 | 5546.17 | 1.000 |
|      | conc         |         |          |         |       |

|      |              |         |              |         |       |
|------|--------------|---------|--------------|---------|-------|
| 1154 | o308         | 5538.49 | 0.534895     | 5537.96 | 1.000 |
| 1155 | conc<br>o309 | 5808.09 | 0.495892     | 5807.59 | 1.000 |
| 1156 | conc<br>o310 | 6190.55 | 0.459718     | 6190.09 | 1.000 |
| 1157 | conc<br>o311 | 6518.06 | 0.426167     | 6517.63 | 1.000 |
| 1158 | conc<br>o312 | 6669.54 | 0.395052     | 6669.14 | 1.000 |
| 1159 | conc<br>o313 | 6674.79 | 0.366195     | 6674.42 | 1.000 |
| 1160 | conc<br>o314 | 6594.03 | 0.339435     | 6593.69 | 1.000 |
| 1161 | conc<br>o315 | 6487.49 | 0.314620     | 6487.18 | 1.000 |
| 1162 | conc<br>o316 | 6423.96 | 0.291609     | 6423.67 | 1.000 |
| 1163 | conc<br>o317 | 6495.94 | 0.270272     | 6495.67 | 1.000 |
| 1164 | conc<br>o318 | 6800.02 | 0.250488     | 6799.77 | 1.000 |
| 1165 | conc<br>o319 | 7419.38 | 0.232145     | 7419.15 | 1.000 |
| 1166 | conc<br>o320 | 8246.96 | 0.215138     | 8246.74 | 1.000 |
| 1167 | conc<br>o321 | 9034.60 | 0.199370     | 9034.40 | 1.000 |
| 1168 | conc<br>o322 | 9530.89 | 0.184751     | 9530.71 | 1.000 |
| 1169 | conc<br>o323 | 9568.11 | 0.171199     | 9567.94 | 1.000 |
| 1170 | conc<br>o324 | 9223.84 | 0.158636     | 9223.68 | 1.000 |
| 1171 | conc<br>o325 | 8620.39 | 0.146990     | 8620.24 | 1.000 |
| 1172 | conc<br>o326 | 7880.08 | 0.136195     | 7879.94 | 1.000 |
| 1173 | conc<br>o327 | 7125.52 | 0.126189     | 7125.39 | 1.000 |
| 1174 | conc<br>o328 | 6480.04 | 0.116914     | 6479.92 | 1.000 |
| 1175 | conc<br>o329 | 6067.10 | 0.108317     | 6066.99 | 1.000 |
| 1176 | conc<br>o330 | 5990.81 | 0.100349     | 5990.71 | 1.000 |
| 1177 | conc<br>o331 | 6113.39 | 9.296461E-02 | 6113.30 | 1.000 |
| 1178 | conc<br>o332 | 6132.63 | 8.612080E-02 | 6132.54 | 1.000 |
| 1179 | conc<br>o333 | 5743.19 | 7.977834E-02 | 5743.11 | 1.000 |
| 1180 | conc<br>o334 | 4692.77 | 7.390070E-02 | 4692.70 | 1.000 |
| 1181 | conc<br>o335 | 3278.84 | 6.845399E-02 | 3278.77 | 1.000 |
| 1182 | conc<br>o336 | 2124.16 | 6.340678E-02 | 2124.10 | 1.000 |
| 1183 | conc<br>o337 | 1855.75 | 5.872992E-02 | 1855.69 | 1.000 |
| 1184 | conc<br>o338 | 2987.66 | 5.439638E-02 | 2987.61 | 1.000 |
| 1185 | conc<br>o339 | 5053.39 | 5.038109E-02 | 5053.34 | 1.000 |
| 1186 | conc<br>o340 | 7082.62 | 4.666078E-02 | 7082.57 | 1.000 |
| 1187 | conc<br>o341 | 8104.81 | 4.321391E-02 | 8104.77 | 1.000 |
| 1188 | conc<br>o342 | 7667.29 | 4.002047E-02 | 7667.25 | 1.000 |
| 1189 | conc<br>o343 | 6347.40 | 3.706192E-02 | 6347.36 | 1.000 |
| 1190 | conc<br>o344 | 4844.30 | 3.432108E-02 | 4844.27 | 1.000 |

|      |              |         |              |         |       |
|------|--------------|---------|--------------|---------|-------|
| 1191 | conc<br>o345 | 3800.34 | 3.178200E-02 | 3800.31 | 1.000 |
| 1192 | conc<br>o346 | 3332.00 | 2.942990E-02 | 3331.97 | 1.000 |
| 1193 | conc<br>o347 | 3271.28 | 2.725109E-02 | 3271.25 | 1.000 |
| 1194 | conc<br>o348 | 3447.37 | 2.523285E-02 | 3447.34 | 1.000 |
| 1195 | conc<br>o349 | 3697.06 | 2.336341E-02 | 3697.04 | 1.000 |
| 1196 | conc<br>o350 | 3916.26 | 2.163185E-02 | 3916.24 | 1.000 |
| 1197 | conc<br>o351 | 4028.66 | 2.002806E-02 | 4028.64 | 1.000 |
| 1198 | conc<br>o352 | 3958.99 | 1.854264E-02 | 3958.97 | 1.000 |
| 1199 | conc<br>o353 | 3720.92 | 1.716691E-02 | 3720.90 | 1.000 |
| 1200 | conc<br>o354 | 3489.71 | 1.589280E-02 | 3489.69 | 1.000 |
| 1201 | conc<br>o355 | 3457.76 | 1.471285E-02 | 3457.75 | 1.000 |
| 1202 | conc<br>o356 | 3786.29 | 1.362011E-02 | 3786.28 | 1.000 |
| 1203 | conc<br>o357 | 4378.55 | 1.260819E-02 | 4378.54 | 1.000 |
| 1204 | conc<br>o358 | 5010.24 | 1.167112E-02 | 5010.23 | 1.000 |
| 1205 | conc<br>o359 | 5456.18 | 1.080341E-02 | 5456.17 | 1.000 |
| 1206 | conc<br>o360 | 5519.01 | 9.999928E-03 | 5519.00 | 1.000 |
| 1207 | conc<br>o361 | 5196.47 | 9.255954E-03 | 5196.46 | 1.000 |
| 1208 | conc<br>o362 | 4569.70 | 8.567097E-03 | 4569.69 | 1.000 |
| 1209 | conc<br>o363 | 3720.87 | 7.929293E-03 | 3720.86 | 1.000 |
| 1210 | conc<br>o364 | 2783.53 | 7.338774E-03 | 2783.52 | 1.000 |
| 1211 | conc<br>o365 | 1976.63 | 6.792051E-03 | 1976.62 | 1.000 |
| 1212 | conc<br>o366 | 1527.18 | 6.285890E-03 | 1527.17 | 1.000 |
| 1213 | conc<br>o367 | 1625.43 | 5.817295E-03 | 1625.42 | 1.000 |
| 1214 | conc<br>o368 | 2187.95 | 5.383490E-03 | 2187.94 | 1.000 |
| 1215 | conc<br>o369 | 3007.88 | 4.981903E-03 | 3007.88 | 1.000 |
| 1216 | conc<br>o370 | 3877.77 | 4.610151E-03 | 3877.77 | 1.000 |
| 1217 | conc<br>o371 | 4609.32 | 4.266029E-03 | 4609.32 | 1.000 |
| 1218 | conc<br>o372 | 5135.25 | 3.947491E-03 | 5135.25 | 1.000 |
| 1219 | conc<br>o373 | 5435.37 | 3.652643E-03 | 5435.37 | 1.000 |
| 1220 | conc<br>o374 | 5489.98 | 3.379730E-03 | 5489.98 | 1.000 |
| 1221 | conc<br>o375 | 5300.82 | 3.127129E-03 | 5300.82 | 1.000 |
| 1222 | conc<br>o376 | 4902.23 | 2.893333E-03 | 4902.23 | 1.000 |
| 1223 | conc<br>o377 | 4331.65 | 2.676948E-03 | 4331.65 | 1.000 |
| 1224 | conc<br>o378 | 3660.98 | 2.476683E-03 | 3660.98 | 1.000 |
| 1225 | conc<br>o379 | 3025.59 | 2.291342E-03 | 3025.59 | 1.000 |
| 1226 | conc<br>o380 | 2567.69 | 2.119818E-03 | 2567.69 | 1.000 |

|      |              |         |              |         |       |
|------|--------------|---------|--------------|---------|-------|
| 1227 | o381<br>conc | 2416.88 | 1.961085E-03 | 2416.88 | 1.000 |
| 1228 | o382<br>conc | 2596.80 | 1.814192E-03 | 2596.80 | 1.000 |
| 1229 | o383<br>conc | 3077.96 | 1.678260E-03 | 3077.96 | 1.000 |
| 1230 | o384<br>conc | 3830.52 | 1.552475E-03 | 3830.52 | 1.000 |
| 1231 | o385<br>conc | 4812.50 | 1.436082E-03 | 4812.50 | 1.000 |
| 1232 | o386<br>conc | 5895.83 | 1.328383E-03 | 5895.83 | 1.000 |
| 1233 | o387<br>conc | 6915.08 | 1.228731E-03 | 6915.08 | 1.000 |
| 1234 | o388<br>conc | 7705.17 | 1.136526E-03 | 7705.17 | 1.000 |
| 1235 | o389<br>conc | 8137.47 | 1.051215E-03 | 8137.47 | 1.000 |
| 1236 | o390<br>conc | 8144.74 | 9.722848E-04 | 8144.74 | 1.000 |
| 1237 | o391<br>conc | 7665.61 | 8.992590E-04 | 7665.61 | 1.000 |
| 1238 | o392<br>conc | 6666.14 | 8.316981E-04 | 6666.14 | 1.000 |
| 1239 | o393<br>conc | 5319.59 | 7.691947E-04 | 5319.59 | 1.000 |
| 1240 | o394<br>conc | 3893.92 | 7.113716E-04 | 3893.92 | 1.000 |
| 1241 | o395<br>conc | 2657.58 | 6.578796E-04 | 2657.58 | 1.000 |
| 1242 | o396<br>conc | 1843.08 | 6.083957E-04 | 1843.08 | 1.000 |
| 1243 | o397<br>conc | 1452.31 | 5.626206E-04 | 1452.31 | 1.000 |
| 1244 | o398<br>conc | 1396.14 | 5.202774E-04 | 1396.14 | 1.000 |
| 1245 | o399<br>conc | 1586.28 | 4.811098E-04 | 1586.28 | 1.000 |
| 1246 | o400<br>conc | 1996.92 | 4.448804E-04 | 1996.92 | 1.000 |
| 1247 | o401<br>conc | 2698.55 | 4.113698E-04 | 2698.55 | 1.000 |
| 1248 | o402<br>conc | 3769.91 | 3.803745E-04 | 3769.91 | 1.000 |
| 1249 | o403<br>conc | 5245.89 | 3.517066E-04 | 5245.89 | 1.000 |
| 1250 | o404<br>conc | 6863.28 | 3.251919E-04 | 6863.28 | 1.000 |
| 1251 | o405<br>conc | 8234.65 | 3.006692E-04 | 8234.65 | 1.000 |
| 1252 | o406<br>conc | 8972.15 | 2.779895E-04 | 8972.15 | 1.000 |
| 1253 | o407<br>conc | 8786.59 | 2.570148E-04 | 8786.59 | 1.000 |
| 1254 | o408<br>conc | 7959.86 | 2.376172E-04 | 7959.86 | 1.000 |
| 1255 | o409<br>conc | 6978.88 | 2.196787E-04 | 6978.88 | 1.000 |
| 1256 | o410<br>conc | 6322.32 | 2.030900E-04 | 6322.32 | 1.000 |
| 1257 | o411<br>conc | 6064.89 | 1.877497E-04 | 6064.89 | 1.000 |
| 1258 | o412<br>conc | 5710.94 | 1.735643E-04 | 5710.94 | 1.000 |
| 1259 | o413<br>conc | 4721.68 | 1.604471E-04 | 4721.68 | 1.000 |
| 1260 | o414<br>conc | 2762.35 | 1.483180E-04 | 2762.35 | 1.000 |
| 1261 | o415<br>conc | 750.199 | 1.371028E-04 | 750.199 | 1.000 |
| 1262 | o416<br>conc | 77.2322 | 1.267328E-04 | 77.2321 | 1.000 |
| 1263 | o417         | 2136.35 | 1.171447E-04 | 2136.35 | 1.000 |

|      |              |         |              |         |       |
|------|--------------|---------|--------------|---------|-------|
| 1264 | conc<br>o418 | 6022.50 | 1.082796E-04 | 6022.50 | 1.000 |
| 1265 | conc<br>o419 | 6694.25 | 1.000833E-04 | 6694.25 | 1.000 |
| 1266 | conc<br>o420 | 5144.10 | 9.250536E-05 | 5144.10 | 1.000 |
| 1267 | conc<br>o421 | 2885.38 | 8.549938E-05 | 2885.38 | 1.000 |
| 1268 | conc<br>o422 | 1382.02 | 7.902231E-05 | 1382.02 | 1.000 |
| 1269 | conc<br>o423 | 1080.33 | 7.303437E-05 | 1080.33 | 1.000 |
| 1270 | conc<br>o424 | 1470.63 | 6.749873E-05 | 1470.63 | 1.000 |
| 1271 | conc<br>o425 | 2006.22 | 6.238135E-05 | 2006.22 | 1.000 |
| 1272 | conc<br>o426 | 2257.46 | 5.765073E-05 | 2257.46 | 1.000 |
| 1273 | conc<br>o427 | 2243.07 | 5.327773E-05 | 2243.07 | 1.000 |
| 1274 | conc<br>o428 | 2089.08 | 4.923541E-05 | 2089.08 | 1.000 |
| 1275 | conc<br>o429 | 1918.42 | 4.549885E-05 | 1918.42 | 1.000 |
| 1276 | conc<br>o430 | 1783.93 | 4.204498E-05 | 1783.93 | 1.000 |
| 1277 | conc<br>o431 | 1669.31 | 3.885250E-05 | 1669.31 | 1.000 |
| 1278 | conc<br>o432 | 1555.32 | 3.590169E-05 | 1555.32 | 1.000 |
| 1279 | conc<br>o433 | 1425.76 | 3.317431E-05 | 1425.76 | 1.000 |
| 1280 | conc<br>o434 | 1318.85 | 3.065349E-05 | 1318.85 | 1.000 |
| 1281 | conc<br>o435 | 1319.69 | 2.832365E-05 | 1319.69 | 1.000 |
| 1282 | conc<br>o436 | 1514.93 | 2.617035E-05 | 1514.93 | 1.000 |
| 1283 | conc<br>o437 | 1927.13 | 2.418028E-05 | 1927.13 | 1.000 |
| 1284 | conc<br>o438 | 2356.48 | 2.234108E-05 | 2356.48 | 1.000 |
| 1285 | conc<br>o439 | 2554.99 | 2.064136E-05 | 2554.99 | 1.000 |
| 1286 | conc<br>o440 | 2290.19 | 1.907057E-05 | 2290.19 | 1.000 |
| 1287 | conc<br>o441 | 1630.71 | 1.761897E-05 | 1630.71 | 1.000 |
| 1288 | conc<br>o442 | 917.822 | 1.627754E-05 | 917.822 | 1.000 |
| 1289 | conc<br>o443 | 502.633 | 1.503794E-05 | 502.633 | 1.000 |
| 1290 | conc<br>o444 | 710.489 | 1.389247E-05 | 710.489 | 1.000 |
| 1291 | conc<br>o445 | 1465.38 | 1.283399E-05 | 1465.38 | 1.000 |
| 1292 | conc<br>o446 | 2374.01 | 1.185593E-05 | 2374.01 | 1.000 |
| 1293 | conc<br>o447 | 3034.49 | 1.095220E-05 | 3034.49 | 1.000 |
| 1294 | conc<br>o448 | 3179.19 | 1.011715E-05 | 3179.19 | 1.000 |
| 1295 | conc<br>o449 | 2963.08 | 9.345592E-06 | 2963.08 | 1.000 |
| 1296 | conc<br>o450 | 2624.07 | 8.632708E-06 | 2624.07 | 1.000 |
| 1297 | conc<br>o451 | 2389.02 | 7.974048E-06 | 2389.02 | 1.000 |
| 1298 | conc<br>o452 | 2299.28 | 7.365502E-06 | 2299.28 | 1.000 |
| 1299 | conc<br>o453 | 2242.04 | 6.803268E-06 | 2242.04 | 1.000 |
|      | conc         |         |              |         |       |



|      |              |         |              |         |       |
|------|--------------|---------|--------------|---------|-------|
| 1300 | o454<br>conc | 2099.86 | 6.283831E-06 | 2099.86 | 1.000 |
| 1301 | o455<br>conc | 1768.94 | 5.803943E-06 | 1768.94 | 1.000 |
| 1302 | o456<br>conc | 1332.86 | 5.360602E-06 | 1332.86 | 1.000 |
| 1303 | o457<br>conc | 1010.96 | 4.951033E-06 | 1010.96 | 1.000 |
| 1304 | o458<br>conc | 1025.49 | 4.572670E-06 | 1025.49 | 1.000 |
| 1305 | o459<br>conc | 1485.10 | 4.223143E-06 | 1485.10 | 1.000 |
| 1306 | o460<br>conc | 2173.72 | 3.900261E-06 | 2173.72 | 1.000 |
| 1307 | o461<br>conc | 2817.71 | 3.601997E-06 | 2817.71 | 1.000 |
| 1308 | o462<br>conc | 3158.16 | 3.326481E-06 | 3158.16 | 1.000 |
| 1309 | o463<br>conc | 3153.43 | 3.071982E-06 | 3153.43 | 1.000 |
| 1310 | o464<br>conc | 2927.44 | 2.836902E-06 | 2927.44 | 1.000 |
| 1311 | o465<br>conc | 2608.26 | 2.619763E-06 | 2608.26 | 1.000 |
| 1312 | o466<br>conc | 2318.46 | 2.419200E-06 | 2318.46 | 1.000 |
| 1313 | o467<br>conc | 2114.00 | 2.233950E-06 | 2114.00 | 1.000 |
| 1314 | o468<br>conc | 2006.63 | 2.062849E-06 | 2006.63 | 1.000 |
| 1315 | o469<br>conc | 2007.23 | 1.904817E-06 | 2007.23 | 1.000 |
| 1316 | o470<br>conc | 2111.33 | 1.758861E-06 | 2111.33 | 1.000 |
| 1317 | o471<br>conc | 2274.46 | 1.624059E-06 | 2274.46 | 1.000 |
| 1318 | o472<br>conc | 2445.72 | 1.499562E-06 | 2445.72 | 1.000 |
| 1319 | o473<br>conc | 2576.12 | 1.384584E-06 | 2576.12 | 1.000 |
| 1320 | o474<br>conc | 2641.08 | 1.278398E-06 | 2641.08 | 1.000 |
| 1321 | o475<br>conc | 2633.07 | 1.180336E-06 | 2633.07 | 1.000 |
| 1322 | o476<br>conc | 2544.91 | 1.089776E-06 | 2544.91 | 1.000 |
| 1323 | o477<br>conc | 2374.42 | 1.006146E-06 | 2374.42 | 1.000 |
| 1324 | o478<br>conc | 2172.82 | 9.289179E-07 | 2172.82 | 1.000 |
| 1325 | o479<br>conc | 2023.83 | 8.576025E-07 | 2023.83 | 1.000 |
| 1326 | o480<br>conc | 2011.43 | 7.917482E-07 | 2011.43 | 1.000 |
| 1327 | o481<br>conc | 2162.14 | 7.309381E-07 | 2162.14 | 1.000 |
| 1328 | o482<br>conc | 2366.61 | 6.747868E-07 | 2366.61 | 1.000 |
| 1329 | o483<br>conc | 2495.85 | 6.229382E-07 | 2495.85 | 1.000 |
| 1330 | o484<br>conc | 2434.78 | 5.750637E-07 | 2434.78 | 1.000 |
| 1331 | o485<br>conc | 2228.21 | 5.308592E-07 | 2228.21 | 1.000 |
| 1332 | o486<br>conc | 2023.19 | 4.900443E-07 | 2023.19 | 1.000 |
| 1333 | o487<br>conc | 1968.43 | 4.523598E-07 | 1968.43 | 1.000 |
| 1334 | o488<br>conc | 2188.95 | 4.175660E-07 | 2188.95 | 1.000 |
| 1335 | o489<br>conc | 2582.80 | 3.854419E-07 | 2582.80 | 1.000 |
| 1336 | o490         | 2921.79 | 3.557831E-07 | 2921.79 | 1.000 |

|      |              |         |              |         |       |
|------|--------------|---------|--------------|---------|-------|
| 1337 | conc<br>o491 | 2977.08 | 3.284010E-07 | 2977.08 | 1.000 |
| 1338 | conc<br>o492 | 2650.13 | 3.031211E-07 | 2650.13 | 1.000 |
| 1339 | conc<br>o493 | 2123.20 | 2.797826E-07 | 2123.20 | 1.000 |
| 1340 | conc<br>o494 | 1615.08 | 2.582367E-07 | 1615.08 | 1.000 |
| 1341 | conc<br>o495 | 1326.27 | 2.383460E-07 | 1326.27 | 1.000 |
| 1342 | conc<br>o496 | 1270.57 | 2.199838E-07 | 1270.57 | 1.000 |
| 1343 | conc<br>o497 | 1352.40 | 2.030328E-07 | 1352.40 | 1.000 |
| 1344 | conc<br>o498 | 1474.85 | 1.873849E-07 | 1474.85 | 1.000 |
| 1345 | conc<br>o499 | 1549.54 | 1.729402E-07 | 1549.54 | 1.000 |
| 1346 | conc<br>o500 | 1561.66 | 1.596063E-07 | 1561.66 | 1.000 |

1347  
1348 See file mfit.res for more details of residuals in graph-ready format.

1349  
1350 See file mfit.seo for composite observation sensitivities.

1351  
1352  
1353 Objective function ----->

1354  
1355 Sum of squared weighted residuals (ie phi) = 2.0564E+14

1356  
1357  
1358 Correlation Coefficient ----->

1359  
1360 Correlation coefficient = 0.96796

1361  
1362  
1363 Analysis of residuals ----->

1364  
1365 All residuals:-

|      |                                               |               |
|------|-----------------------------------------------|---------------|
| 1366 | Number of residuals with non-zero weight      | = 500         |
| 1367 | Mean value of non-zero weighted residuals     | = -2.4301E+04 |
| 1368 | Maximum weighted residual [observation "o48"] | = 5.0991E+06  |
| 1369 | Minimum weighted residual [observation "o50"] | = -4.9177E+06 |
| 1370 | Standard variance of weighted residuals       | = 4.1459E+11  |
| 1371 | Standard error of weighted residuals          | = 6.4389E+05  |

1372  
1373 Note: the above variance was obtained by dividing the objective  
1374 function by the number of system degrees of freedom (ie. number of  
1375 observations with non-zero weight plus number of prior information  
1376 articles with non-zero weight minus the number of adjustable parameters.)  
1377 If the degrees of freedom is negative the divisor becomes  
1378 the number of observations with non-zero weight plus the number of  
1379 prior information items with non-zero weight.

1380  
1381  
1382 Covariance and other statistical matrices cannot be determined:-  
1383 Memory conservation is operative so that covariance matrix is not calculated.

1384  
1385
