# Supplementary material for: Comparing the Fate and Transport of MS2 Bacteriophage and Sodium Fluorescein in a Karstic Chalk Aquifer
Source: MDPI journal article supplement (doi:10.3390/pathogens13020168), 2024-02-13
Supplement: s1 [file s1]

# PEST RUN RECORD: CASE mfit

PEST Version: 16.1

PEST run mode:-

Parameter estimation mode

Case dimensions:-

|                                 |   |     |
|---------------------------------|---|-----|
| Number of parameters            | : | 4   |
| Number of adjustable parameters | : | 4   |
| Number of parameter groups      | : | 1   |
| Number of observations          | : | 500 |
| Number of prior estimates       | : | 0   |

Model command line(s):-

MDP\_2RNE

Jacobian command line:-

MDP\_2RNE /d  
Jacobian read from file Deriv.txt  
This is an ASCII file.

Model interface files:-

Templates:  
MFIT.tpl  
for model input files:  
Input.txt  
  
(Parameter values written using single precision protocol.)  
(Decimal point always included.)  
  
Instruction files:  
MFIT.ins  
for reading model output files:  
Output.txt

PEST-to-model message file:-

na

Singular value decomposition:-

|                                          |   |              |
|------------------------------------------|---|--------------|
| Perform SVD on $XtQX$ or $Q^{(1/2)}X$    | : | $Q^{(1/2)}X$ |
| Max. number of singular values to employ | : | 4            |
| Ratio of lowest/highest singular value   | : | 5.000000E-07 |
| Record eigenvectors in SVD file          | : | yes          |

Derivatives calculation:-

| Param group | Increment type | Increment  | Increment low bound | Forward or central switch | Multiplier (central) | Method (central) |
|-------------|----------------|------------|---------------------|---------------------------|----------------------|------------------|
| pgnam       | relative       | 1.0000E-02 | none                |                           | 1.500                | parabolic        |

Parameter definitions:-

| Name | Trans-formation | Change limit | Initial value | Lower bound | Upper bound |
|------|-----------------|--------------|---------------|-------------|-------------|
|------|-----------------|--------------|---------------|-------------|-------------|

|     |                               |              |         |              |                      |              |
|-----|-------------------------------|--------------|---------|--------------|----------------------|--------------|
| 74  | h1                            | log          | factor  | 40.0000      | 30.0000              | 50.0000      |
| 75  | s1                            | log          | factor  | 250.000      | 1.00000              | 5000.00      |
| 76  | p1                            | log          | factor  | 0.900000     | 0.100000             | 0.999000     |
| 77  | o1                            | log          | factor  | 1.000000E-05 | 1.000000E-10         | 1.000000E-02 |
| 78  |                               |              |         |              |                      |              |
| 79  | Name                          | Group        | Scale   | Offset       | Model command number |              |
| 80  | h1                            | pgram        | 1.00000 | 0.00000      | 1                    |              |
| 81  | s1                            | pgram        | 1.00000 | 0.00000      | 0                    |              |
| 82  | p1                            | pgram        | 1.00000 | 0.00000      | 1                    |              |
| 83  | o1                            | pgram        | 1.00000 | 0.00000      | 0                    |              |
| 84  |                               |              |         |              |                      |              |
| 85  |                               |              |         |              |                      |              |
| 86  | Prior information:-           |              |         |              |                      |              |
| 87  |                               |              |         |              |                      |              |
| 88  | No prior information supplied |              |         |              |                      |              |
| 89  |                               |              |         |              |                      |              |
| 90  |                               |              |         |              |                      |              |
| 91  | Observations:-                |              |         |              |                      |              |
| 92  |                               |              |         |              |                      |              |
| 93  | Observation name              | Observation  | Weight  | Group        |                      |              |
| 94  | o1                            | 2.590000E-08 | 1.000   | conc         |                      |              |
| 95  | o2                            | 6.041790E-08 | 1.000   | conc         |                      |              |
| 96  | o3                            | 7.045510E-08 | 1.000   | conc         |                      |              |
| 97  | o4                            | 6.061850E-08 | 1.000   | conc         |                      |              |
| 98  | o5                            | 4.035480E-08 | 1.000   | conc         |                      |              |
| 99  | o6                            | 1.840630E-08 | 1.000   | conc         |                      |              |
| 100 | o7                            | 2.862080E-09 | 1.000   | conc         |                      |              |
| 101 | o8                            | 1.398620E-09 | 1.000   | conc         |                      |              |
| 102 | o9                            | 1.242340E-08 | 1.000   | conc         |                      |              |
| 103 | o10                           | 2.511130E-08 | 1.000   | conc         |                      |              |
| 104 | o11                           | 2.840230E-08 | 1.000   | conc         |                      |              |
| 105 | o12                           | 1.623870E-08 | 1.000   | conc         |                      |              |
| 106 | o13                           | 1.391590E-09 | 1.000   | conc         |                      |              |
| 107 | o14                           | 0.00000      | 1.000   | conc         |                      |              |
| 108 | o15                           | 8.042150E-09 | 1.000   | conc         |                      |              |
| 109 | o16                           | 2.323690E-08 | 1.000   | conc         |                      |              |
| 110 | o17                           | 3.486020E-08 | 1.000   | conc         |                      |              |
| 111 | o18                           | 3.221440E-08 | 1.000   | conc         |                      |              |
| 112 | o19                           | 2.012160E-08 | 1.000   | conc         |                      |              |
| 113 | o20                           | 1.820490E-08 | 1.000   | conc         |                      |              |
| 114 | o21                           | 2.995640E-08 | 1.000   | conc         |                      |              |
| 115 | o22                           | 3.351660E-08 | 1.000   | conc         |                      |              |
| 116 | o23                           | 1.735370E-08 | 1.000   | conc         |                      |              |
| 117 | o24                           | 0.00000      | 1.000   | conc         |                      |              |
| 118 | o25                           | 0.00000      | 1.000   | conc         |                      |              |
| 119 | o26                           | 1.827050E-09 | 1.000   | conc         |                      |              |
| 120 | o27                           | 0.00000      | 1.000   | conc         |                      |              |
| 121 | o28                           | 2.878970E-09 | 1.000   | conc         |                      |              |
| 122 | o29                           | 2.847040E-08 | 1.000   | conc         |                      |              |
| 123 | o30                           | 5.884060E-08 | 1.000   | conc         |                      |              |
| 124 | o31                           | 5.537600E-08 | 1.000   | conc         |                      |              |
| 125 | o32                           | 2.838700E-08 | 1.000   | conc         |                      |              |
| 126 | o33                           | 3.754250E-08 | 1.000   | conc         |                      |              |
| 127 | o34                           | 9.696690E-08 | 1.000   | conc         |                      |              |
| 128 | o35                           | 1.449780E-07 | 1.000   | conc         |                      |              |
| 129 | o36                           | 1.388220E-07 | 1.000   | conc         |                      |              |
| 130 | o37                           | 1.008400E-07 | 1.000   | conc         |                      |              |
| 131 | o38                           | 6.353650E-08 | 1.000   | conc         |                      |              |
| 132 | o39                           | 5.595610E-08 | 1.000   | conc         |                      |              |
| 133 | o40                           | 6.928060E-08 | 1.000   | conc         |                      |              |
| 134 | o41                           | 7.249730E-08 | 1.000   | conc         |                      |              |
| 135 | o42                           | 5.923150E-08 | 1.000   | conc         |                      |              |
| 136 | o43                           | 4.597250E-08 | 1.000   | conc         |                      |              |
| 137 | o44                           | 4.046490E-08 | 1.000   | conc         |                      |              |
| 138 | o45                           | 4.299730E-08 | 1.000   | conc         |                      |              |
| 139 | o46                           | 4.403430E-08 | 1.000   | conc         |                      |              |
| 140 | o47                           | 4.280100E-08 | 1.000   | conc         |                      |              |
| 141 | o48                           | 5.510130E-08 | 1.000   | conc         |                      |              |
| 142 | o49                           | 7.098810E-08 | 1.000   | conc         |                      |              |
| 143 | o50                           | 6.257670E-08 | 1.000   | conc         |                      |              |
| 144 | o51                           | 3.340120E-08 | 1.000   | conc         |                      |              |
| 145 | o52                           | 2.130400E-09 | 1.000   | conc         |                      |              |
| 146 | o53                           | 1.315980E-08 | 1.000   | conc         |                      |              |

|     |      |              |       |      |
|-----|------|--------------|-------|------|
| 147 | o54  | 1.742090E-07 | 1.000 | conc |
| 148 | o55  | 6.601930E-07 | 1.000 | conc |
| 149 | o56  | 1.501590E-06 | 1.000 | conc |
| 150 | o57  | 2.390120E-06 | 1.000 | conc |
| 151 | o58  | 3.116340E-06 | 1.000 | conc |
| 152 | o59  | 4.010250E-06 | 1.000 | conc |
| 153 | o60  | 5.504160E-06 | 1.000 | conc |
| 154 | o61  | 7.889550E-06 | 1.000 | conc |
| 155 | o62  | 1.136910E-05 | 1.000 | conc |
| 156 | o63  | 1.576620E-05 | 1.000 | conc |
| 157 | o64  | 2.067220E-05 | 1.000 | conc |
| 158 | o65  | 2.567570E-05 | 1.000 | conc |
| 159 | o66  | 3.036650E-05 | 1.000 | conc |
| 160 | o67  | 3.434180E-05 | 1.000 | conc |
| 161 | o68  | 3.721140E-05 | 1.000 | conc |
| 162 | o69  | 3.871450E-05 | 1.000 | conc |
| 163 | o70  | 3.889650E-05 | 1.000 | conc |
| 164 | o71  | 3.799760E-05 | 1.000 | conc |
| 165 | o72  | 3.684470E-05 | 1.000 | conc |
| 166 | o73  | 3.620540E-05 | 1.000 | conc |
| 167 | o74  | 3.552260E-05 | 1.000 | conc |
| 168 | o75  | 3.381830E-05 | 1.000 | conc |
| 169 | o76  | 3.141060E-05 | 1.000 | conc |
| 170 | o77  | 2.941670E-05 | 1.000 | conc |
| 171 | o78  | 2.819400E-05 | 1.000 | conc |
| 172 | o79  | 2.731840E-05 | 1.000 | conc |
| 173 | o80  | 2.593800E-05 | 1.000 | conc |
| 174 | o81  | 2.274050E-05 | 1.000 | conc |
| 175 | o82  | 1.876040E-05 | 1.000 | conc |
| 176 | o83  | 1.644770E-05 | 1.000 | conc |
| 177 | o84  | 1.546030E-05 | 1.000 | conc |
| 178 | o85  | 1.447720E-05 | 1.000 | conc |
| 179 | o86  | 1.325630E-05 | 1.000 | conc |
| 180 | o87  | 1.213110E-05 | 1.000 | conc |
| 181 | o88  | 1.106710E-05 | 1.000 | conc |
| 182 | o89  | 1.003450E-05 | 1.000 | conc |
| 183 | o90  | 9.242660E-06 | 1.000 | conc |
| 184 | o91  | 8.848360E-06 | 1.000 | conc |
| 185 | o92  | 8.809330E-06 | 1.000 | conc |
| 186 | o93  | 8.093760E-06 | 1.000 | conc |
| 187 | o94  | 7.046590E-06 | 1.000 | conc |
| 188 | o95  | 7.096300E-06 | 1.000 | conc |
| 189 | o96  | 6.642990E-06 | 1.000 | conc |
| 190 | o97  | 6.279300E-06 | 1.000 | conc |
| 191 | o98  | 6.008520E-06 | 1.000 | conc |
| 192 | o99  | 5.694840E-06 | 1.000 | conc |
| 193 | o100 | 5.320280E-06 | 1.000 | conc |
| 194 | o101 | 4.943720E-06 | 1.000 | conc |
| 195 | o102 | 4.579720E-06 | 1.000 | conc |
| 196 | o103 | 4.272880E-06 | 1.000 | conc |
| 197 | o104 | 4.106740E-06 | 1.000 | conc |
| 198 | o105 | 3.955550E-06 | 1.000 | conc |
| 199 | o106 | 3.762510E-06 | 1.000 | conc |
| 200 | o107 | 3.487950E-06 | 1.000 | conc |
| 201 | o108 | 3.157850E-06 | 1.000 | conc |
| 202 | o109 | 3.073580E-06 | 1.000 | conc |
| 203 | o110 | 3.123350E-06 | 1.000 | conc |
| 204 | o111 | 2.972620E-06 | 1.000 | conc |
| 205 | o112 | 2.396930E-06 | 1.000 | conc |
| 206 | o113 | 2.161300E-06 | 1.000 | conc |
| 207 | o114 | 2.331570E-06 | 1.000 | conc |
| 208 | o115 | 2.195760E-06 | 1.000 | conc |
| 209 | o116 | 2.013480E-06 | 1.000 | conc |
| 210 | o117 | 1.992600E-06 | 1.000 | conc |
| 211 | o118 | 2.067110E-06 | 1.000 | conc |
| 212 | o119 | 2.024050E-06 | 1.000 | conc |
| 213 | o120 | 1.793380E-06 | 1.000 | conc |
| 214 | o121 | 1.735330E-06 | 1.000 | conc |
| 215 | o122 | 1.782960E-06 | 1.000 | conc |
| 216 | o123 | 1.637310E-06 | 1.000 | conc |
| 217 | o124 | 1.542970E-06 | 1.000 | conc |
| 218 | o125 | 1.594510E-06 | 1.000 | conc |
| 219 | o126 | 1.661020E-06 | 1.000 | conc |

|     |      |              |       |      |
|-----|------|--------------|-------|------|
| 220 | o127 | 1.640720E-06 | 1.000 | conc |
| 221 | o128 | 1.554100E-06 | 1.000 | conc |
| 222 | o129 | 1.449310E-06 | 1.000 | conc |
| 223 | o130 | 1.372540E-06 | 1.000 | conc |
| 224 | o131 | 1.335330E-06 | 1.000 | conc |
| 225 | o132 | 1.319800E-06 | 1.000 | conc |
| 226 | o133 | 1.307100E-06 | 1.000 | conc |
| 227 | o134 | 1.279690E-06 | 1.000 | conc |
| 228 | o135 | 1.235570E-06 | 1.000 | conc |
| 229 | o136 | 1.183070E-06 | 1.000 | conc |
| 230 | o137 | 1.130690E-06 | 1.000 | conc |
| 231 | o138 | 1.085970E-06 | 1.000 | conc |
| 232 | o139 | 1.054120E-06 | 1.000 | conc |
| 233 | o140 | 1.040060E-06 | 1.000 | conc |
| 234 | o141 | 1.047440E-06 | 1.000 | conc |
| 235 | o142 | 1.067610E-06 | 1.000 | conc |
| 236 | o143 | 1.084930E-06 | 1.000 | conc |
| 237 | o144 | 1.083670E-06 | 1.000 | conc |
| 238 | o145 | 1.051100E-06 | 1.000 | conc |
| 239 | o146 | 9.960480E-07 | 1.000 | conc |
| 240 | o147 | 9.367260E-07 | 1.000 | conc |
| 241 | o148 | 8.912290E-07 | 1.000 | conc |
| 242 | o149 | 8.673420E-07 | 1.000 | conc |
| 243 | o150 | 8.570490E-07 | 1.000 | conc |
| 244 | o151 | 8.509940E-07 | 1.000 | conc |
| 245 | o152 | 8.410760E-07 | 1.000 | conc |
| 246 | o153 | 8.267230E-07 | 1.000 | conc |
| 247 | o154 | 8.101600E-07 | 1.000 | conc |
| 248 | o155 | 7.936160E-07 | 1.000 | conc |
| 249 | o156 | 7.787460E-07 | 1.000 | conc |
| 250 | o157 | 7.646170E-07 | 1.000 | conc |
| 251 | o158 | 7.495700E-07 | 1.000 | conc |
| 252 | o159 | 7.320050E-07 | 1.000 | conc |
| 253 | o160 | 7.117650E-07 | 1.000 | conc |
| 254 | o161 | 6.901710E-07 | 1.000 | conc |
| 255 | o162 | 6.686150E-07 | 1.000 | conc |
| 256 | o163 | 6.488390E-07 | 1.000 | conc |
| 257 | o164 | 6.339230E-07 | 1.000 | conc |
| 258 | o165 | 6.272630E-07 | 1.000 | conc |
| 259 | o166 | 6.322520E-07 | 1.000 | conc |
| 260 | o167 | 6.483740E-07 | 1.000 | conc |
| 261 | o168 | 6.640750E-07 | 1.000 | conc |
| 262 | o169 | 6.717990E-07 | 1.000 | conc |
| 263 | o170 | 6.722490E-07 | 1.000 | conc |
| 264 | o171 | 6.667270E-07 | 1.000 | conc |
| 265 | o172 | 6.565360E-07 | 1.000 | conc |
| 266 | o173 | 6.429800E-07 | 1.000 | conc |
| 267 | o174 | 6.273620E-07 | 1.000 | conc |
| 268 | o175 | 6.109860E-07 | 1.000 | conc |
| 269 | o176 | 5.948490E-07 | 1.000 | conc |
| 270 | o177 | 5.787370E-07 | 1.000 | conc |
| 271 | o178 | 5.621310E-07 | 1.000 | conc |
| 272 | o179 | 5.445970E-07 | 1.000 | conc |
| 273 | o180 | 5.274260E-07 | 1.000 | conc |
| 274 | o181 | 5.135020E-07 | 1.000 | conc |
| 275 | o182 | 5.057720E-07 | 1.000 | conc |
| 276 | o183 | 5.056420E-07 | 1.000 | conc |
| 277 | o184 | 5.093550E-07 | 1.000 | conc |
| 278 | o185 | 5.120720E-07 | 1.000 | conc |
| 279 | o186 | 5.089570E-07 | 1.000 | conc |
| 280 | o187 | 4.979250E-07 | 1.000 | conc |
| 281 | o188 | 4.838970E-07 | 1.000 | conc |
| 282 | o189 | 4.728920E-07 | 1.000 | conc |
| 283 | o190 | 4.702190E-07 | 1.000 | conc |
| 284 | o191 | 4.733380E-07 | 1.000 | conc |
| 285 | o192 | 4.748510E-07 | 1.000 | conc |
| 286 | o193 | 4.673070E-07 | 1.000 | conc |
| 287 | o194 | 4.478510E-07 | 1.000 | conc |
| 288 | o195 | 4.235710E-07 | 1.000 | conc |
| 289 | o196 | 4.028560E-07 | 1.000 | conc |
| 290 | o197 | 3.940200E-07 | 1.000 | conc |
| 291 | o198 | 3.997040E-07 | 1.000 | conc |
| 292 | o199 | 4.130600E-07 | 1.000 | conc |

|     |      |              |       |      |
|-----|------|--------------|-------|------|
| 293 | o200 | 4.263430E-07 | 1.000 | conc |
| 294 | o201 | 4.326460E-07 | 1.000 | conc |
| 295 | o202 | 4.306550E-07 | 1.000 | conc |
| 296 | o203 | 4.213290E-07 | 1.000 | conc |
| 297 | o204 | 4.056960E-07 | 1.000 | conc |
| 298 | o205 | 3.878020E-07 | 1.000 | conc |
| 299 | o206 | 3.760210E-07 | 1.000 | conc |
| 300 | o207 | 3.790600E-07 | 1.000 | conc |
| 301 | o208 | 4.048110E-07 | 1.000 | conc |
| 302 | o209 | 4.380700E-07 | 1.000 | conc |
| 303 | o210 | 4.505410E-07 | 1.000 | conc |
| 304 | o211 | 4.448250E-07 | 1.000 | conc |
| 305 | o212 | 4.285460E-07 | 1.000 | conc |
| 306 | o213 | 4.093090E-07 | 1.000 | conc |
| 307 | o214 | 3.923830E-07 | 1.000 | conc |
| 308 | o215 | 3.785030E-07 | 1.000 | conc |
| 309 | o216 | 3.678840E-07 | 1.000 | conc |
| 310 | o217 | 3.606130E-07 | 1.000 | conc |
| 311 | o218 | 3.557500E-07 | 1.000 | conc |
| 312 | o219 | 3.518660E-07 | 1.000 | conc |
| 313 | o220 | 3.475430E-07 | 1.000 | conc |
| 314 | o221 | 3.421740E-07 | 1.000 | conc |
| 315 | o222 | 3.365050E-07 | 1.000 | conc |
| 316 | o223 | 3.314100E-07 | 1.000 | conc |
| 317 | o224 | 3.277660E-07 | 1.000 | conc |
| 318 | o225 | 3.266420E-07 | 1.000 | conc |
| 319 | o226 | 3.293540E-07 | 1.000 | conc |
| 320 | o227 | 3.372350E-07 | 1.000 | conc |
| 321 | o228 | 3.503730E-07 | 1.000 | conc |
| 322 | o229 | 3.627350E-07 | 1.000 | conc |
| 323 | o230 | 3.664120E-07 | 1.000 | conc |
| 324 | o231 | 3.538240E-07 | 1.000 | conc |
| 325 | o232 | 3.267250E-07 | 1.000 | conc |
| 326 | o233 | 2.972220E-07 | 1.000 | conc |
| 327 | o234 | 2.779620E-07 | 1.000 | conc |
| 328 | o235 | 2.807770E-07 | 1.000 | conc |
| 329 | o236 | 3.027670E-07 | 1.000 | conc |
| 330 | o237 | 3.282720E-07 | 1.000 | conc |
| 331 | o238 | 3.412080E-07 | 1.000 | conc |
| 332 | o239 | 3.313560E-07 | 1.000 | conc |
| 333 | o240 | 3.067770E-07 | 1.000 | conc |
| 334 | o241 | 2.790880E-07 | 1.000 | conc |
| 335 | o242 | 2.593120E-07 | 1.000 | conc |
| 336 | o243 | 2.500270E-07 | 1.000 | conc |
| 337 | o244 | 2.475120E-07 | 1.000 | conc |
| 338 | o245 | 2.478980E-07 | 1.000 | conc |
| 339 | o246 | 2.476030E-07 | 1.000 | conc |
| 340 | o247 | 2.459700E-07 | 1.000 | conc |
| 341 | o248 | 2.440310E-07 | 1.000 | conc |
| 342 | o249 | 2.428400E-07 | 1.000 | conc |
| 343 | o250 | 2.429470E-07 | 1.000 | conc |
| 344 | o251 | 2.438980E-07 | 1.000 | conc |
| 345 | o252 | 2.451130E-07 | 1.000 | conc |
| 346 | o253 | 2.460160E-07 | 1.000 | conc |
| 347 | o254 | 2.460300E-07 | 1.000 | conc |
| 348 | o255 | 2.445760E-07 | 1.000 | conc |
| 349 | o256 | 2.410770E-07 | 1.000 | conc |
| 350 | o257 | 2.349560E-07 | 1.000 | conc |
| 351 | o258 | 2.256350E-07 | 1.000 | conc |
| 352 | o259 | 2.127040E-07 | 1.000 | conc |
| 353 | o260 | 1.975550E-07 | 1.000 | conc |
| 354 | o261 | 1.826670E-07 | 1.000 | conc |
| 355 | o262 | 1.705390E-07 | 1.000 | conc |
| 356 | o263 | 1.636690E-07 | 1.000 | conc |
| 357 | o264 | 1.644490E-07 | 1.000 | conc |
| 358 | o265 | 1.726930E-07 | 1.000 | conc |
| 359 | o266 | 1.855120E-07 | 1.000 | conc |
| 360 | o267 | 1.998920E-07 | 1.000 | conc |
| 361 | o268 | 2.128170E-07 | 1.000 | conc |
| 362 | o269 | 2.212710E-07 | 1.000 | conc |
| 363 | o270 | 2.227080E-07 | 1.000 | conc |
| 364 | o271 | 2.176220E-07 | 1.000 | conc |
| 365 | o272 | 2.077180E-07 | 1.000 | conc |

|     |      |              |       |      |
|-----|------|--------------|-------|------|
| 366 | o273 | 1.947020E-07 | 1.000 | conc |
| 367 | o274 | 1.802810E-07 | 1.000 | conc |
| 368 | o275 | 1.661270E-07 | 1.000 | conc |
| 369 | o276 | 1.534240E-07 | 1.000 | conc |
| 370 | o277 | 1.430190E-07 | 1.000 | conc |
| 371 | o278 | 1.357500E-07 | 1.000 | conc |
| 372 | o279 | 1.324550E-07 | 1.000 | conc |
| 373 | o280 | 1.339740E-07 | 1.000 | conc |
| 374 | o281 | 1.405780E-07 | 1.000 | conc |
| 375 | o282 | 1.502300E-07 | 1.000 | conc |
| 376 | o283 | 1.603050E-07 | 1.000 | conc |
| 377 | o284 | 1.681780E-07 | 1.000 | conc |
| 378 | o285 | 1.712250E-07 | 1.000 | conc |
| 379 | o286 | 1.672560E-07 | 1.000 | conc |
| 380 | o287 | 1.574450E-07 | 1.000 | conc |
| 381 | o288 | 1.445270E-07 | 1.000 | conc |
| 382 | o289 | 1.312480E-07 | 1.000 | conc |
| 383 | o290 | 1.203520E-07 | 1.000 | conc |
| 384 | o291 | 1.145800E-07 | 1.000 | conc |
| 385 | o292 | 1.155330E-07 | 1.000 | conc |
| 386 | o293 | 1.218370E-07 | 1.000 | conc |
| 387 | o294 | 1.316430E-07 | 1.000 | conc |
| 388 | o295 | 1.431010E-07 | 1.000 | conc |
| 389 | o296 | 1.543620E-07 | 1.000 | conc |
| 390 | o297 | 1.637930E-07 | 1.000 | conc |
| 391 | o298 | 1.708000E-07 | 1.000 | conc |
| 392 | o299 | 1.751040E-07 | 1.000 | conc |
| 393 | o300 | 1.764210E-07 | 1.000 | conc |
| 394 | o301 | 1.744710E-07 | 1.000 | conc |
| 395 | o302 | 1.689780E-07 | 1.000 | conc |
| 396 | o303 | 1.601270E-07 | 1.000 | conc |
| 397 | o304 | 1.488840E-07 | 1.000 | conc |
| 398 | o305 | 1.362920E-07 | 1.000 | conc |
| 399 | o306 | 1.233950E-07 | 1.000 | conc |
| 400 | o307 | 1.112360E-07 | 1.000 | conc |
| 401 | o308 | 1.008570E-07 | 1.000 | conc |
| 402 | o309 | 9.328990E-08 | 1.000 | conc |
| 403 | o310 | 8.893630E-08 | 1.000 | conc |
| 404 | o311 | 8.728010E-08 | 1.000 | conc |
| 405 | o312 | 8.773220E-08 | 1.000 | conc |
| 406 | o313 | 8.970370E-08 | 1.000 | conc |
| 407 | o314 | 9.260560E-08 | 1.000 | conc |
| 408 | o315 | 9.584880E-08 | 1.000 | conc |
| 409 | o316 | 9.884430E-08 | 1.000 | conc |
| 410 | o317 | 1.011340E-07 | 1.000 | conc |
| 411 | o318 | 1.028180E-07 | 1.000 | conc |
| 412 | o319 | 1.041430E-07 | 1.000 | conc |
| 413 | o320 | 1.053590E-07 | 1.000 | conc |
| 414 | o321 | 1.067130E-07 | 1.000 | conc |
| 415 | o322 | 1.084520E-07 | 1.000 | conc |
| 416 | o323 | 1.108260E-07 | 1.000 | conc |
| 417 | o324 | 1.140510E-07 | 1.000 | conc |
| 418 | o325 | 1.178980E-07 | 1.000 | conc |
| 419 | o326 | 1.217920E-07 | 1.000 | conc |
| 420 | o327 | 1.251530E-07 | 1.000 | conc |
| 421 | o328 | 1.273980E-07 | 1.000 | conc |
| 422 | o329 | 1.279450E-07 | 1.000 | conc |
| 423 | o330 | 1.262120E-07 | 1.000 | conc |
| 424 | o331 | 1.216930E-07 | 1.000 | conc |
| 425 | o332 | 1.147900E-07 | 1.000 | conc |
| 426 | o333 | 1.064960E-07 | 1.000 | conc |
| 427 | o334 | 9.781810E-08 | 1.000 | conc |
| 428 | o335 | 8.976220E-08 | 1.000 | conc |
| 429 | o336 | 8.333400E-08 | 1.000 | conc |
| 430 | o337 | 7.953930E-08 | 1.000 | conc |
| 431 | o338 | 7.937580E-08 | 1.000 | conc |
| 432 | o339 | 8.310890E-08 | 1.000 | conc |
| 433 | o340 | 8.970640E-08 | 1.000 | conc |
| 434 | o341 | 9.800290E-08 | 1.000 | conc |
| 435 | o342 | 1.068330E-07 | 1.000 | conc |
| 436 | o343 | 1.150320E-07 | 1.000 | conc |
| 437 | o344 | 1.214330E-07 | 1.000 | conc |
| 438 | o345 | 1.248720E-07 | 1.000 | conc |

|     |      |              |       |      |
|-----|------|--------------|-------|------|
| 439 | o346 | 1.244490E-07 | 1.000 | conc |
| 440 | o347 | 1.206740E-07 | 1.000 | conc |
| 441 | o348 | 1.145190E-07 | 1.000 | conc |
| 442 | o349 | 1.069590E-07 | 1.000 | conc |
| 443 | o350 | 9.896780E-08 | 1.000 | conc |
| 444 | o351 | 9.151880E-08 | 1.000 | conc |
| 445 | o352 | 8.558610E-08 | 1.000 | conc |
| 446 | o353 | 8.210600E-08 | 1.000 | conc |
| 447 | o354 | 8.126640E-08 | 1.000 | conc |
| 448 | o355 | 8.256360E-08 | 1.000 | conc |
| 449 | o356 | 8.546820E-08 | 1.000 | conc |
| 450 | o357 | 8.945030E-08 | 1.000 | conc |
| 451 | o358 | 9.398060E-08 | 1.000 | conc |
| 452 | o359 | 9.852930E-08 | 1.000 | conc |
| 453 | o360 | 1.025670E-07 | 1.000 | conc |
| 454 | o361 | 1.056860E-07 | 1.000 | conc |
| 455 | o362 | 1.077830E-07 | 1.000 | conc |
| 456 | o363 | 1.088070E-07 | 1.000 | conc |
| 457 | o364 | 1.087020E-07 | 1.000 | conc |
| 458 | o365 | 1.074160E-07 | 1.000 | conc |
| 459 | o366 | 1.048950E-07 | 1.000 | conc |
| 460 | o367 | 1.010860E-07 | 1.000 | conc |
| 461 | o368 | 9.611800E-08 | 1.000 | conc |
| 462 | o369 | 9.050930E-08 | 1.000 | conc |
| 463 | o370 | 8.482960E-08 | 1.000 | conc |
| 464 | o371 | 7.964840E-08 | 1.000 | conc |
| 465 | o372 | 7.553540E-08 | 1.000 | conc |
| 466 | o373 | 7.306010E-08 | 1.000 | conc |
| 467 | o374 | 7.279220E-08 | 1.000 | conc |
| 468 | o375 | 7.514010E-08 | 1.000 | conc |
| 469 | o376 | 7.944540E-08 | 1.000 | conc |
| 470 | o377 | 8.461630E-08 | 1.000 | conc |
| 471 | o378 | 8.955980E-08 | 1.000 | conc |
| 472 | o379 | 9.318290E-08 | 1.000 | conc |
| 473 | o380 | 9.439240E-08 | 1.000 | conc |
| 474 | o381 | 9.209550E-08 | 1.000 | conc |
| 475 | o382 | 8.524380E-08 | 1.000 | conc |
| 476 | o383 | 7.405490E-08 | 1.000 | conc |
| 477 | o384 | 6.015780E-08 | 1.000 | conc |
| 478 | o385 | 4.525560E-08 | 1.000 | conc |
| 479 | o386 | 3.105130E-08 | 1.000 | conc |
| 480 | o387 | 1.924800E-08 | 1.000 | conc |
| 481 | o388 | 1.154880E-08 | 1.000 | conc |
| 482 | o389 | 9.269960E-09 | 1.000 | conc |
| 483 | o390 | 1.192830E-08 | 1.000 | conc |
| 484 | o391 | 1.851730E-08 | 1.000 | conc |
| 485 | o392 | 2.803040E-08 | 1.000 | conc |
| 486 | o393 | 3.946100E-08 | 1.000 | conc |
| 487 | o394 | 5.180260E-08 | 1.000 | conc |
| 488 | o395 | 6.404870E-08 | 1.000 | conc |
| 489 | o396 | 7.522440E-08 | 1.000 | conc |
| 490 | o397 | 8.488610E-08 | 1.000 | conc |
| 491 | o398 | 9.302900E-08 | 1.000 | conc |
| 492 | o399 | 9.966150E-08 | 1.000 | conc |
| 493 | o400 | 1.047920E-07 | 1.000 | conc |
| 494 | o401 | 1.084280E-07 | 1.000 | conc |
| 495 | o402 | 1.105790E-07 | 1.000 | conc |
| 496 | o403 | 1.112630E-07 | 1.000 | conc |
| 497 | o404 | 1.106210E-07 | 1.000 | conc |
| 498 | o405 | 1.088860E-07 | 1.000 | conc |
| 499 | o406 | 1.062910E-07 | 1.000 | conc |
| 500 | o407 | 1.030690E-07 | 1.000 | conc |
| 501 | o408 | 9.945440E-08 | 1.000 | conc |
| 502 | o409 | 9.568040E-08 | 1.000 | conc |
| 503 | o410 | 9.197960E-08 | 1.000 | conc |
| 504 | o411 | 8.849010E-08 | 1.000 | conc |
| 505 | o412 | 8.516850E-08 | 1.000 | conc |
| 506 | o413 | 8.195060E-08 | 1.000 | conc |
| 507 | o414 | 7.877250E-08 | 1.000 | conc |
| 508 | o415 | 7.557000E-08 | 1.000 | conc |
| 509 | o416 | 7.227910E-08 | 1.000 | conc |
| 510 | o417 | 6.883580E-08 | 1.000 | conc |
| 511 | o418 | 6.520510E-08 | 1.000 | conc |

|     |      |              |       |      |
|-----|------|--------------|-------|------|
| 512 | o419 | 6.152120E-08 | 1.000 | conc |
| 513 | o420 | 5.797910E-08 | 1.000 | conc |
| 514 | o421 | 5.477390E-08 | 1.000 | conc |
| 515 | o422 | 5.210060E-08 | 1.000 | conc |
| 516 | o423 | 5.015430E-08 | 1.000 | conc |
| 517 | o424 | 4.913010E-08 | 1.000 | conc |
| 518 | o425 | 4.914850E-08 | 1.000 | conc |
| 519 | o426 | 4.996780E-08 | 1.000 | conc |
| 520 | o427 | 5.123580E-08 | 1.000 | conc |
| 521 | o428 | 5.260070E-08 | 1.000 | conc |
| 522 | o429 | 5.372650E-08 | 1.000 | conc |
| 523 | o430 | 5.452150E-08 | 1.000 | conc |
| 524 | o431 | 5.508430E-08 | 1.000 | conc |
| 525 | o432 | 5.551840E-08 | 1.000 | conc |
| 526 | o433 | 5.592730E-08 | 1.000 | conc |
| 527 | o434 | 5.641470E-08 | 1.000 | conc |
| 528 | o435 | 5.708410E-08 | 1.000 | conc |
| 529 | o436 | 5.803860E-08 | 1.000 | conc |
| 530 | o437 | 5.931950E-08 | 1.000 | conc |
| 531 | o438 | 6.083730E-08 | 1.000 | conc |
| 532 | o439 | 6.248570E-08 | 1.000 | conc |
| 533 | o440 | 6.415840E-08 | 1.000 | conc |
| 534 | o441 | 6.574900E-08 | 1.000 | conc |
| 535 | o442 | 6.715150E-08 | 1.000 | conc |
| 536 | o443 | 6.825940E-08 | 1.000 | conc |
| 537 | o444 | 6.897850E-08 | 1.000 | conc |
| 538 | o445 | 6.929210E-08 | 1.000 | conc |
| 539 | o446 | 6.921410E-08 | 1.000 | conc |
| 540 | o447 | 6.875870E-08 | 1.000 | conc |
| 541 | o448 | 6.793980E-08 | 1.000 | conc |
| 542 | o449 | 6.677160E-08 | 1.000 | conc |
| 543 | o450 | 6.526820E-08 | 1.000 | conc |
| 544 | o451 | 6.346600E-08 | 1.000 | conc |
| 545 | o452 | 6.152200E-08 | 1.000 | conc |
| 546 | o453 | 5.963400E-08 | 1.000 | conc |
| 547 | o454 | 5.799960E-08 | 1.000 | conc |
| 548 | o455 | 5.681660E-08 | 1.000 | conc |
| 549 | o456 | 5.628270E-08 | 1.000 | conc |
| 550 | o457 | 5.659560E-08 | 1.000 | conc |
| 551 | o458 | 5.793820E-08 | 1.000 | conc |
| 552 | o459 | 6.018830E-08 | 1.000 | conc |
| 553 | o460 | 6.293640E-08 | 1.000 | conc |
| 554 | o461 | 6.576190E-08 | 1.000 | conc |
| 555 | o462 | 6.824420E-08 | 1.000 | conc |
| 556 | o463 | 6.996260E-08 | 1.000 | conc |
| 557 | o464 | 7.049670E-08 | 1.000 | conc |
| 558 | o465 | 6.942630E-08 | 1.000 | conc |
| 559 | o466 | 6.658270E-08 | 1.000 | conc |
| 560 | o467 | 6.244930E-08 | 1.000 | conc |
| 561 | o468 | 5.761370E-08 | 1.000 | conc |
| 562 | o469 | 5.266350E-08 | 1.000 | conc |
| 563 | o470 | 4.818620E-08 | 1.000 | conc |
| 564 | o471 | 4.476960E-08 | 1.000 | conc |
| 565 | o472 | 4.300000E-08 | 1.000 | conc |
| 566 | o473 | 4.321500E-08 | 1.000 | conc |
| 567 | o474 | 4.520450E-08 | 1.000 | conc |
| 568 | o475 | 4.868480E-08 | 1.000 | conc |
| 569 | o476 | 5.337270E-08 | 1.000 | conc |
| 570 | o477 | 5.898460E-08 | 1.000 | conc |
| 571 | o478 | 6.523700E-08 | 1.000 | conc |
| 572 | o479 | 7.184670E-08 | 1.000 | conc |
| 573 | o480 | 7.851040E-08 | 1.000 | conc |
| 574 | o481 | 8.479280E-08 | 1.000 | conc |
| 575 | o482 | 9.020340E-08 | 1.000 | conc |
| 576 | o483 | 9.425170E-08 | 1.000 | conc |
| 577 | o484 | 9.644720E-08 | 1.000 | conc |
| 578 | o485 | 9.629920E-08 | 1.000 | conc |
| 579 | o486 | 9.331730E-08 | 1.000 | conc |
| 580 | o487 | 8.703580E-08 | 1.000 | conc |
| 581 | o488 | 7.771540E-08 | 1.000 | conc |
| 582 | o489 | 6.644230E-08 | 1.000 | conc |
| 583 | o490 | 5.434720E-08 | 1.000 | conc |
| 584 | o491 | 4.256060E-08 | 1.000 | conc |



|     |      |              |       |      |
|-----|------|--------------|-------|------|
| 585 | o492 | 3.221320E-08 | 1.000 | conc |
| 586 | o493 | 2.443570E-08 | 1.000 | conc |
| 587 | o494 | 2.032130E-08 | 1.000 | conc |
| 588 | o495 | 2.013560E-08 | 1.000 | conc |
| 589 | o496 | 2.333550E-08 | 1.000 | conc |
| 590 | o497 | 2.934400E-08 | 1.000 | conc |
| 591 | o498 | 3.758420E-08 | 1.000 | conc |
| 592 | o499 | 4.747890E-08 | 1.000 | conc |
| 593 | o500 | 5.845140E-08 | 1.000 | conc |

594  
595

596 Control settings:-

597  
598 Initial lambda : 10.000  
599 Lambda adjustment factor : 2.0000  
600 Sufficient new/old phi ratio per optimisation iteration : 0.30000  
601 Limiting relative phi reduction between lambdas : 1.00000E-02  
602 Maximum trial lambdas per iteration : 8  
603 Forgive model run failure during lamda testing : yes  
604 Forgive model run failure during Jacobian runs : yes  
605  
606 Perform Broyden's update of Jacobian matrix : no  
607 Undertake observation re-referencing : no  
608  
609 Maximum factor parameter change (factor-limited changes) : 10.000  
610 Maximum relative parameter change (relative-limited changes) : na  
611 Fraction of initial parameter values used in computing  
612 change limit for near-zero parameters : 1.00000E-03  
613 Allow bending of parameter upgrade vector : no  
614 Allow parameters to stick to their bounds : no  
615  
616 Relative phi reduction below which to begin use of  
617 central derivatives : 0.10000  
618 Iteration at which to first consider derivatives switch : 1  
619  
620 Relative phi reduction indicating convergence : 0.50000E-02  
621 Number of phi values required within this range : 4  
622 Maximum number of consecutive failures to lower phi : 4  
623 Minimal relative parameter change indicating convergence : 0.50000E-02  
624 Number of consecutive iterations with minimal param change : 4  
625 Maximum number of optimisation iterations : 200  
626  
627 Attempt automatic user intervention : no  
628  
629 Attempt reuse of parameter sensitivities : no  
630  
631 Scale parameters by their bounds : yes  
632

633  
634 File saving options: -  
635

636 Save best JCO file : yes  
637 Save multiple JCO files : no  
638 Save multiple REI files : no  
639 Save multiple PAR files : yes  
640

641  
642 OPTIMISATION RECORD  
643

644  
645 INITIAL CONDITIONS:  
646 Sum of squared weighted residuals (ie phi) = 3.40630E-09  
647

648 Current parameter values  
649 h1 40.0000  
650 s1 250.000  
651 p1 0.900000  
652 o1 1.000000E-05  
653

654  
655 OPTIMISATION ITERATION NO. : 1  
656 Model calls so far : 1  
657 Derivative model calls so far : 0

```

658 Starting phi for this iteration: 3.40630E-09
659
660 Lambda = 10.000 ----->
661 Phi = 3.25120E-09 ( 0.954 of starting phi)
662
663 Lambda = 5.0000 ----->
664 Phi = 3.25120E-09 ( 0.954 of starting phi)
665
666 No more lambdas: relative phi reduction between lambdas less than 0.0100
667 Lowest phi this iteration: 3.25120E-09
668 Relative phi reduction between optimisation iterations less than 0.1000
669 Switch to higher order derivatives calculation
670
671 Current parameter values Previous parameter values
672 h1 39.7726 h1 40.0000
673 s1 243.318 s1 250.000
674 p1 0.899875 p1 0.900000
675 o1 1.004959E-05 o1 1.000000E-05
676 Maximum factor change: 1.027 ["s1"]
677 Maximum relative change: 2.6727E-02 ["s1"]
678
679
680 OPTIMISATION ITERATION NO. : 2
681 Model calls so far : 5
682 Derivative model calls so far : 1
683 Starting phi for this iteration: 3.25120E-09
684
685 Lambda = 5.0000 ----->
686 Phi = 2.94127E-09 ( 0.905 of starting phi)
687
688 Lambda = 2.5000 ----->
689 Phi = 2.94127E-09 ( 0.905 of starting phi)
690
691 No more lambdas: relative phi reduction between lambdas less than 0.0100
692 Lowest phi this iteration: 2.94127E-09
693
694 Current parameter values Previous parameter values
695 h1 39.4163 h1 39.7726
696 s1 222.592 s1 243.318
697 p1 0.899693 p1 0.899875
698 o1 1.018809E-05 o1 1.004959E-05
699 Maximum factor change: 1.093 ["s1"]
700 Maximum relative change: 8.5183E-02 ["s1"]
701
702
703 OPTIMISATION ITERATION NO. : 3
704 Model calls so far : 11
705 Derivative model calls so far : 2
706 Starting phi for this iteration: 2.94127E-09
707
708 Lambda = 2.5000 ----->
709 Phi = 2.79694E-09 ( 0.951 of starting phi)
710
711 Lambda = 1.2500 ----->
712 Phi = 2.79694E-09 ( 0.951 of starting phi)
713
714 No more lambdas: relative phi reduction between lambdas less than 0.0100
715 Lowest phi this iteration: 2.79694E-09
716
717 Current parameter values Previous parameter values
718 h1 39.1908 h1 39.4163
719 s1 205.050 s1 222.592
720 p1 0.899564 p1 0.899693
721 o1 1.033842E-05 o1 1.018809E-05
722 Maximum factor change: 1.086 ["s1"]
723 Maximum relative change: 7.8805E-02 ["s1"]
724
725
726 OPTIMISATION ITERATION NO. : 4
727 Model calls so far : 17
728 Derivative model calls so far : 3
729 Starting phi for this iteration: 2.79694E-09
730

```

```

731      Lambda = 0.62500      ----->
732      Phi = 2.70642E-09 ( 0.968 of starting phi)
733
734      Lambda = 0.31250      ----->
735      Phi = 2.70642E-09 ( 0.968 of starting phi)
736
737      Lambda = 1.2500      ----->
738      Phi = 2.70642E-09 ( 0.968 of starting phi)
739
740      No more lambdas: phi rising
741      Lowest phi this iteration: 2.70642E-09
742
743      Current parameter values      Previous parameter values
744      h1      39.0354      h1      39.1908
745      s1      189.361      s1      205.050
746      p1      0.899465      p1      0.899564
747      o1      1.050122E-05      o1      1.033842E-05
748      Maximum factor change: 1.083      ["s1"]
749      Maximum relative change: 7.6514E-02      ["s1"]
750
751
752      OPTIMISATION ITERATION NO.      : 5
753      Model calls so far      : 24
754      Derivative model calls so far      : 4
755      Starting phi for this iteration: 2.70642E-09
756
757      Lambda = 0.62500      ----->
758      Phi = 2.64770E-09 ( 0.978 of starting phi)
759
760      Lambda = 0.31250      ----->
761      Phi = 2.64770E-09 ( 0.978 of starting phi)
762
763      No more lambdas: relative phi reduction between lambdas less than 0.0100
764      Lowest phi this iteration: 2.64770E-09
765
766      Current parameter values      Previous parameter values
767      h1      38.9299      h1      39.0354
768      s1      176.071      s1      189.361
769      p1      0.899390      p1      0.899465
770      o1      1.066639E-05      o1      1.050122E-05
771      Maximum factor change: 1.075      ["s1"]
772      Maximum relative change: 7.0184E-02      ["s1"]
773
774
775      OPTIMISATION ITERATION NO.      : 6
776      Model calls so far      : 30
777      Derivative model calls so far      : 5
778      Starting phi for this iteration: 2.64770E-09
779
780      Lambda = 0.15625      ----->
781      Phi = 2.61368E-09 ( 0.987 of starting phi)
782
783      Lambda = 7.81250E-02 ----->
784      Phi = 2.61368E-09 ( 0.987 of starting phi)
785
786      Lambda = 0.31250      ----->
787      Phi = 2.61368E-09 ( 0.987 of starting phi)
788
789      No more lambdas: phi rising
790      Lowest phi this iteration: 2.61368E-09
791
792      Current parameter values      Previous parameter values
793      h1      38.8622      h1      38.9299
794      s1      165.857      s1      176.071
795      p1      0.899335      p1      0.899390
796      o1      1.082255E-05      o1      1.066639E-05
797      Maximum factor change: 1.062      ["s1"]
798      Maximum relative change: 5.8011E-02      ["s1"]
799
800
801      OPTIMISATION ITERATION NO.      : 7
802      Model calls so far      : 37
803      Derivative model calls so far      : 6

```

```

804 Starting phi for this iteration: 2.61368E-09
805
806 Lambda = 0.15625 ----->
807 Phi = 2.59279E-09 ( 0.992 of starting phi)
808
809 Lambda = 7.81250E-02 ----->
810 Phi = 2.59279E-09 ( 0.992 of starting phi)
811
812 No more lambdas: relative phi reduction between lambdas less than 0.0100
813 Lowest phi this iteration: 2.59279E-09
814
815 Current parameter values Previous parameter values
816 h1 38.8174 h1 38.8622
817 s1 157.901 s1 165.857
818 p1 0.899292 p1 0.899335
819 o1 1.098669E-05 o1 1.082255E-05
820 Maximum factor change: 1.050 ["s1"]
821 Maximum relative change: 4.7970E-02 ["s1"]
822
823
824 OPTIMISATION ITERATION NO. : 8
825 Model calls so far : 43
826 Derivative model calls so far : 7
827 Starting phi for this iteration: 2.59279E-09
828
829 Lambda = 3.90625E-02 ----->
830 Phi = 2.53940E-09 ( 0.979 of starting phi)
831
832 Lambda = 1.95313E-02 ----->
833 Phi = 2.53938E-09 ( 0.979 of starting phi)
834
835 No more lambdas: relative phi reduction between lambdas less than 0.0100
836 Lowest phi this iteration: 2.53938E-09
837
838 Current parameter values Previous parameter values
839 h1 38.7740 h1 38.8174
840 s1 145.344 s1 157.901
841 p1 0.899212 p1 0.899292
842 o1 1.157940E-05 o1 1.098669E-05
843 Maximum factor change: 1.086 ["s1"]
844 Maximum relative change: 7.9522E-02 ["s1"]
845
846
847 OPTIMISATION ITERATION NO. : 9
848 Model calls so far : 49
849 Derivative model calls so far : 8
850 Starting phi for this iteration: 2.53938E-09
851
852 Lambda = 9.76563E-03 ----->
853 Phi = 2.52278E-09 ( 0.993 of starting phi)
854
855 Lambda = 4.88281E-03 ----->
856 Phi = 2.52277E-09 ( 0.993 of starting phi)
857
858 No more lambdas: relative phi reduction between lambdas less than 0.0100
859 Lowest phi this iteration: 2.52277E-09
860
861 Current parameter values Previous parameter values
862 h1 38.8043 h1 38.7740
863 s1 150.296 s1 145.344
864 p1 0.899237 p1 0.899212
865 o1 1.156153E-05 o1 1.157940E-05
866 Maximum factor change: 1.034 ["s1"]
867 Maximum relative change: 3.4066E-02 ["s1"]
868
869
870 OPTIMISATION ITERATION NO. : 10
871 Model calls so far : 55
872 Derivative model calls so far : 9
873 Starting phi for this iteration: 2.52277E-09
874
875 Lambda = 2.44141E-03 ----->
876 Phi = 2.49515E-09 ( 0.989 of starting phi)

```

```

877
878     Lambda = 1.22070E-03 ----->
879     Phi = 2.49501E-09 ( 0.989 of starting phi)
880
881 No more lambdas: relative phi reduction between lambdas less than 0.0100
882 Lowest phi this iteration: 2.49501E-09
883
884     Current parameter values           Previous parameter values
885     h1              38.8655             h1              38.8043
886     s1              158.969             s1              150.296
887     p1              0.899274            p1              0.899237
888     o1              1.164314E-05        o1              1.156153E-05
889 Maximum factor change: 1.058 ["s1"]
890 Maximum relative change: 5.7707E-02 ["s1"]
891
892
893 OPTIMISATION ITERATION NO.           : 11
894 Model calls so far                   : 61
895 Derivative model calls so far       : 10
896 Starting phi for this iteration: 2.49501E-09
897
898     Lambda = 6.10352E-04 ----->
899     Phi = 2.47730E-09 ( 0.993 of starting phi)
900
901     Lambda = 3.05176E-04 ----->
902     Phi = 2.47707E-09 ( 0.993 of starting phi)
903
904 No more lambdas: relative phi reduction between lambdas less than 0.0100
905 Lowest phi this iteration: 2.47707E-09
906
907     Current parameter values           Previous parameter values
908     h1              38.8467             h1              38.8655
909     s1              154.572             s1              158.969
910     p1              0.899245            p1              0.899274
911     o1              1.181276E-05        o1              1.164314E-05
912 Maximum factor change: 1.028 ["s1"]
913 Maximum relative change: 2.7662E-02 ["s1"]
914
915
916 OPTIMISATION ITERATION NO.           : 12
917 Model calls so far                   : 67
918 Derivative model calls so far       : 11
919 Starting phi for this iteration: 2.47707E-09
920
921     Lambda = 1.52588E-04 ----->
922     Phi = 3.61906E-10 ( 0.146 of starting phi)
923
924 No more lambdas: phi is less than 0.3000 of starting phi
925 Lowest phi this iteration: 3.61906E-10
926
927     Current parameter values           Previous parameter values
928     h1              40.3253             h1              38.8467
929     s1              140.675             s1              154.572
930     p1              0.898122            p1              0.899245
931     o1              8.452134E-05        o1              1.181276E-05
932 Maximum factor change: 7.155 ["o1"]
933 Maximum relative change: 6.155 ["o1"]
934
935
936 OPTIMISATION ITERATION NO.           : 13
937 Model calls so far                   : 72
938 Derivative model calls so far       : 12
939 Starting phi for this iteration: 3.61906E-10
940
941     Lambda = 7.62939E-05 ----->
942     Phi = 3.38172E-10 ( 0.934 of starting phi)
943
944     Lambda = 3.81470E-05 ----->
945     Phi = 3.38165E-10 ( 0.934 of starting phi)
946
947 No more lambdas: relative phi reduction between lambdas less than 0.0100
948 Lowest phi this iteration: 3.38165E-10
949

```

```

950      Current parameter values                Previous parameter values
951      h1                40.3008                h1                40.3253
952      s1                147.929                s1                140.675
953      p1                0.899294                p1                0.898122
954      o1                7.705132E-05                o1                8.452134E-05
955      Maximum factor change: 1.097 ["o1"]
956      Maximum relative change: 8.8380E-02 ["o1"]
957
958
959      OPTIMISATION ITERATION NO.                : 14
960      Model calls so far                : 78
961      Derivative model calls so far      : 13
962      Starting phi for this iteration: 3.38165E-10
963
964      Lambda = 1.90735E-05 ----->
965      Phi = 3.37717E-10 ( 0.999 of starting phi)
966
967      Lambda = 9.53674E-06 ----->
968      Phi = 3.37654E-10 ( 0.998 of starting phi)
969
970      No more lambdas: relative phi reduction between lambdas less than 0.0100
971      Lowest phi this iteration: 3.37654E-10
972
973      Current parameter values                Previous parameter values
974      h1                40.2981                h1                40.3008
975      s1                149.204                s1                147.929
976      p1                0.899070                p1                0.899294
977      o1                7.614777E-05                o1                7.705132E-05
978      Maximum factor change: 1.012 ["o1"]
979      Maximum relative change: 1.1727E-02 ["o1"]
980
981
982      OPTIMISATION ITERATION NO.                : 15
983      Model calls so far                : 84
984      Derivative model calls so far      : 14
985      Starting phi for this iteration: 3.37654E-10
986
987      Lambda = 4.76837E-06 ----->
988      Phi = 3.37204E-10 ( 0.999 of starting phi)
989
990      Lambda = 2.38419E-06 ----->
991      Phi = 3.37051E-10 ( 0.998 of starting phi)
992
993      No more lambdas: relative phi reduction between lambdas less than 0.0100
994      Lowest phi this iteration: 3.37051E-10
995
996      Current parameter values                Previous parameter values
997      h1                40.2984                h1                40.2981
998      s1                148.998                s1                149.204
999      p1                0.898303                p1                0.899070
1000     o1                7.659821E-05                o1                7.614777E-05
1001     Maximum factor change: 1.006 ["o1"]
1002     Maximum relative change: 5.9154E-03 ["o1"]
1003
1004
1005     OPTIMISATION ITERATION NO.                : 16
1006     Model calls so far                : 90
1007     Derivative model calls so far      : 15
1008     Starting phi for this iteration: 3.37051E-10
1009
1010     Lambda = 1.19209E-06 ----->
1011     Phi = 3.25891E-10 ( 0.967 of starting phi)
1012
1013     Lambda = 5.96046E-07 ----->
1014     Phi = 3.25698E-10 ( 0.966 of starting phi)
1015
1016     No more lambdas: relative phi reduction between lambdas less than 0.0100
1017     Lowest phi this iteration: 3.25698E-10
1018
1019     Current parameter values                Previous parameter values
1020     h1                40.2808                h1                40.2984
1021     s1                154.458                s1                148.998
1022     p1                0.872214                p1                0.898303

```

```

1023         o1                8.324239E-05                o1                7.659821E-05
1024 Maximum factor change: 1.087 ["o1"]
1025 Maximum relative change: 8.6741E-02 ["o1"]
1026
1027
1028 OPTIMISATION ITERATION NO.          : 17
1029 Model calls so far                  : 96
1030 Derivative model calls so far       : 16
1031 Starting phi for this iteration:    3.25698E-10
1032
1033         Lambda = 2.98023E-07 ----->
1034         Phi = 2.75008E-10 ( 0.844 of starting phi)
1035
1036         Lambda = 1.49012E-07 ----->
1037         Phi = 2.70922E-10 ( 0.832 of starting phi)
1038
1039         Lambda = 7.45058E-08 ----->
1040         Phi = 2.68367E-10 ( 0.824 of starting phi)
1041
1042 No more lambdas: relative phi reduction between lambdas less than 0.0100
1043 Lowest phi this iteration: 2.68367E-10
1044
1045         Current parameter values                Previous parameter values
1046         h1                39.9957                h1                40.2808
1047         s1                176.381                s1                154.458
1048         p1                0.844869                p1                0.872214
1049         o1                1.200756E-04                o1                8.324239E-05
1050 Maximum factor change: 1.442 ["o1"]
1051 Maximum relative change: 0.4425 ["o1"]
1052
1053
1054 OPTIMISATION ITERATION NO.          : 18
1055 Model calls so far                  : 103
1056 Derivative model calls so far       : 17
1057 Starting phi for this iteration:    2.68367E-10
1058
1059         Lambda = 3.72529E-08 ----->
1060         Phi = 2.57827E-10 ( 0.961 of starting phi)
1061
1062         Lambda = 1.86265E-08 ----->
1063         Phi = 2.53019E-10 ( 0.943 of starting phi)
1064
1065         Lambda = 9.31323E-09 ----->
1066         Phi = 2.42539E-10 ( 0.904 of starting phi)
1067
1068         Lambda = 4.65661E-09 ----->
1069         Phi = 2.20859E-10 ( 0.823 of starting phi)
1070
1071         Lambda = 2.32831E-09 ----->
1072         Phi = 1.97463E-10 ( 0.736 of starting phi)
1073
1074         Lambda = 1.16415E-09 ----->
1075         Phi = 2.07024E-10 ( 0.771 of starting phi)
1076
1077 No more lambdas: phi rising
1078 Lowest phi this iteration: 1.97463E-10
1079
1080         Current parameter values                Previous parameter values
1081         h1                39.7282                h1                39.9957
1082         s1                184.139                s1                176.381
1083         p1                0.902757                p1                0.844869
1084         o1                1.143853E-04                o1                1.200756E-04
1085 Maximum factor change: 1.069 ["p1"]
1086 Maximum relative change: 6.8517E-02 ["p1"]
1087
1088
1089 OPTIMISATION ITERATION NO.          : 19
1090 Model calls so far                  : 113
1091 Derivative model calls so far       : 18
1092 Starting phi for this iteration:    1.97463E-10
1093
1094         Lambda = 1.00000E-08 ----->
1095         Phi = 1.74044E-10 ( 0.881 of starting phi)

```

```

1096
1097     Lambda = 5.00000E-09 ----->
1098     Phi = 1.68618E-10 ( 0.854 of starting phi)
1099
1100     Lambda = 2.50000E-09 ----->
1101     Phi = 1.59917E-10 ( 0.810 of starting phi)
1102
1103     Lambda = 1.25000E-09 ----->
1104     Phi = 1.49475E-10 ( 0.757 of starting phi)
1105
1106     Lambda = 6.25000E-10 ----->
1107     Phi = 1.40664E-10 ( 0.712 of starting phi)
1108
1109     Lambda = 3.12500E-10 ----->
1110     Phi = 1.34087E-10 ( 0.679 of starting phi)
1111
1112     Lambda = 1.56250E-10 ----->
1113     Phi = 1.29749E-10 ( 0.657 of starting phi)
1114
1115     Lambda = 7.81250E-11 ----->
1116     Phi = 1.27359E-10 ( 0.645 of starting phi)
1117
1118 No more lambdas: allowed lambdas per iteration = 8
1119 Lowest phi this iteration: 1.27359E-10
1120
1121     Current parameter values          Previous parameter values
1122     h1              39.2239             h1              39.7282
1123     s1              216.009             s1              184.139
1124     p1              0.895856            p1              0.902757
1125     o1              2.039755E-04        o1              1.143853E-04
1126 Maximum factor change: 1.783          ["o1"]
1127 Maximum relative change: 0.7832       ["o1"]
1128
1129
1130 OPTIMISATION ITERATION NO.           : 20
1131 Model calls so far                   : 125
1132 Derivative model calls so far       : 19
1133 Starting phi for this iteration: 1.27359E-10
1134
1135     Lambda = 1.00000E-08 ----->
1136     Phi = 1.05456E-10 ( 0.828 of starting phi)
1137
1138     Lambda = 5.00000E-09 ----->
1139     Phi = 1.04864E-10 ( 0.823 of starting phi)
1140
1141 No more lambdas: relative phi reduction between lambdas less than 0.0100
1142 Lowest phi this iteration: 1.04864E-10
1143
1144     Current parameter values          Previous parameter values
1145     h1              39.1801             h1              39.2239
1146     s1              220.772             s1              216.009
1147     p1              0.892353            p1              0.895856
1148     o1              1.888348E-04        o1              2.039755E-04
1149 Maximum factor change: 1.080          ["o1"]
1150 Maximum relative change: 7.4228E-02 ["o1"]
1151
1152
1153 OPTIMISATION ITERATION NO.           : 21
1154 Model calls so far                   : 131
1155 Derivative model calls so far       : 20
1156 Starting phi for this iteration: 1.04864E-10
1157
1158     Lambda = 1.00000E-08 ----->
1159     Phi = 1.03656E-10 ( 0.988 of starting phi)
1160
1161     Lambda = 5.00000E-09 ----->
1162     Phi = 1.02553E-10 ( 0.978 of starting phi)
1163
1164     Lambda = 2.50000E-09 ----->
1165     Phi = 1.01033E-10 ( 0.963 of starting phi)
1166
1167     Lambda = 1.25000E-09 ----->
1168     Phi = 1.00472E-10 ( 0.958 of starting phi)

```



```

1169
1170 No more lambdas: relative phi reduction between lambdas less than 0.0100
1171 Lowest phi this iteration: 1.00472E-10
1172
1173 Current parameter values Previous parameter values
1174 h1 39.1014 h1 39.1801
1175 s1 226.701 s1 220.772
1176 p1 0.889807 p1 0.892353
1177 o1 1.962592E-04 o1 1.888348E-04
1178 Maximum factor change: 1.039 ["o1"]
1179 Maximum relative change: 3.9317E-02 ["o1"]
1180
1181
1182 OPTIMISATION ITERATION NO. : 22
1183 Model calls so far : 139
1184 Derivative model calls so far : 21
1185 Starting phi for this iteration: 1.00472E-10
1186
1187 Lambda = 1.00000E-08 ----->
1188 Phi = 9.87595E-11 ( 0.983 of starting phi)
1189
1190 Lambda = 5.00000E-09 ----->
1191 Phi = 9.71659E-11 ( 0.967 of starting phi)
1192
1193 Lambda = 2.50000E-09 ----->
1194 Phi = 9.54897E-11 ( 0.950 of starting phi)
1195
1196 Lambda = 1.25000E-09 ----->
1197 Phi = 9.45401E-11 ( 0.941 of starting phi)
1198
1199 No more lambdas: relative phi reduction between lambdas less than 0.0100
1200 Lowest phi this iteration: 9.45401E-11
1201
1202 Current parameter values Previous parameter values
1203 h1 38.9139 h1 39.1014
1204 s1 241.801 s1 226.701
1205 p1 0.889801 p1 0.889807
1206 o1 2.213909E-04 o1 1.962592E-04
1207 Maximum factor change: 1.128 ["o1"]
1208 Maximum relative change: 0.1281 ["o1"]
1209
1210
1211 OPTIMISATION ITERATION NO. : 23
1212 Model calls so far : 147
1213 Derivative model calls so far : 22
1214 Starting phi for this iteration: 9.45401E-11
1215
1216 Lambda = 1.00000E-08 ----->
1217 Phi = 9.41861E-11 ( 0.996 of starting phi)
1218
1219 Lambda = 5.00000E-09 ----->
1220 Phi = 9.41302E-11 ( 0.996 of starting phi)
1221
1222 No more lambdas: relative phi reduction between lambdas less than 0.0100
1223 Lowest phi this iteration: 9.41302E-11
1224
1225 Current parameter values Previous parameter values
1226 h1 38.9023 h1 38.9139
1227 s1 242.067 s1 241.801
1228 p1 0.888611 p1 0.889801
1229 o1 2.205266E-04 o1 2.213909E-04
1230 Maximum factor change: 1.004 ["o1"]
1231 Maximum relative change: 3.9037E-03 ["o1"]
1232
1233
1234 OPTIMISATION ITERATION NO. : 24
1235 Model calls so far : 153
1236 Derivative model calls so far : 23
1237 Starting phi for this iteration: 9.41302E-11
1238
1239 Lambda = 1.00000E-08 ----->
1240 Phi = 9.40915E-11 ( 1.000 of starting phi)
1241

```

```

1242         Lambda = 5.00000E-09 ----->
1243         Phi = 9.40833E-11 ( 1.000 of starting phi)
1244
1245 No more lambdas: relative phi reduction between lambdas less than 0.0100
1246 Lowest phi this iteration: 9.40833E-11
1247
1248         Current parameter values                Previous parameter values
1249         h1                38.9005                h1                38.9023
1250         s1                242.330                s1                242.067
1251         p1                0.888559                p1                0.888611
1252         o1                2.209583E-04                o1                2.205266E-04
1253 Maximum factor change: 1.002 ["o1"]
1254 Maximum relative change: 1.9576E-03 ["o1"]
1255
1256
1257 OPTIMISATION ITERATION NO. : 25
1258 Model calls so far : 159
1259 Derivative model calls so far : 24
1260 Starting phi for this iteration: 9.40833E-11
1261
1262         Lambda = 1.00000E-08 ----->
1263         Phi = 9.37546E-11 ( 0.997 of starting phi)
1264
1265         Lambda = 5.00000E-09 ----->
1266         Phi = 9.34593E-11 ( 0.993 of starting phi)
1267
1268 No more lambdas: relative phi reduction between lambdas less than 0.0100
1269 Lowest phi this iteration: 9.34593E-11
1270
1271         Current parameter values                Previous parameter values
1272         h1                38.8504                h1                38.9005
1273         s1                247.573                s1                242.330
1274         p1                0.887755                p1                0.888559
1275         o1                2.295780E-04                o1                2.209583E-04
1276 Maximum factor change: 1.039 ["o1"]
1277 Maximum relative change: 3.9010E-02 ["o1"]
1278
1279
1280 OPTIMISATION ITERATION NO. : 26
1281 Model calls so far : 165
1282 Derivative model calls so far : 25
1283 Starting phi for this iteration: 9.34593E-11
1284
1285         Lambda = 1.00000E-08 ----->
1286         Phi = 9.33097E-11 ( 0.998 of starting phi)
1287
1288         Lambda = 5.00000E-09 ----->
1289         Phi = 9.32984E-11 ( 0.998 of starting phi)
1290
1291 No more lambdas: relative phi reduction between lambdas less than 0.0100
1292 Lowest phi this iteration: 9.32984E-11
1293
1294         Current parameter values                Previous parameter values
1295         h1                38.8403                h1                38.8504
1296         s1                247.212                s1                247.573
1297         p1                0.888011                p1                0.887755
1298         o1                2.287691E-04                o1                2.295780E-04
1299 Maximum factor change: 1.004 ["o1"]
1300 Maximum relative change: 3.5232E-03 ["o1"]
1301
1302
1303 OPTIMISATION ITERATION NO. : 27
1304 Model calls so far : 171
1305 Derivative model calls so far : 26
1306 Starting phi for this iteration: 9.32984E-11
1307
1308         Lambda = 1.00000E-08 ----->
1309         Phi = 9.32700E-11 ( 1.000 of starting phi)
1310
1311         Lambda = 5.00000E-09 ----->
1312         Phi = 9.32698E-11 ( 1.000 of starting phi)
1313
1314 No more lambdas: relative phi reduction between lambdas less than 0.0100

```

```

1315 Lowest phi this iteration: 9.32698E-11
1316
1317 Current parameter values Previous parameter values
1318 h1 38.8376 h1 38.8403
1319 s1 247.549 s1 247.212
1320 p1 0.887958 p1 0.888011
1321 o1 2.291732E-04 o1 2.287691E-04
1322 Maximum factor change: 1.002 ["o1"]
1323 Maximum relative change: 1.7663E-03 ["o1"]
1324
1325

```

```

1326 OPTIMISATION ITERATION NO. : 28
1327 Model calls so far : 177
1328 Derivative model calls so far : 27
1329 Starting phi for this iteration: 9.32698E-11
1330

```

```

1331 Lambda = 1.00000E-08 ----->
1332 Phi = 9.30904E-11 ( 0.998 of starting phi)
1333

```

```

1334 Lambda = 5.00000E-09 ----->
1335 Phi = 9.30452E-11 ( 0.998 of starting phi)
1336

```

```

1337 No more lambdas: relative phi reduction between lambdas less than 0.0100
1338 Lowest phi this iteration: 9.30452E-11
1339

```

```

1340 Current parameter values Previous parameter values
1341 h1 38.7989 h1 38.8376
1342 s1 250.144 s1 247.549
1343 p1 0.887726 p1 0.887958
1344 o1 2.339331E-04 o1 2.291732E-04
1345 Maximum factor change: 1.021 ["o1"]
1346 Maximum relative change: 2.0770E-02 ["o1"]
1347

```

```

1348 Optimisation complete: the 4 lowest phi's are within a relative distance
1349 of eachother of 5.000E-03
1350 Total model calls: 183
1351

```

```

1352 The model has been run one final time using best parameters.
1353 Thus all model input files contain best parameter values, and model
1354 output files contain model results based on these parameters.
1355

```

# 1356 OPTIMISATION RESULTS

```

1359 Covariance matrix and parameter confidence intervals cannot be determined:-
1360 Memory conservation is operative so that covariance matrix is not calculated.
1361

```

```

1363 Parameters ----->
1364

```

```

1365 Parameter Estimated value
1366 h1 38.7989
1367 s1 250.144
1368 p1 0.887726
1369 o1 2.339331E-04
1370

```

```

1371 See file mfit.sen for parameter sensitivities.
1372

```

```

1374 Observations ----->
1375

```

| Observation | Measured value | Calculated value | Residual     | Weight | Group |
|-------------|----------------|------------------|--------------|--------|-------|
| o1<br>conc  | 2.590000E-08   | 0.00000          | 2.590000E-08 | 1.000  |       |
| o2<br>conc  | 6.041790E-08   | 0.00000          | 6.041790E-08 | 1.000  |       |
| o3<br>conc  | 7.045510E-08   | 0.00000          | 7.045510E-08 | 1.000  |       |
| o4<br>conc  | 6.061850E-08   | 0.00000          | 6.061850E-08 | 1.000  |       |
| o5<br>conc  | 4.035480E-08   | 0.00000          | 4.035480E-08 | 1.000  |       |

|      |             |              |              |               |       |
|------|-------------|--------------|--------------|---------------|-------|
| 1383 | o6<br>conc  | 1.840630E-08 | 0.00000      | 1.840630E-08  | 1.000 |
| 1384 | o7<br>conc  | 2.862080E-09 | 6.548592-269 | 2.862080E-09  | 1.000 |
| 1385 | o8<br>conc  | 1.398620E-09 | 4.838414-224 | 1.398620E-09  | 1.000 |
| 1386 | o9<br>conc  | 1.242340E-08 | 1.685134-190 | 1.242340E-08  | 1.000 |
| 1387 | o10<br>conc | 2.511130E-08 | 1.654966-164 | 2.511130E-08  | 1.000 |
| 1388 | o11<br>conc | 2.840230E-08 | 8.453034-144 | 2.840230E-08  | 1.000 |
| 1389 | o12<br>conc | 1.623870E-08 | 6.209271-127 | 1.623870E-08  | 1.000 |
| 1390 | o13<br>conc | 1.391590E-09 | 5.996795-113 | 1.391590E-09  | 1.000 |
| 1391 | o14<br>conc | 0.00000      | 3.522993-101 | -3.522993-101 | 1.000 |
| 1392 | o15<br>conc | 8.042150E-09 | 3.759690E-91 | 8.042150E-09  | 1.000 |
| 1393 | o16<br>conc | 2.323690E-08 | 1.625667E-82 | 2.323690E-08  | 1.000 |
| 1394 | o17<br>conc | 3.486020E-08 | 5.197733E-75 | 3.486020E-08  | 1.000 |
| 1395 | o18<br>conc | 3.221440E-08 | 1.946555E-68 | 3.221440E-08  | 1.000 |
| 1396 | o19<br>conc | 2.012160E-08 | 1.221087E-62 | 2.012160E-08  | 1.000 |
| 1397 | o20<br>conc | 1.820490E-08 | 1.701727E-57 | 1.820490E-08  | 1.000 |
| 1398 | o21<br>conc | 2.995640E-08 | 6.603809E-53 | 2.995640E-08  | 1.000 |
| 1399 | o22<br>conc | 3.351660E-08 | 8.567701E-49 | 3.351660E-08  | 1.000 |
| 1400 | o23<br>conc | 1.735370E-08 | 4.315774E-45 | 1.735370E-08  | 1.000 |
| 1401 | o24<br>conc | 0.00000      | 9.550668E-42 | -9.550668E-42 | 1.000 |
| 1402 | o25<br>conc | 0.00000      | 1.029196E-38 | -1.029196E-38 | 1.000 |
| 1403 | o26<br>conc | 1.827050E-09 | 5.888479E-36 | 1.827050E-09  | 1.000 |
| 1404 | o27<br>conc | 0.00000      | 1.924506E-33 | -1.924506E-33 | 1.000 |
| 1405 | o28<br>conc | 2.878970E-09 | 3.823907E-31 | 2.878970E-09  | 1.000 |
| 1406 | o29<br>conc | 2.847040E-08 | 4.872594E-29 | 2.847040E-08  | 1.000 |
| 1407 | o30<br>conc | 5.884060E-08 | 4.169364E-27 | 5.884060E-08  | 1.000 |
| 1408 | o31<br>conc | 5.537600E-08 | 2.493219E-25 | 5.537600E-08  | 1.000 |
| 1409 | o32<br>conc | 2.838700E-08 | 1.078747E-23 | 2.838700E-08  | 1.000 |
| 1410 | o33<br>conc | 3.754250E-08 | 3.481354E-22 | 3.754250E-08  | 1.000 |
| 1411 | o34<br>conc | 9.696690E-08 | 8.606872E-21 | 9.696690E-08  | 1.000 |
| 1412 | o35<br>conc | 1.449780E-07 | 1.668957E-19 | 1.449780E-07  | 1.000 |
| 1413 | o36<br>conc | 1.388220E-07 | 2.591861E-18 | 1.388220E-07  | 1.000 |
| 1414 | o37<br>conc | 1.008400E-07 | 3.283983E-17 | 1.008400E-07  | 1.000 |
| 1415 | o38<br>conc | 6.353650E-08 | 3.451421E-16 | 6.353650E-08  | 1.000 |
| 1416 | o39<br>conc | 5.595610E-08 | 3.053735E-15 | 5.595610E-08  | 1.000 |
| 1417 | o40<br>conc | 6.928060E-08 | 2.304996E-14 | 6.928058E-08  | 1.000 |
| 1418 | o41<br>conc | 7.249730E-08 | 1.502128E-13 | 7.249715E-08  | 1.000 |
| 1419 | o42         | 5.923150E-08 | 8.543327E-13 | 5.923065E-08  | 1.000 |

|      |             |              |              |               |       |
|------|-------------|--------------|--------------|---------------|-------|
| 1420 | conc<br>o43 | 4.597250E-08 | 4.282238E-12 | 4.596822E-08  | 1.000 |
| 1421 | conc<br>o44 | 4.046490E-08 | 1.908465E-11 | 4.044582E-08  | 1.000 |
| 1422 | conc<br>o45 | 4.299730E-08 | 7.623672E-11 | 4.292106E-08  | 1.000 |
| 1423 | conc<br>o46 | 4.403430E-08 | 2.749779E-10 | 4.375932E-08  | 1.000 |
| 1424 | conc<br>o47 | 4.280100E-08 | 9.015621E-10 | 4.189944E-08  | 1.000 |
| 1425 | conc<br>o48 | 5.510130E-08 | 2.703473E-09 | 5.239783E-08  | 1.000 |
| 1426 | conc<br>o49 | 7.098810E-08 | 7.456249E-09 | 6.353185E-08  | 1.000 |
| 1427 | conc<br>o50 | 6.257670E-08 | 1.901238E-08 | 4.356432E-08  | 1.000 |
| 1428 | conc<br>o51 | 3.340120E-08 | 4.503375E-08 | -1.163255E-08 | 1.000 |
| 1429 | conc<br>o52 | 2.130400E-09 | 9.952524E-08 | -9.739484E-08 | 1.000 |
| 1430 | conc<br>o53 | 1.315980E-08 | 2.060562E-07 | -1.928964E-07 | 1.000 |
| 1431 | conc<br>o54 | 1.742090E-07 | 4.011705E-07 | -2.269615E-07 | 1.000 |
| 1432 | conc<br>o55 | 6.601930E-07 | 7.370206E-07 | -7.682758E-08 | 1.000 |
| 1433 | conc<br>o56 | 1.501590E-06 | 1.281881E-06 | 2.197095E-07  | 1.000 |
| 1434 | conc<br>o57 | 2.390120E-06 | 2.117128E-06 | 2.729919E-07  | 1.000 |
| 1435 | conc<br>o58 | 3.116340E-06 | 3.329709E-06 | -2.133686E-07 | 1.000 |
| 1436 | conc<br>o59 | 4.010250E-06 | 5.000056E-06 | -9.898055E-07 | 1.000 |
| 1437 | conc<br>o60 | 5.504160E-06 | 7.186757E-06 | -1.682597E-06 | 1.000 |
| 1438 | conc<br>o61 | 7.889550E-06 | 9.910560E-06 | -2.021010E-06 | 1.000 |
| 1439 | conc<br>o62 | 1.136910E-05 | 1.314113E-05 | -1.772029E-06 | 1.000 |
| 1440 | conc<br>o63 | 1.576620E-05 | 1.678997E-05 | -1.023769E-06 | 1.000 |
| 1441 | conc<br>o64 | 2.067220E-05 | 2.071196E-05 | -3.976305E-08 | 1.000 |
| 1442 | conc<br>o65 | 2.567570E-05 | 2.471626E-05 | 9.594354E-07  | 1.000 |
| 1443 | conc<br>o66 | 3.036650E-05 | 2.858524E-05 | 1.781259E-06  | 1.000 |
| 1444 | conc<br>o67 | 3.434180E-05 | 3.209842E-05 | 2.243381E-06  | 1.000 |
| 1445 | conc<br>o68 | 3.721140E-05 | 3.505732E-05 | 2.154080E-06  | 1.000 |
| 1446 | conc<br>o69 | 3.871450E-05 | 3.730699E-05 | 1.407509E-06  | 1.000 |
| 1447 | conc<br>o70 | 3.889650E-05 | 3.875090E-05 | 1.456021E-07  | 1.000 |
| 1448 | conc<br>o71 | 3.799760E-05 | 3.935732E-05 | -1.359722E-06 | 1.000 |
| 1449 | conc<br>o72 | 3.684470E-05 | 3.915710E-05 | -2.312397E-06 | 1.000 |
| 1450 | conc<br>o73 | 3.620540E-05 | 3.823404E-05 | -2.028644E-06 | 1.000 |
| 1451 | conc<br>o74 | 3.552260E-05 | 3.671048E-05 | -1.187880E-06 | 1.000 |
| 1452 | conc<br>o75 | 3.381830E-05 | 3.473057E-05 | -9.122716E-07 | 1.000 |
| 1453 | conc<br>o76 | 3.141060E-05 | 3.244415E-05 | -1.033547E-06 | 1.000 |
| 1454 | conc<br>o77 | 2.941670E-05 | 2.999296E-05 | -5.762602E-07 | 1.000 |
| 1455 | conc<br>o78 | 2.819400E-05 | 2.750064E-05 | 6.933642E-07  | 1.000 |

|      |              |              |              |               |       |
|------|--------------|--------------|--------------|---------------|-------|
| 1456 | o79<br>conc  | 2.731840E-05 | 2.506668E-05 | 2.251722E-06  | 1.000 |
| 1457 | o80<br>conc  | 2.593800E-05 | 2.276428E-05 | 3.173717E-06  | 1.000 |
| 1458 | o81<br>conc  | 2.274050E-05 | 2.064124E-05 | 2.099259E-06  | 1.000 |
| 1459 | o82<br>conc  | 1.876040E-05 | 1.872298E-05 | 3.741547E-08  | 1.000 |
| 1460 | o83<br>conc  | 1.644770E-05 | 1.701686E-05 | -5.691555E-07 | 1.000 |
| 1461 | o84<br>conc  | 1.546030E-05 | 1.551677E-05 | -5.646812E-08 | 1.000 |
| 1462 | o85<br>conc  | 1.447720E-05 | 1.420765E-05 | 2.695465E-07  | 1.000 |
| 1463 | o86<br>conc  | 1.325630E-05 | 1.306930E-05 | 1.870023E-07  | 1.000 |
| 1464 | o87<br>conc  | 1.213110E-05 | 1.207938E-05 | 5.171879E-08  | 1.000 |
| 1465 | o88<br>conc  | 1.106710E-05 | 1.121569E-05 | -1.485857E-07 | 1.000 |
| 1466 | o89<br>conc  | 1.003450E-05 | 1.045754E-05 | -4.230392E-07 | 1.000 |
| 1467 | o90<br>conc  | 9.242660E-06 | 9.786630E-06 | -5.439704E-07 | 1.000 |
| 1468 | o91<br>conc  | 8.848360E-06 | 9.187344E-06 | -3.389836E-07 | 1.000 |
| 1469 | o92<br>conc  | 8.809330E-06 | 8.646759E-06 | 1.625709E-07  | 1.000 |
| 1470 | o93<br>conc  | 8.093760E-06 | 8.154447E-06 | -6.068678E-08 | 1.000 |
| 1471 | o94<br>conc  | 7.046590E-06 | 7.702148E-06 | -6.555582E-07 | 1.000 |
| 1472 | o95<br>conc  | 7.096300E-06 | 7.283421E-06 | -1.871211E-07 | 1.000 |
| 1473 | o96<br>conc  | 6.642990E-06 | 6.893290E-06 | -2.502997E-07 | 1.000 |
| 1474 | o97<br>conc  | 6.279300E-06 | 6.527930E-06 | -2.486300E-07 | 1.000 |
| 1475 | o98<br>conc  | 6.008520E-06 | 6.184401E-06 | -1.758808E-07 | 1.000 |
| 1476 | o99<br>conc  | 5.694840E-06 | 5.860425E-06 | -1.655847E-07 | 1.000 |
| 1477 | o100<br>conc | 5.320280E-06 | 5.554215E-06 | -2.339350E-07 | 1.000 |
| 1478 | o101<br>conc | 4.943720E-06 | 5.264344E-06 | -3.206235E-07 | 1.000 |
| 1479 | o102<br>conc | 4.579720E-06 | 4.989642E-06 | -4.099220E-07 | 1.000 |
| 1480 | o103<br>conc | 4.272880E-06 | 4.729130E-06 | -4.562495E-07 | 1.000 |
| 1481 | o104<br>conc | 4.106740E-06 | 4.481961E-06 | -3.752213E-07 | 1.000 |
| 1482 | o105<br>conc | 3.955550E-06 | 4.247392E-06 | -2.918418E-07 | 1.000 |
| 1483 | o106<br>conc | 3.762510E-06 | 4.024749E-06 | -2.622394E-07 | 1.000 |
| 1484 | o107<br>conc | 3.487950E-06 | 3.813419E-06 | -3.254692E-07 | 1.000 |
| 1485 | o108<br>conc | 3.157850E-06 | 3.612831E-06 | -4.549806E-07 | 1.000 |
| 1486 | o109<br>conc | 3.073580E-06 | 3.422449E-06 | -3.488694E-07 | 1.000 |
| 1487 | o110<br>conc | 3.123350E-06 | 3.241772E-06 | -1.184221E-07 | 1.000 |
| 1488 | o111<br>conc | 2.972620E-06 | 3.070322E-06 | -9.770209E-08 | 1.000 |
| 1489 | o112<br>conc | 2.396930E-06 | 2.907647E-06 | -5.107169E-07 | 1.000 |
| 1490 | o113<br>conc | 2.161300E-06 | 2.753316E-06 | -5.920160E-07 | 1.000 |
| 1491 | o114<br>conc | 2.331570E-06 | 2.606919E-06 | -2.753495E-07 | 1.000 |
| 1492 | o115         | 2.195760E-06 | 2.468067E-06 | -2.723067E-07 | 1.000 |

|      |              |              |              |               |       |
|------|--------------|--------------|--------------|---------------|-------|
| 1493 | conc<br>o116 | 2.013480E-06 | 2.336385E-06 | -3.229053E-07 | 1.000 |
| 1494 | conc<br>o117 | 1.992600E-06 | 2.211520E-06 | -2.189202E-07 | 1.000 |
| 1495 | conc<br>o118 | 2.067110E-06 | 2.093133E-06 | -2.602300E-08 | 1.000 |
| 1496 | conc<br>o119 | 2.024050E-06 | 1.980901E-06 | 4.314887E-08  | 1.000 |
| 1497 | conc<br>o120 | 1.793380E-06 | 1.874517E-06 | -8.113713E-08 | 1.000 |
| 1498 | conc<br>o121 | 1.735330E-06 | 1.773688E-06 | -3.835802E-08 | 1.000 |
| 1499 | conc<br>o122 | 1.782960E-06 | 1.678135E-06 | 1.048253E-07  | 1.000 |
| 1500 | conc<br>o123 | 1.637310E-06 | 1.587591E-06 | 4.971872E-08  | 1.000 |
| 1501 | conc<br>o124 | 1.542970E-06 | 1.501805E-06 | 4.116536E-08  | 1.000 |
| 1502 | conc<br>o125 | 1.594510E-06 | 1.420534E-06 | 1.739763E-07  | 1.000 |
| 1503 | conc<br>o126 | 1.661020E-06 | 1.343549E-06 | 3.174710E-07  | 1.000 |
| 1504 | conc<br>o127 | 1.640720E-06 | 1.270632E-06 | 3.700878E-07  | 1.000 |
| 1505 | conc<br>o128 | 1.554100E-06 | 1.201576E-06 | 3.525245E-07  | 1.000 |
| 1506 | conc<br>o129 | 1.449310E-06 | 1.136181E-06 | 3.131287E-07  | 1.000 |
| 1507 | conc<br>o130 | 1.372540E-06 | 1.074261E-06 | 2.982786E-07  | 1.000 |
| 1508 | conc<br>o131 | 1.335330E-06 | 1.015637E-06 | 3.196928E-07  | 1.000 |
| 1509 | conc<br>o132 | 1.319800E-06 | 9.601386E-07 | 3.596614E-07  | 1.000 |
| 1510 | conc<br>o133 | 1.307100E-06 | 9.076039E-07 | 3.994961E-07  | 1.000 |
| 1511 | conc<br>o134 | 1.279690E-06 | 8.578797E-07 | 4.218103E-07  | 1.000 |
| 1512 | conc<br>o135 | 1.235570E-06 | 8.108199E-07 | 4.247501E-07  | 1.000 |
| 1513 | conc<br>o136 | 1.183070E-06 | 7.662859E-07 | 4.167841E-07  | 1.000 |
| 1514 | conc<br>o137 | 1.130690E-06 | 7.241458E-07 | 4.065442E-07  | 1.000 |
| 1515 | conc<br>o138 | 1.085970E-06 | 6.842746E-07 | 4.016954E-07  | 1.000 |
| 1516 | conc<br>o139 | 1.054120E-06 | 6.465534E-07 | 4.075666E-07  | 1.000 |
| 1517 | conc<br>o140 | 1.040060E-06 | 6.108693E-07 | 4.291907E-07  | 1.000 |
| 1518 | conc<br>o141 | 1.047440E-06 | 5.771152E-07 | 4.703248E-07  | 1.000 |
| 1519 | conc<br>o142 | 1.067610E-06 | 5.451895E-07 | 5.224205E-07  | 1.000 |
| 1520 | conc<br>o143 | 1.084930E-06 | 5.149954E-07 | 5.699346E-07  | 1.000 |
| 1521 | conc<br>o144 | 1.083670E-06 | 4.864416E-07 | 5.972284E-07  | 1.000 |
| 1522 | conc<br>o145 | 1.051100E-06 | 4.594410E-07 | 5.916590E-07  | 1.000 |
| 1523 | conc<br>o146 | 9.960480E-07 | 4.339112E-07 | 5.621368E-07  | 1.000 |
| 1524 | conc<br>o147 | 9.367260E-07 | 4.097739E-07 | 5.269521E-07  | 1.000 |
| 1525 | conc<br>o148 | 8.912290E-07 | 3.869550E-07 | 5.042740E-07  | 1.000 |
| 1526 | conc<br>o149 | 8.673420E-07 | 3.653841E-07 | 5.019579E-07  | 1.000 |
| 1527 | conc<br>o150 | 8.570490E-07 | 3.449944E-07 | 5.120546E-07  | 1.000 |
| 1528 | conc<br>o151 | 8.509940E-07 | 3.257228E-07 | 5.252712E-07  | 1.000 |

|      |              |              |              |              |       |
|------|--------------|--------------|--------------|--------------|-------|
| 1529 | o152<br>conc | 8.410760E-07 | 3.075093E-07 | 5.335667E-07 | 1.000 |
| 1530 | o153<br>conc | 8.267230E-07 | 2.902969E-07 | 5.364261E-07 | 1.000 |
| 1531 | o154<br>conc | 8.101600E-07 | 2.740319E-07 | 5.361281E-07 | 1.000 |
| 1532 | o155<br>conc | 7.936160E-07 | 2.586632E-07 | 5.349528E-07 | 1.000 |
| 1533 | o156<br>conc | 7.787460E-07 | 2.441424E-07 | 5.346036E-07 | 1.000 |
| 1534 | o157<br>conc | 7.646170E-07 | 2.304237E-07 | 5.341933E-07 | 1.000 |
| 1535 | o158<br>conc | 7.495700E-07 | 2.174636E-07 | 5.321064E-07 | 1.000 |
| 1536 | o159<br>conc | 7.320050E-07 | 2.052210E-07 | 5.267840E-07 | 1.000 |
| 1537 | o160<br>conc | 7.117650E-07 | 1.936570E-07 | 5.181080E-07 | 1.000 |
| 1538 | o161<br>conc | 6.901710E-07 | 1.827347E-07 | 5.074363E-07 | 1.000 |
| 1539 | o162<br>conc | 6.686150E-07 | 1.724191E-07 | 4.961959E-07 | 1.000 |
| 1540 | o163<br>conc | 6.488390E-07 | 1.626772E-07 | 4.861618E-07 | 1.000 |
| 1541 | o164<br>conc | 6.339230E-07 | 1.534776E-07 | 4.804454E-07 | 1.000 |
| 1542 | o165<br>conc | 6.272630E-07 | 1.447907E-07 | 4.824723E-07 | 1.000 |
| 1543 | o166<br>conc | 6.322520E-07 | 1.365884E-07 | 4.956636E-07 | 1.000 |
| 1544 | o167<br>conc | 6.483740E-07 | 1.288442E-07 | 5.195298E-07 | 1.000 |
| 1545 | o168<br>conc | 6.640750E-07 | 1.215328E-07 | 5.425422E-07 | 1.000 |
| 1546 | o169<br>conc | 6.717990E-07 | 1.146307E-07 | 5.571683E-07 | 1.000 |
| 1547 | o170<br>conc | 6.722490E-07 | 1.081151E-07 | 5.641339E-07 | 1.000 |
| 1548 | o171<br>conc | 6.667270E-07 | 1.019649E-07 | 5.647621E-07 | 1.000 |
| 1549 | o172<br>conc | 6.565360E-07 | 9.615986E-08 | 5.603761E-07 | 1.000 |
| 1550 | o173<br>conc | 6.429800E-07 | 9.068094E-08 | 5.522991E-07 | 1.000 |
| 1551 | o174<br>conc | 6.273620E-07 | 8.551011E-08 | 5.418519E-07 | 1.000 |
| 1552 | o175<br>conc | 6.109860E-07 | 8.063031E-08 | 5.303557E-07 | 1.000 |
| 1553 | o176<br>conc | 5.948490E-07 | 7.602543E-08 | 5.188236E-07 | 1.000 |
| 1554 | o177<br>conc | 5.787370E-07 | 7.168022E-08 | 5.070568E-07 | 1.000 |
| 1555 | o178<br>conc | 5.621310E-07 | 6.758025E-08 | 4.945508E-07 | 1.000 |
| 1556 | o179<br>conc | 5.445970E-07 | 6.371188E-08 | 4.808851E-07 | 1.000 |
| 1557 | o180<br>conc | 5.274260E-07 | 6.006224E-08 | 4.673638E-07 | 1.000 |
| 1558 | o181<br>conc | 5.135020E-07 | 5.661913E-08 | 4.568829E-07 | 1.000 |
| 1559 | o182<br>conc | 5.057720E-07 | 5.337104E-08 | 4.524010E-07 | 1.000 |
| 1560 | o183<br>conc | 5.056420E-07 | 5.030707E-08 | 4.553349E-07 | 1.000 |
| 1561 | o184<br>conc | 5.093550E-07 | 4.741694E-08 | 4.619381E-07 | 1.000 |
| 1562 | o185<br>conc | 5.120720E-07 | 4.469093E-08 | 4.673811E-07 | 1.000 |
| 1563 | o186<br>conc | 5.089570E-07 | 4.211983E-08 | 4.668372E-07 | 1.000 |
| 1564 | o187<br>conc | 4.979250E-07 | 3.969497E-08 | 4.582300E-07 | 1.000 |
| 1565 | o188         | 4.838970E-07 | 3.740814E-08 | 4.464889E-07 | 1.000 |



|      |              |              |              |              |       |
|------|--------------|--------------|--------------|--------------|-------|
| 1566 | conc<br>o189 | 4.728920E-07 | 3.525159E-08 | 4.376404E-07 | 1.000 |
| 1567 | conc<br>o190 | 4.702190E-07 | 3.321799E-08 | 4.370010E-07 | 1.000 |
| 1568 | conc<br>o191 | 4.733380E-07 | 3.130043E-08 | 4.420376E-07 | 1.000 |
| 1569 | conc<br>o192 | 4.748510E-07 | 2.949237E-08 | 4.453586E-07 | 1.000 |
| 1570 | conc<br>o193 | 4.673070E-07 | 2.778763E-08 | 4.395194E-07 | 1.000 |
| 1571 | conc<br>o194 | 4.478510E-07 | 2.618039E-08 | 4.216706E-07 | 1.000 |
| 1572 | conc<br>o195 | 4.235710E-07 | 2.466514E-08 | 3.989059E-07 | 1.000 |
| 1573 | conc<br>o196 | 4.028560E-07 | 2.323668E-08 | 3.796193E-07 | 1.000 |
| 1574 | conc<br>o197 | 3.940200E-07 | 2.189010E-08 | 3.721299E-07 | 1.000 |
| 1575 | conc<br>o198 | 3.997040E-07 | 2.062076E-08 | 3.790832E-07 | 1.000 |
| 1576 | conc<br>o199 | 4.130600E-07 | 1.942428E-08 | 3.936357E-07 | 1.000 |
| 1577 | conc<br>o200 | 4.263430E-07 | 1.829653E-08 | 4.080465E-07 | 1.000 |
| 1578 | conc<br>o201 | 4.326460E-07 | 1.723361E-08 | 4.154124E-07 | 1.000 |
| 1579 | conc<br>o202 | 4.306550E-07 | 1.623184E-08 | 4.144232E-07 | 1.000 |
| 1580 | conc<br>o203 | 4.213290E-07 | 1.528773E-08 | 4.060413E-07 | 1.000 |
| 1581 | conc<br>o204 | 4.056960E-07 | 1.439801E-08 | 3.912980E-07 | 1.000 |
| 1582 | conc<br>o205 | 3.878020E-07 | 1.355957E-08 | 3.742424E-07 | 1.000 |
| 1583 | conc<br>o206 | 3.760210E-07 | 1.276950E-08 | 3.632515E-07 | 1.000 |
| 1584 | conc<br>o207 | 3.790600E-07 | 1.202504E-08 | 3.670350E-07 | 1.000 |
| 1585 | conc<br>o208 | 4.048110E-07 | 1.132357E-08 | 3.934874E-07 | 1.000 |
| 1586 | conc<br>o209 | 4.380700E-07 | 1.066265E-08 | 4.274074E-07 | 1.000 |
| 1587 | conc<br>o210 | 4.505410E-07 | 1.003995E-08 | 4.405010E-07 | 1.000 |
| 1588 | conc<br>o211 | 4.448250E-07 | 9.453293E-09 | 4.353717E-07 | 1.000 |
| 1589 | conc<br>o212 | 4.285460E-07 | 8.900607E-09 | 4.196454E-07 | 1.000 |
| 1590 | conc<br>o213 | 4.093090E-07 | 8.379949E-09 | 4.009291E-07 | 1.000 |
| 1591 | conc<br>o214 | 3.923830E-07 | 7.889479E-09 | 3.844935E-07 | 1.000 |
| 1592 | conc<br>o215 | 3.785030E-07 | 7.427467E-09 | 3.710755E-07 | 1.000 |
| 1593 | conc<br>o216 | 3.678840E-07 | 6.992277E-09 | 3.608917E-07 | 1.000 |
| 1594 | conc<br>o217 | 3.606130E-07 | 6.582368E-09 | 3.540306E-07 | 1.000 |
| 1595 | conc<br>o218 | 3.557500E-07 | 6.196285E-09 | 3.495537E-07 | 1.000 |
| 1596 | conc<br>o219 | 3.518660E-07 | 5.832658E-09 | 3.460333E-07 | 1.000 |
| 1597 | conc<br>o220 | 3.475430E-07 | 5.490191E-09 | 3.420528E-07 | 1.000 |
| 1598 | conc<br>o221 | 3.421740E-07 | 5.167667E-09 | 3.370063E-07 | 1.000 |
| 1599 | conc<br>o222 | 3.365050E-07 | 4.863935E-09 | 3.316411E-07 | 1.000 |
| 1600 | conc<br>o223 | 3.314100E-07 | 4.577909E-09 | 3.268321E-07 | 1.000 |
| 1601 | conc<br>o224 | 3.277660E-07 | 4.308568E-09 | 3.234574E-07 | 1.000 |

|      |              |              |              |              |       |
|------|--------------|--------------|--------------|--------------|-------|
| 1602 | o225<br>conc | 3.266420E-07 | 4.054947E-09 | 3.225871E-07 | 1.000 |
| 1603 | o226<br>conc | 3.293540E-07 | 3.816137E-09 | 3.255379E-07 | 1.000 |
| 1604 | o227<br>conc | 3.372350E-07 | 3.591281E-09 | 3.336437E-07 | 1.000 |
| 1605 | o228<br>conc | 3.503730E-07 | 3.379570E-09 | 3.469934E-07 | 1.000 |
| 1606 | o229<br>conc | 3.627350E-07 | 3.180244E-09 | 3.595548E-07 | 1.000 |
| 1607 | o230<br>conc | 3.664120E-07 | 2.992584E-09 | 3.634194E-07 | 1.000 |
| 1608 | o231<br>conc | 3.538240E-07 | 2.815913E-09 | 3.510081E-07 | 1.000 |
| 1609 | o232<br>conc | 3.267250E-07 | 2.649593E-09 | 3.240754E-07 | 1.000 |
| 1610 | o233<br>conc | 2.972220E-07 | 2.493023E-09 | 2.947290E-07 | 1.000 |
| 1611 | o234<br>conc | 2.779620E-07 | 2.345637E-09 | 2.756164E-07 | 1.000 |
| 1612 | o235<br>conc | 2.807770E-07 | 2.206900E-09 | 2.785701E-07 | 1.000 |
| 1613 | o236<br>conc | 3.027670E-07 | 2.076308E-09 | 3.006907E-07 | 1.000 |
| 1614 | o237<br>conc | 3.282720E-07 | 1.953388E-09 | 3.263186E-07 | 1.000 |
| 1615 | o238<br>conc | 3.412080E-07 | 1.837693E-09 | 3.393703E-07 | 1.000 |
| 1616 | o239<br>conc | 3.313560E-07 | 1.728802E-09 | 3.296272E-07 | 1.000 |
| 1617 | o240<br>conc | 3.067770E-07 | 1.626317E-09 | 3.051507E-07 | 1.000 |
| 1618 | o241<br>conc | 2.790880E-07 | 1.529864E-09 | 2.775581E-07 | 1.000 |
| 1619 | o242<br>conc | 2.593120E-07 | 1.439092E-09 | 2.578729E-07 | 1.000 |
| 1620 | o243<br>conc | 2.500270E-07 | 1.353669E-09 | 2.486733E-07 | 1.000 |
| 1621 | o244<br>conc | 2.475120E-07 | 1.273281E-09 | 2.462387E-07 | 1.000 |
| 1622 | o245<br>conc | 2.478980E-07 | 1.197635E-09 | 2.467004E-07 | 1.000 |
| 1623 | o246<br>conc | 2.476030E-07 | 1.126452E-09 | 2.464765E-07 | 1.000 |
| 1624 | o247<br>conc | 2.459700E-07 | 1.059472E-09 | 2.449105E-07 | 1.000 |
| 1625 | o248<br>conc | 2.440310E-07 | 9.964474E-10 | 2.430346E-07 | 1.000 |
| 1626 | o249<br>conc | 2.428400E-07 | 9.371475E-10 | 2.419029E-07 | 1.000 |
| 1627 | o250<br>conc | 2.429470E-07 | 8.813534E-10 | 2.420656E-07 | 1.000 |
| 1628 | o251<br>conc | 2.438980E-07 | 8.288594E-10 | 2.430691E-07 | 1.000 |
| 1629 | o252<br>conc | 2.451130E-07 | 7.794717E-10 | 2.443335E-07 | 1.000 |
| 1630 | o253<br>conc | 2.460160E-07 | 7.330079E-10 | 2.452830E-07 | 1.000 |
| 1631 | o254<br>conc | 2.460300E-07 | 6.892960E-10 | 2.453407E-07 | 1.000 |
| 1632 | o255<br>conc | 2.445760E-07 | 6.481743E-10 | 2.439278E-07 | 1.000 |
| 1633 | o256<br>conc | 2.410770E-07 | 6.094904E-10 | 2.404675E-07 | 1.000 |
| 1634 | o257<br>conc | 2.349560E-07 | 5.731007E-10 | 2.343829E-07 | 1.000 |
| 1635 | o258<br>conc | 2.256350E-07 | 5.388702E-10 | 2.250961E-07 | 1.000 |
| 1636 | o259<br>conc | 2.127040E-07 | 5.066717E-10 | 2.121973E-07 | 1.000 |
| 1637 | o260<br>conc | 1.975550E-07 | 4.763852E-10 | 1.970786E-07 | 1.000 |
| 1638 | o261         | 1.826670E-07 | 4.478982E-10 | 1.822191E-07 | 1.000 |

|      |              |              |              |              |       |
|------|--------------|--------------|--------------|--------------|-------|
| 1639 | conc<br>o262 | 1.705390E-07 | 4.211043E-10 | 1.701179E-07 | 1.000 |
| 1640 | conc<br>o263 | 1.636690E-07 | 3.959037E-10 | 1.632731E-07 | 1.000 |
| 1641 | conc<br>o264 | 1.644490E-07 | 3.722022E-10 | 1.640768E-07 | 1.000 |
| 1642 | conc<br>o265 | 1.726930E-07 | 3.499113E-10 | 1.723431E-07 | 1.000 |
| 1643 | conc<br>o266 | 1.855120E-07 | 3.289475E-10 | 1.851831E-07 | 1.000 |
| 1644 | conc<br>o267 | 1.998920E-07 | 3.092323E-10 | 1.995828E-07 | 1.000 |
| 1645 | conc<br>o268 | 2.128170E-07 | 2.906919E-10 | 2.125263E-07 | 1.000 |
| 1646 | conc<br>o269 | 2.212710E-07 | 2.732568E-10 | 2.209977E-07 | 1.000 |
| 1647 | conc<br>o270 | 2.227080E-07 | 2.568613E-10 | 2.224511E-07 | 1.000 |
| 1648 | conc<br>o271 | 2.176220E-07 | 2.414440E-10 | 2.173806E-07 | 1.000 |
| 1649 | conc<br>o272 | 2.077180E-07 | 2.269469E-10 | 2.074911E-07 | 1.000 |
| 1650 | conc<br>o273 | 1.947020E-07 | 2.133154E-10 | 1.944887E-07 | 1.000 |
| 1651 | conc<br>o274 | 1.802810E-07 | 2.004980E-10 | 1.800805E-07 | 1.000 |
| 1652 | conc<br>o275 | 1.661270E-07 | 1.884466E-10 | 1.659386E-07 | 1.000 |
| 1653 | conc<br>o276 | 1.534240E-07 | 1.771155E-10 | 1.532469E-07 | 1.000 |
| 1654 | conc<br>o277 | 1.430190E-07 | 1.664621E-10 | 1.428525E-07 | 1.000 |
| 1655 | conc<br>o278 | 1.357500E-07 | 1.564460E-10 | 1.355936E-07 | 1.000 |
| 1656 | conc<br>o279 | 1.324550E-07 | 1.470293E-10 | 1.323080E-07 | 1.000 |
| 1657 | conc<br>o280 | 1.339740E-07 | 1.381763E-10 | 1.338358E-07 | 1.000 |
| 1658 | conc<br>o281 | 1.405780E-07 | 1.298536E-10 | 1.404481E-07 | 1.000 |
| 1659 | conc<br>o282 | 1.502300E-07 | 1.220296E-10 | 1.501080E-07 | 1.000 |
| 1660 | conc<br>o283 | 1.603050E-07 | 1.146744E-10 | 1.601903E-07 | 1.000 |
| 1661 | conc<br>o284 | 1.681780E-07 | 1.077603E-10 | 1.680702E-07 | 1.000 |
| 1662 | conc<br>o285 | 1.712250E-07 | 1.012609E-10 | 1.711237E-07 | 1.000 |
| 1663 | conc<br>o286 | 1.672560E-07 | 9.515150E-11 | 1.671608E-07 | 1.000 |
| 1664 | conc<br>o287 | 1.574450E-07 | 8.940879E-11 | 1.573556E-07 | 1.000 |
| 1665 | conc<br>o288 | 1.445270E-07 | 8.401091E-11 | 1.444430E-07 | 1.000 |
| 1666 | conc<br>o289 | 1.312480E-07 | 7.893727E-11 | 1.311691E-07 | 1.000 |
| 1667 | conc<br>o290 | 1.203520E-07 | 7.416849E-11 | 1.202778E-07 | 1.000 |
| 1668 | conc<br>o291 | 1.145800E-07 | 6.968637E-11 | 1.145103E-07 | 1.000 |
| 1669 | conc<br>o292 | 1.155330E-07 | 6.547376E-11 | 1.154675E-07 | 1.000 |
| 1670 | conc<br>o293 | 1.218370E-07 | 6.151455E-11 | 1.217755E-07 | 1.000 |
| 1671 | conc<br>o294 | 1.316430E-07 | 5.779358E-11 | 1.315852E-07 | 1.000 |
| 1672 | conc<br>o295 | 1.431010E-07 | 5.429659E-11 | 1.430467E-07 | 1.000 |
| 1673 | conc<br>o296 | 1.543620E-07 | 5.101017E-11 | 1.543110E-07 | 1.000 |
| 1674 | conc<br>o297 | 1.637930E-07 | 4.792171E-11 | 1.637451E-07 | 1.000 |

|      |              |              |              |              |       |
|------|--------------|--------------|--------------|--------------|-------|
| 1675 | o298<br>conc | 1.708000E-07 | 4.501935E-11 | 1.707550E-07 | 1.000 |
| 1676 | o299<br>conc | 1.751040E-07 | 4.229193E-11 | 1.750617E-07 | 1.000 |
| 1677 | o300<br>conc | 1.764210E-07 | 3.972897E-11 | 1.763813E-07 | 1.000 |
| 1678 | o301<br>conc | 1.744710E-07 | 3.732059E-11 | 1.744337E-07 | 1.000 |
| 1679 | o302<br>conc | 1.689780E-07 | 3.505752E-11 | 1.689429E-07 | 1.000 |
| 1680 | o303<br>conc | 1.601270E-07 | 3.293105E-11 | 1.600941E-07 | 1.000 |
| 1681 | o304<br>conc | 1.488840E-07 | 3.093296E-11 | 1.488531E-07 | 1.000 |
| 1682 | o305<br>conc | 1.362920E-07 | 2.905555E-11 | 1.362629E-07 | 1.000 |
| 1683 | o306<br>conc | 1.233950E-07 | 2.729157E-11 | 1.233677E-07 | 1.000 |
| 1684 | o307<br>conc | 1.112360E-07 | 2.563419E-11 | 1.112104E-07 | 1.000 |
| 1685 | o308<br>conc | 1.008570E-07 | 2.407701E-11 | 1.008329E-07 | 1.000 |
| 1686 | o309<br>conc | 9.328990E-08 | 2.261399E-11 | 9.326729E-08 | 1.000 |
| 1687 | o310<br>conc | 8.893630E-08 | 2.123947E-11 | 8.891506E-08 | 1.000 |
| 1688 | o311<br>conc | 8.728010E-08 | 1.994813E-11 | 8.726015E-08 | 1.000 |
| 1689 | o312<br>conc | 8.773220E-08 | 1.873496E-11 | 8.771347E-08 | 1.000 |
| 1690 | o313<br>conc | 8.970370E-08 | 1.759524E-11 | 8.968610E-08 | 1.000 |
| 1691 | o314<br>conc | 9.260560E-08 | 1.652455E-11 | 9.258908E-08 | 1.000 |
| 1692 | o315<br>conc | 9.584880E-08 | 1.551873E-11 | 9.583328E-08 | 1.000 |
| 1693 | o316<br>conc | 9.884430E-08 | 1.457387E-11 | 9.882973E-08 | 1.000 |
| 1694 | o317<br>conc | 1.011340E-07 | 1.368629E-11 | 1.011203E-07 | 1.000 |
| 1695 | o318<br>conc | 1.028180E-07 | 1.285254E-11 | 1.028051E-07 | 1.000 |
| 1696 | o319<br>conc | 1.041430E-07 | 1.206936E-11 | 1.041309E-07 | 1.000 |
| 1697 | o320<br>conc | 1.053590E-07 | 1.133370E-11 | 1.053477E-07 | 1.000 |
| 1698 | o321<br>conc | 1.067130E-07 | 1.064269E-11 | 1.067024E-07 | 1.000 |
| 1699 | o322<br>conc | 1.084520E-07 | 9.993643E-12 | 1.084420E-07 | 1.000 |
| 1700 | o323<br>conc | 1.108260E-07 | 9.384009E-12 | 1.108166E-07 | 1.000 |
| 1701 | o324<br>conc | 1.140510E-07 | 8.811410E-12 | 1.140422E-07 | 1.000 |
| 1702 | o325<br>conc | 1.178980E-07 | 8.273607E-12 | 1.178897E-07 | 1.000 |
| 1703 | o326<br>conc | 1.217920E-07 | 7.768494E-12 | 1.217842E-07 | 1.000 |
| 1704 | o327<br>conc | 1.251530E-07 | 7.294094E-12 | 1.251457E-07 | 1.000 |
| 1705 | o328<br>conc | 1.273980E-07 | 6.848547E-12 | 1.273912E-07 | 1.000 |
| 1706 | o329<br>conc | 1.279450E-07 | 6.430105E-12 | 1.279386E-07 | 1.000 |
| 1707 | o330<br>conc | 1.262120E-07 | 6.037128E-12 | 1.262060E-07 | 1.000 |
| 1708 | o331<br>conc | 1.216930E-07 | 5.668072E-12 | 1.216873E-07 | 1.000 |
| 1709 | o332<br>conc | 1.147900E-07 | 5.321487E-12 | 1.147847E-07 | 1.000 |
| 1710 | o333<br>conc | 1.064960E-07 | 4.996011E-12 | 1.064910E-07 | 1.000 |
| 1711 | o334         | 9.781810E-08 | 4.690364E-12 | 9.781341E-08 | 1.000 |

|      |              |              |              |              |       |
|------|--------------|--------------|--------------|--------------|-------|
| 1712 | conc<br>o335 | 8.976220E-08 | 4.403343E-12 | 8.975780E-08 | 1.000 |
| 1713 | conc<br>o336 | 8.333400E-08 | 4.133818E-12 | 8.332987E-08 | 1.000 |
| 1714 | conc<br>o337 | 7.953930E-08 | 3.880727E-12 | 7.953542E-08 | 1.000 |
| 1715 | conc<br>o338 | 7.937580E-08 | 3.643071E-12 | 7.937216E-08 | 1.000 |
| 1716 | conc<br>o339 | 8.310890E-08 | 3.419914E-12 | 8.310548E-08 | 1.000 |
| 1717 | conc<br>o340 | 8.970640E-08 | 3.210375E-12 | 8.970319E-08 | 1.000 |
| 1718 | conc<br>o341 | 9.800290E-08 | 3.013625E-12 | 9.799989E-08 | 1.000 |
| 1719 | conc<br>o342 | 1.068330E-07 | 2.828888E-12 | 1.068302E-07 | 1.000 |
| 1720 | conc<br>o343 | 1.150320E-07 | 2.655433E-12 | 1.150293E-07 | 1.000 |
| 1721 | conc<br>o344 | 1.214330E-07 | 2.492574E-12 | 1.214305E-07 | 1.000 |
| 1722 | conc<br>o345 | 1.248720E-07 | 2.339666E-12 | 1.248697E-07 | 1.000 |
| 1723 | conc<br>o346 | 1.244490E-07 | 2.196104E-12 | 1.244468E-07 | 1.000 |
| 1724 | conc<br>o347 | 1.206740E-07 | 2.061319E-12 | 1.206719E-07 | 1.000 |
| 1725 | conc<br>o348 | 1.145190E-07 | 1.934775E-12 | 1.145171E-07 | 1.000 |
| 1726 | conc<br>o349 | 1.069590E-07 | 1.815972E-12 | 1.069572E-07 | 1.000 |
| 1727 | conc<br>o350 | 9.896780E-08 | 1.704438E-12 | 9.896610E-08 | 1.000 |
| 1728 | conc<br>o351 | 9.151880E-08 | 1.599729E-12 | 9.151720E-08 | 1.000 |
| 1729 | conc<br>o352 | 8.558610E-08 | 1.501430E-12 | 8.558460E-08 | 1.000 |
| 1730 | conc<br>o353 | 8.210600E-08 | 1.409149E-12 | 8.210459E-08 | 1.000 |
| 1731 | conc<br>o354 | 8.126640E-08 | 1.322520E-12 | 8.126508E-08 | 1.000 |
| 1732 | conc<br>o355 | 8.256360E-08 | 1.241198E-12 | 8.256236E-08 | 1.000 |
| 1733 | conc<br>o356 | 8.546820E-08 | 1.164859E-12 | 8.546704E-08 | 1.000 |
| 1734 | conc<br>o357 | 8.945030E-08 | 1.093199E-12 | 8.944921E-08 | 1.000 |
| 1735 | conc<br>o358 | 9.398060E-08 | 1.025931E-12 | 9.397957E-08 | 1.000 |
| 1736 | conc<br>o359 | 9.852930E-08 | 9.627889E-13 | 9.852834E-08 | 1.000 |
| 1737 | conc<br>o360 | 1.025670E-07 | 9.035193E-13 | 1.025661E-07 | 1.000 |
| 1738 | conc<br>o361 | 1.056860E-07 | 8.478858E-13 | 1.056852E-07 | 1.000 |
| 1739 | conc<br>o362 | 1.077830E-07 | 7.956662E-13 | 1.077822E-07 | 1.000 |
| 1740 | conc<br>o363 | 1.088070E-07 | 7.466519E-13 | 1.088063E-07 | 1.000 |
| 1741 | conc<br>o364 | 1.087020E-07 | 7.006466E-13 | 1.087013E-07 | 1.000 |
| 1742 | conc<br>o365 | 1.074160E-07 | 6.574665E-13 | 1.074153E-07 | 1.000 |
| 1743 | conc<br>o366 | 1.048950E-07 | 6.169387E-13 | 1.048944E-07 | 1.000 |
| 1744 | conc<br>o367 | 1.010860E-07 | 5.789007E-13 | 1.010854E-07 | 1.000 |
| 1745 | conc<br>o368 | 9.611800E-08 | 5.432009E-13 | 9.611746E-08 | 1.000 |
| 1746 | conc<br>o369 | 9.050930E-08 | 5.096941E-13 | 9.050879E-08 | 1.000 |
| 1747 | conc<br>o370 | 8.482960E-08 | 4.782480E-13 | 8.482912E-08 | 1.000 |

|      |              |              |              |              |       |
|------|--------------|--------------|--------------|--------------|-------|
| 1748 | o371<br>conc | 7.964840E-08 | 4.487356E-13 | 7.964795E-08 | 1.000 |
| 1749 | o372<br>conc | 7.553540E-08 | 4.210385E-13 | 7.553498E-08 | 1.000 |
| 1750 | o373<br>conc | 7.306010E-08 | 3.950454E-13 | 7.305970E-08 | 1.000 |
| 1751 | o374<br>conc | 7.279220E-08 | 3.706518E-13 | 7.279183E-08 | 1.000 |
| 1752 | o375<br>conc | 7.514010E-08 | 3.477597E-13 | 7.513975E-08 | 1.000 |
| 1753 | o376<br>conc | 7.944540E-08 | 3.262769E-13 | 7.944507E-08 | 1.000 |
| 1754 | o377<br>conc | 8.461630E-08 | 3.061170E-13 | 8.461599E-08 | 1.000 |
| 1755 | o378<br>conc | 8.955980E-08 | 2.871987E-13 | 8.955951E-08 | 1.000 |
| 1756 | o379<br>conc | 9.318290E-08 | 2.694460E-13 | 9.318263E-08 | 1.000 |
| 1757 | o380<br>conc | 9.439240E-08 | 2.527871E-13 | 9.439215E-08 | 1.000 |
| 1758 | o381<br>conc | 9.209550E-08 | 2.371550E-13 | 9.209526E-08 | 1.000 |
| 1759 | o382<br>conc | 8.524380E-08 | 2.224866E-13 | 8.524358E-08 | 1.000 |
| 1760 | o383<br>conc | 7.405490E-08 | 2.087226E-13 | 7.405469E-08 | 1.000 |
| 1761 | o384<br>conc | 6.015780E-08 | 1.958075E-13 | 6.015760E-08 | 1.000 |
| 1762 | o385<br>conc | 4.525560E-08 | 1.836891E-13 | 4.525542E-08 | 1.000 |
| 1763 | o386<br>conc | 3.105130E-08 | 1.723184E-13 | 3.105113E-08 | 1.000 |
| 1764 | o387<br>conc | 1.924800E-08 | 1.616495E-13 | 1.924784E-08 | 1.000 |
| 1765 | o388<br>conc | 1.154880E-08 | 1.516391E-13 | 1.154865E-08 | 1.000 |
| 1766 | o389<br>conc | 9.269960E-09 | 1.422467E-13 | 9.269818E-09 | 1.000 |
| 1767 | o390<br>conc | 1.192830E-08 | 1.334343E-13 | 1.192817E-08 | 1.000 |
| 1768 | o391<br>conc | 1.851730E-08 | 1.251663E-13 | 1.851717E-08 | 1.000 |
| 1769 | o392<br>conc | 2.803040E-08 | 1.174090E-13 | 2.803028E-08 | 1.000 |
| 1770 | o393<br>conc | 3.946100E-08 | 1.101311E-13 | 3.946089E-08 | 1.000 |
| 1771 | o394<br>conc | 5.180260E-08 | 1.033030E-13 | 5.180250E-08 | 1.000 |
| 1772 | o395<br>conc | 6.404870E-08 | 9.689698E-14 | 6.404860E-08 | 1.000 |
| 1773 | o396<br>conc | 7.522440E-08 | 9.088706E-14 | 7.522431E-08 | 1.000 |
| 1774 | o397<br>conc | 8.488610E-08 | 8.524880E-14 | 8.488601E-08 | 1.000 |
| 1775 | o398<br>conc | 9.302900E-08 | 7.995931E-14 | 9.302892E-08 | 1.000 |
| 1776 | o399<br>conc | 9.966150E-08 | 7.499708E-14 | 9.966143E-08 | 1.000 |
| 1777 | o400<br>conc | 1.047920E-07 | 7.034191E-14 | 1.047919E-07 | 1.000 |
| 1778 | o401<br>conc | 1.084280E-07 | 6.597486E-14 | 1.084279E-07 | 1.000 |
| 1779 | o402<br>conc | 1.105790E-07 | 6.187817E-14 | 1.105789E-07 | 1.000 |
| 1780 | o403<br>conc | 1.112630E-07 | 5.803513E-14 | 1.112629E-07 | 1.000 |
| 1781 | o404<br>conc | 1.106210E-07 | 5.443010E-14 | 1.106209E-07 | 1.000 |
| 1782 | o405<br>conc | 1.088860E-07 | 5.104838E-14 | 1.088859E-07 | 1.000 |
| 1783 | o406<br>conc | 1.062910E-07 | 4.787617E-14 | 1.062910E-07 | 1.000 |
| 1784 | o407         | 1.030690E-07 | 4.490054E-14 | 1.030690E-07 | 1.000 |

|      |              |              |              |              |       |
|------|--------------|--------------|--------------|--------------|-------|
| 1785 | conc<br>o408 | 9.945440E-08 | 4.210933E-14 | 9.945436E-08 | 1.000 |
| 1786 | conc<br>o409 | 9.568040E-08 | 3.949116E-14 | 9.568036E-08 | 1.000 |
| 1787 | conc<br>o410 | 9.197960E-08 | 3.703533E-14 | 9.197956E-08 | 1.000 |
| 1788 | conc<br>o411 | 8.849010E-08 | 3.473180E-14 | 8.849007E-08 | 1.000 |
| 1789 | conc<br>o412 | 8.516850E-08 | 3.257115E-14 | 8.516847E-08 | 1.000 |
| 1790 | conc<br>o413 | 8.195060E-08 | 3.054455E-14 | 8.195057E-08 | 1.000 |
| 1791 | conc<br>o414 | 7.877250E-08 | 2.864371E-14 | 7.877247E-08 | 1.000 |
| 1792 | conc<br>o415 | 7.557000E-08 | 2.686083E-14 | 7.556997E-08 | 1.000 |
| 1793 | conc<br>o416 | 7.227910E-08 | 2.518863E-14 | 7.227907E-08 | 1.000 |
| 1794 | conc<br>o417 | 6.883580E-08 | 2.362026E-14 | 6.883578E-08 | 1.000 |
| 1795 | conc<br>o418 | 6.520510E-08 | 2.214928E-14 | 6.520508E-08 | 1.000 |
| 1796 | conc<br>o419 | 6.152120E-08 | 2.076966E-14 | 6.152118E-08 | 1.000 |
| 1797 | conc<br>o420 | 5.797910E-08 | 1.947575E-14 | 5.797908E-08 | 1.000 |
| 1798 | conc<br>o421 | 5.477390E-08 | 1.826223E-14 | 5.477388E-08 | 1.000 |
| 1799 | conc<br>o422 | 5.210060E-08 | 1.712413E-14 | 5.210058E-08 | 1.000 |
| 1800 | conc<br>o423 | 5.015430E-08 | 1.605677E-14 | 5.015428E-08 | 1.000 |
| 1801 | conc<br>o424 | 4.913010E-08 | 1.505576E-14 | 4.913008E-08 | 1.000 |
| 1802 | conc<br>o425 | 4.914850E-08 | 1.411700E-14 | 4.914849E-08 | 1.000 |
| 1803 | conc<br>o426 | 4.996780E-08 | 1.323662E-14 | 4.996779E-08 | 1.000 |
| 1804 | conc<br>o427 | 5.123580E-08 | 1.241101E-14 | 5.123579E-08 | 1.000 |
| 1805 | conc<br>o428 | 5.260070E-08 | 1.163675E-14 | 5.260069E-08 | 1.000 |
| 1806 | conc<br>o429 | 5.372650E-08 | 1.091068E-14 | 5.372649E-08 | 1.000 |
| 1807 | conc<br>o430 | 5.452150E-08 | 1.022979E-14 | 5.452149E-08 | 1.000 |
| 1808 | conc<br>o431 | 5.508430E-08 | 9.591290E-15 | 5.508429E-08 | 1.000 |
| 1809 | conc<br>o432 | 5.551840E-08 | 8.992539E-15 | 5.551839E-08 | 1.000 |
| 1810 | conc<br>o433 | 5.592730E-08 | 8.431072E-15 | 5.592729E-08 | 1.000 |
| 1811 | conc<br>o434 | 5.641470E-08 | 7.904574E-15 | 5.641469E-08 | 1.000 |
| 1812 | conc<br>o435 | 5.708410E-08 | 7.410873E-15 | 5.708409E-08 | 1.000 |
| 1813 | conc<br>o436 | 5.803860E-08 | 6.947930E-15 | 5.803859E-08 | 1.000 |
| 1814 | conc<br>o437 | 5.931950E-08 | 6.513835E-15 | 5.931949E-08 | 1.000 |
| 1815 | conc<br>o438 | 6.083730E-08 | 6.106794E-15 | 6.083729E-08 | 1.000 |
| 1816 | conc<br>o439 | 6.248570E-08 | 5.725127E-15 | 6.248569E-08 | 1.000 |
| 1817 | conc<br>o440 | 6.415840E-08 | 5.367255E-15 | 6.415839E-08 | 1.000 |
| 1818 | conc<br>o441 | 6.574900E-08 | 5.031698E-15 | 6.574899E-08 | 1.000 |
| 1819 | conc<br>o442 | 6.715150E-08 | 4.717070E-15 | 6.715150E-08 | 1.000 |
| 1820 | conc<br>o443 | 6.825940E-08 | 4.422067E-15 | 6.825940E-08 | 1.000 |

|      |              |              |              |              |       |
|------|--------------|--------------|--------------|--------------|-------|
| 1821 | o444<br>conc | 6.897850E-08 | 4.145469E-15 | 6.897850E-08 | 1.000 |
| 1822 | o445<br>conc | 6.929210E-08 | 3.886131E-15 | 6.929210E-08 | 1.000 |
| 1823 | o446<br>conc | 6.921410E-08 | 3.642978E-15 | 6.921410E-08 | 1.000 |
| 1824 | o447<br>conc | 6.875870E-08 | 3.415003E-15 | 6.875870E-08 | 1.000 |
| 1825 | o448<br>conc | 6.793980E-08 | 3.201260E-15 | 6.793980E-08 | 1.000 |
| 1826 | o449<br>conc | 6.677160E-08 | 3.000864E-15 | 6.677160E-08 | 1.000 |
| 1827 | o450<br>conc | 6.526820E-08 | 2.812983E-15 | 6.526820E-08 | 1.000 |
| 1828 | o451<br>conc | 6.346600E-08 | 2.636837E-15 | 6.346600E-08 | 1.000 |
| 1829 | o452<br>conc | 6.152200E-08 | 2.471696E-15 | 6.152200E-08 | 1.000 |
| 1830 | o453<br>conc | 5.963400E-08 | 2.316873E-15 | 5.963400E-08 | 1.000 |
| 1831 | o454<br>conc | 5.799960E-08 | 2.171725E-15 | 5.799960E-08 | 1.000 |
| 1832 | o455<br>conc | 5.681660E-08 | 2.035650E-15 | 5.681660E-08 | 1.000 |
| 1833 | o456<br>conc | 5.628270E-08 | 1.908081E-15 | 5.628270E-08 | 1.000 |
| 1834 | o457<br>conc | 5.659560E-08 | 1.788488E-15 | 5.659560E-08 | 1.000 |
| 1835 | o458<br>conc | 5.793820E-08 | 1.676374E-15 | 5.793820E-08 | 1.000 |
| 1836 | o459<br>conc | 6.018830E-08 | 1.571272E-15 | 6.018830E-08 | 1.000 |
| 1837 | o460<br>conc | 6.293640E-08 | 1.472744E-15 | 6.293640E-08 | 1.000 |
| 1838 | o461<br>conc | 6.576190E-08 | 1.380381E-15 | 6.576190E-08 | 1.000 |
| 1839 | o462<br>conc | 6.824420E-08 | 1.293797E-15 | 6.824420E-08 | 1.000 |
| 1840 | o463<br>conc | 6.996260E-08 | 1.212632E-15 | 6.996260E-08 | 1.000 |
| 1841 | o464<br>conc | 7.049670E-08 | 1.136547E-15 | 7.049670E-08 | 1.000 |
| 1842 | o465<br>conc | 6.942630E-08 | 1.065226E-15 | 6.942630E-08 | 1.000 |
| 1843 | o466<br>conc | 6.658270E-08 | 9.983701E-16 | 6.658270E-08 | 1.000 |
| 1844 | o467<br>conc | 6.244930E-08 | 9.357010E-16 | 6.244930E-08 | 1.000 |
| 1845 | o468<br>conc | 5.761370E-08 | 8.769571E-16 | 5.761370E-08 | 1.000 |
| 1846 | o469<br>conc | 5.266350E-08 | 8.218930E-16 | 5.266350E-08 | 1.000 |
| 1847 | o470<br>conc | 4.818620E-08 | 7.702788E-16 | 4.818620E-08 | 1.000 |
| 1848 | o471<br>conc | 4.476960E-08 | 7.218989E-16 | 4.476960E-08 | 1.000 |
| 1849 | o472<br>conc | 4.300000E-08 | 6.765511E-16 | 4.300000E-08 | 1.000 |
| 1850 | o473<br>conc | 4.321500E-08 | 6.340457E-16 | 4.321500E-08 | 1.000 |
| 1851 | o474<br>conc | 4.520450E-08 | 5.942050E-16 | 4.520450E-08 | 1.000 |
| 1852 | o475<br>conc | 4.868480E-08 | 5.568624E-16 | 4.868480E-08 | 1.000 |
| 1853 | o476<br>conc | 5.337270E-08 | 5.218615E-16 | 5.337270E-08 | 1.000 |
| 1854 | o477<br>conc | 5.898460E-08 | 4.890558E-16 | 5.898460E-08 | 1.000 |
| 1855 | o478<br>conc | 6.523700E-08 | 4.583080E-16 | 6.523700E-08 | 1.000 |
| 1856 | o479<br>conc | 7.184670E-08 | 4.294893E-16 | 7.184670E-08 | 1.000 |
| 1857 | o480         | 7.851040E-08 | 4.024789E-16 | 7.851040E-08 | 1.000 |



|      |              |              |              |              |       |
|------|--------------|--------------|--------------|--------------|-------|
| 1858 | conc<br>o481 | 8.479280E-08 | 3.771635E-16 | 8.479280E-08 | 1.000 |
| 1859 | conc<br>o482 | 9.020340E-08 | 3.534372E-16 | 9.020340E-08 | 1.000 |
| 1860 | conc<br>o483 | 9.425170E-08 | 3.312003E-16 | 9.425170E-08 | 1.000 |
| 1861 | conc<br>o484 | 9.644720E-08 | 3.103595E-16 | 9.644720E-08 | 1.000 |
| 1862 | conc<br>o485 | 9.629920E-08 | 2.908274E-16 | 9.629920E-08 | 1.000 |
| 1863 | conc<br>o486 | 9.331730E-08 | 2.725220E-16 | 9.331730E-08 | 1.000 |
| 1864 | conc<br>o487 | 8.703580E-08 | 2.553664E-16 | 8.703580E-08 | 1.000 |
| 1865 | conc<br>o488 | 7.771540E-08 | 2.392885E-16 | 7.771540E-08 | 1.000 |
| 1866 | conc<br>o489 | 6.644230E-08 | 2.242208E-16 | 6.644230E-08 | 1.000 |
| 1867 | conc<br>o490 | 5.434720E-08 | 2.101000E-16 | 5.434720E-08 | 1.000 |
| 1868 | conc<br>o491 | 4.256060E-08 | 1.968667E-16 | 4.256060E-08 | 1.000 |
| 1869 | conc<br>o492 | 3.221320E-08 | 1.844652E-16 | 3.221320E-08 | 1.000 |
| 1870 | conc<br>o493 | 2.443570E-08 | 1.728433E-16 | 2.443570E-08 | 1.000 |
| 1871 | conc<br>o494 | 2.032130E-08 | 1.619522E-16 | 2.032130E-08 | 1.000 |
| 1872 | conc<br>o495 | 2.013560E-08 | 1.517459E-16 | 2.013560E-08 | 1.000 |
| 1873 | conc<br>o496 | 2.333550E-08 | 1.421816E-16 | 2.333550E-08 | 1.000 |
| 1874 | conc<br>o497 | 2.934400E-08 | 1.332189E-16 | 2.934400E-08 | 1.000 |
| 1875 | conc<br>o498 | 3.758420E-08 | 1.248201E-16 | 3.758420E-08 | 1.000 |
| 1876 | conc<br>o499 | 4.747890E-08 | 1.169497E-16 | 4.747890E-08 | 1.000 |
| 1877 | conc<br>o500 | 5.845140E-08 | 1.095746E-16 | 5.845140E-08 | 1.000 |

1878  
1879 See file mfit.res for more details of residuals in graph-ready format.  
1880

1881 See file mfit.seo for composite observation sensitivities.  
1882  
1883

1884 Objective function ----->  
1885

1886 Sum of squared weighted residuals (ie phi) = 9.3045E-11  
1887  
1888

1889 Correlation Coefficient ----->  
1890

1891 Correlation coefficient = 0.99790  
1892  
1893

1894 Analysis of residuals ----->  
1895

1896 All residuals:-  
1897 Number of residuals with non-zero weight = 500  
1898 Mean value of non-zero weighted residuals = 1.3930E-07  
1899 Maximum weighted residual [observation "o80"] = 3.1737E-06  
1900 Minimum weighted residual [observation "o72"] = -2.3124E-06  
1901 Standard variance of weighted residuals = 1.8759E-13  
1902 Standard error of weighted residuals = 4.3312E-07  
1903

1904 Note: the above variance was obtained by dividing the objective  
1905 function by the number of system degrees of freedom (ie. number of  
1906 observations with non-zero weight plus number of prior information  
1907 articles with non-zero weight minus the number of adjustable parameters.)  
1908 If the degrees of freedom is negative the divisor becomes  
1909 the number of observations with non-zero weight plus the number of

1910 prior information items with non-zero weight.  
1911  
1912  
1913 Covariance and other statistical matrices cannot be determined:-  
1914 Memory conservation is operative so that covariance matrix is not calculated.  
1915  
1916
